# Supplementary material
Source: HighWire-hosted journal article supplement (https://jmg.bmj.com/content/58/2/87)
Supplement: inline-supplementary-material-3 [file inline-supplementary-material-3.xlsx]

## Sheet: ALS-implicated variant list
Gene	Loci	FALS/SALS	Accession number	Genomic location (hg19)	cDNA change	Amino acid change 1	Amino acid change 2	Notes	Ethinicity	References
KIF5A	12q13.3	SALS proband	NM_004984	12:57957481	c.291+5G>A	splicing	splicing		Caucasian	[1]
		SALS proband	NM_004984	12:57963890	c.1238A>G	p.Glu413Gly	p.E413G	low freq in gnomAD	European	[2]
		SALS/FTD proband	NM_004984	12:57965903	c.1422A>T	p.Gln474His	p.Q474H	low freq in gnomAD	European	[2]
		SALS proband	NM_004984	12:57968879	c.1729A>G	p.Ser577Gly	p.S577G	low freq in gnomAD	European	[2]
		FALS (juvenille ALS)	NM_004984	12:57970608	c.2263G>A	p.Glu755Lys	p.E755K	low freq in ExAC/gnomAD	Italy	[3]
		ALS-associated	NM_004984	12:57975700	c.2957C>T	p.Pro986Leu	p.P986L	low freq in ExAC/gnomAD	Caucasian, European	[2] [1]
		FALS proband	NM_004984	12:57975730	c.2987delA	p.Asp996AlafsTer52	p.D996AfsX52		Caucasian	[1]
		SALS proband	NM_004984	12:57975732	c.2989delA	p.Asn997MetfsTer51	p.N997MfsX51		Caucasian	[1]
		FALS	NM_004984	12:57976382	c.2993-3C>T	splicing	splicing		Caucasian	[1]
		SALS and FALS	NM_004984	12:57976384	c.2993-1G>A	splicing	splicing		Caucasian, European, China	[2] [1]
		FALS proband	NM_004984	12:57976388	c.2996delA	p.Asn999MetfsTer49	p.N999MfsX49		Caucasian	[1]
		FALS and SALS	NM_004984	12:57976411	c.3019A>G	p.Arg1007Gly	p.R1007G		Caucasian, European	[2] [1]
		FALS proband	NM_004984	12:57976412	c.3020G>A	p.Arg1007Lys	p.R1007K		Caucasian	[1]
		FALS proband	NM_004984	12:57976413	c.3020+1G>A	splicing	splicing		Caucasian	[1]
		FALS	NM_004984	12:57976414	c.3020+2T>A	splicing	splicing		Caucasian	[1]
		FALS and SALS	NM_004984	12:57976414	c.3020+2T>C	p.Asn999Valfs*39	p.N999MfsX49		European	[2]
		FALS proband	NM_004984	12:57976415	c.3020+3A>G	splicing	splicing		Caucasian	[1]
GPX3-TNIP1	5q33.1	SALS-associated	NM_002084	5:150410835	c.*3144C>T	downstream variant	downstream variant	common in controls	Chinese and Australian	[4]
TIA1	2p13.3	ALS/FTD	NM_022173	2:70439871	c.1141G>A	p.Ala381Thr	p.A381T	low frequency in ExAC	Caucasian	[5]
		FALS	NM_022173	2:70439927	c.1085C>T	p.Pro362Leu	p.P362L	low frequency in ExAC	Ireland/Germany	[5]
		ALS	NM_022173	2:70439934	c.1078G>A	p.Val360Met	p.V360M	low frequency in ExAC	Caucasian	[5]
		ALS	NM_022173	2:70439949	c.1063G>A	p.Gly355Arg	p.G355R	low frequency in ExAC	Caucasian	[5]
		SALS proband	NM_022173	2:70439957	c.1055C>T	p.Pro352Leu	p.P352L		China	[6]
		SALS proband	NM_022173	2:70439967	c.1045T>C	p.Ser349Pro	p.S349P		China	[7]
		ALS/FTD	NM_022173	2:70441513	c.1002G>T	p.Met334Ile	p.M334I	low frequency in ExAC	Caucasian	[5]
		SALS proband	NM_022173	2:70441542	c.973A>G	p.Asn325Asp	p.N325D		China	[8]
		SALS proband	NM_022173	2:70441616	c.899T>C	p.Ile300Thr	p.I300T		China	[6]
		ALS	NM_022173	2:70442511	c.880G>A	p.Val294Met	p.V294M	low frequency in ExAC	Caucasian	[5]
C21orf2	21q22.3	ALS-associated	NM_004928	21:45753117	c.172G>T	p.Val58Leu	p.V58L	present in controls	Caucasian	[9]
CCNF	16p13.3	FALS/FTD	NM_001761	16:2479489	c.7A>G	p.Ser3Gly	p.S3G		USA	[10]
		SALS proband	NM_001761	16:2482995	c.205C>T	p.His69Tyr	p.H69Y	low frequency in ExAC	Canada	[10]
		SALS proband	NM_001761	16:2483010	c.220G>A	p.Ala74Thr	p.A74T	low frequency in ExAC	Australia	[10]
		FALS	NM_001761	16:2485818	c.290A>G	p.Lys97Arg	p.K97R		UK	[10]
		SALS proband	NM_001761	16:2487264	c.481G>A	p.Gly161Arg	p.G161R	low frequency in ExAC	USA and China	[10]
		SALS	NM_001761	16:2488072	c.542C>T	p.Thr181Ile	p.T181I		Japan	[10]
		FALS	NM_001761	16:2488115	c.585T>G	p.Ser195Arg	p.S195R		Spain	[10]
		SALS	NM_001761	16:2489423	c.664T>C	p.Ser222Pro	p.S222P	low frequency in gnomAD	Taiwan	[11]
		SALS proband	NM_001761	16:2495482	c.953T>G	p.Val318Gly	p.V318G	low frequency in ExAC	Australia	[10]
		SALS proband	NM_001761	16:2495560	c.1031G>A	p.Arg344Lys	p.R344K	low frequency in ExAC	Japan	[10]
		FALS and SALS	NM_001761	16:2503248	c.1525T>C	p.Ser509Pro	p.S509P		Italy and Canada	[10]
		SALS proband	NM_001761	16:2503305	c.1582G>C	p.Glu528Gln	p.E528Q	low frequency in ExAC	Japan	[10]
		FALS and SALS probands	NM_001761	16:2503415	c.1592T>C	p.Leu531Arg	p.L531R	low frequency in ExAC	Japan	[10]
		SALS	NM_001761	16:2503419	c.1596C>T	p.Ser532Arg	p.S532R		Taiwan	[11]
		SALS	NM_001761	16:2503451	c.1628C>T	p.Thr543Ile	p.T543I		Japan	[10]
		SALS proband	NM_001761	16:2505401	c.1721G>A	p.Arg574Gln	p.R574Q	low frequency in ExAC	Canada	[10]
		SALS proband	NM_001761	16:2505490	c.1810T>A	p.Phe604Ile	p.F604I	low frequency in ExAC	Japan	[10]
		FALS	NM_001761	16:2505541	c.1861A>G	p.Ser621Gly	p.S621G		Australia	[10]
		SALS	NM_001761	16:2505550	c.1870G>A	p.Glu624Lys	p.E624K		USA	[10]
		SALS proband	NM_001761	16:2506732	c.2072G>A	p.Arg691Gln	p.R691Q	low frequency in ExAC	Japan	[10]
		FALS and SALS proband	NM_001761	16:2506800	c.2140G>A	p.Val714Met	p.V714M	low frequency in ExAC	Australia and Canada	[10]
		FALS	NM_001761	16:2506975	c.2315T>C	p.Ile772Thr	p.I772T		UK	[10]
NEK1	4q33	SALS proband	NM_001199397	4:170321700	c.3686A>G	p.Lys1229Arg	p.K1229R	low frequency in ExAC	China	[12]
		FALS proband	NM_001199397	4:170345819	c.3107C>G	p.Ser1036Ter	p.S1036X	low frequency in ExAC (<0.005)	Europe -mixed	[13]
		SALS proband	NM_001199397	4:170345924	c.3002C>A	p.Ser1001Tyr	p.S1001Y	low frequency in ExAC	China	[12]
		SALS proband	NM_001199397	4:170359388	c.2609insA	p.Tyr871ValfsTer17	p.Y871VfsX17		Belgium	[12]
		SALS proband	NM_001199397	4:170359412	c.2588-2A>G	splicing	splicing		China	[12]
		SALS proband	NM_001199397	4:170384421	c.2560delC	p.Leu854TyrfsTer2	p.L854YfsX2		Belgium	[12]
		FALS proband	NM_001199397	4:170398275	c.2434A>T	p.Arg812Ter	p.R812X		Europe -mixed	[13]
		SALS proband	NM_001199397	4:170398346	c.2363G>A	p.Trp788Ter	p.W788X		China	[12]
		SALS proband	NM_001199397	4:170398497	c.2212C>T	p.Arg738Ter	p.R738X		China	[12]
		SALS proband	NM_001199397	4:170428268	c.1927C>G	p.Arg643Gly	p.R643G	low frequency in ExAC	China	[12]
		SALS proband	NM_001199397	4:170429475	c.1757T>C	p.Leu586Pro	p.L586P	low frequency in ExAC	China	[12]
		FALS probands	NM_001199397	4:170458991	c.1634T>C	p.Met545Thr	p.M545T	low frequency in ExAC (<0.005)	Europe, Germany	[13] [14]
		SALS proband	NM_001199397	4:170476984	c.1449C>G	p.Arg484Gly	p.R484G	low frequency in ExAC	China	[12]
		FALS proband	NM_001199397	4:170477000	c.1433G>C	p.Gly478Ala	p.G478A		Germany	[14]
		FALS proband	NM_001199397	4:170482701	c.1196A>C	p.Glu399Ala	p.E399A	low frequency in ExAC (<0.005)	Europe -mixed	[13]
		SALS proband	NM_001199397	4:170502002	c.859C>G	p.Pro287Ala	p.P287A	low frequency in ExAC	China	[12]
		Risk allele	NM_001199397	4:170506525	c.782G>A	p.Arg261His	p.R261H	in ExAC	Belgium, Various	[15] [12]
		FALS proband	NM_001199397	4:170509809	c.542A>G	p.Asn181Ser	p.N181S	low frequency in ExAC (<0.005)	Europe -mixed	[13]
		FALS proband	NM_001199397	4:170511878	c.395A>G	p.Gln132Arg	p.Q132R		Germany	[14]
		FALS proband	NM_001199397	4:170523740	c.42_42delA	p.Ser14SerfsTer45	p.S14SfsX45		Europe -mixed	[13]
TBK1	12q14.2	FALS proband	NM_013254	12:64849654	c.4C>T	p.Gln2Ter	p.Q2X		European - mixed	[16]
		SALS proband	NM_013254	12:64849706	c.57_58delAG	p.Thr419_Gly420del	p.T419_G420del		Japan	[17]
		FALS proband	NM_013254	12:64849714	c.64A>C	p.Asn22His	p.N22H	low frequency in gnomAD	European - mixed	[16]
		SALS proband	NM_013254	12:64849717	c.67G>A	p.Val23Ile	p.V23I		Japan	[18]
		SALS proband	NM_013254	12:64849727	c.77G>A	p.Gly26Glu	p.G26E		France	[19]
		FALS proband	NM_013254	12:64853973	c.92A>G	p.Thr31Ala	p.T31A		European - mixed	[16]
		SALS proband	NM_013254	12:64854008	c.127A>G	p.Ile43Val	p.I43V		Taiwan	[18]
		FALS	NM_013254	12:64854021	c.140G>A	p.Arg47His	p.R47H		Germany, European	[20] [14]
		SALS proband	NM_013254	12:64854055	c.176dupT	p.Leu59PhefsTer16	p.L59FfsX16		Italy	[21]
		SALS proband	NM_013254	12:64854065	c.184C>T	p.Leu62Phe	p.L62F	low frequency in ExAC	China	[22]
		SALS and SALS/FTD probands	NM_013254	12:64854110	c.228+1G>A	p.Lys30_Glu76del	p.K30_E76del		Europe, Spain	[23] [24] [23]
		FALS and SALS/FTD probands	NM_013254	12:64858119	c.235_237del	p.Thr79del	p.T79del	low frequency in gnomAD	Spain, Europe	[23] [16] [24]
		FALS proband	NM_013254	12:64858172	c.288delT	p.Val97PhefsTer2	p.V97FfsX2		Sweeden	[23]
		FTD/FALS proband	NM_013254	12:64858234	c.349C>T	p.Arg117Ter	p.R117X		Italy	[23]
		SALS probands	NM_013254	12:64858237	c.352G>A	p.Asp118Asn	p.D118N	low frequency in ExAC	Japan, Italy	[21] [17]
		FALS	NM_013254	12:64858245	c.358+2T>C	splicing	splicing		Germany	[20] [14]
		SALS proband	NM_013254	12:64858248	c.358+5G>A	splicing	splicing		Italy	[21]
		SALS proband	NM_013254	12:64860701	c.379C>T	p.Arg127Ter	p.R127X		Germany	[23]
		FALS proband	NM_013254	12:64860707	c.385A>G	p.Asn129Asp	p.N129D		European - mixed	[16]
		SALS proband	NM_013254	12:64860749	c.427C>T	p.Arg143Cys	p.R143C		France	[19]
		FTD/SALS proband	NM_013254	12:64860788	c.467_468delCA	p.Thr156ArgfsTer6	p.T156RfsX6		France	[19]
		SALS proband	NM_013254	12:64860820	c.499_501delGAT	p.Asp167del	p.D167del		Belgium	[25]
		FALS	NM_013254	12:64868024	c.555T>A	p.Tyr185Ter	p.Y185X		Germany	[20] [14]
		SALS proband	NM_013254	12:64868090	c.621T>C	p.Ile207Thr	p.I207T	low frequency in ExAC	Japan	[17]
		FALS proband	NM_013254	12:64868118	c.649G>A	p.Gly217Arg	p.G217R		European - mixed	[16]
		SALS/FTD proband	NM_013254	12:64873851	c.762_763del	p.Asn254LysfsTer4	p.N254KfsX4		Spain	[24]
		SALS proband	NM_013254	12:64875680	c.871A>G	p.Lys291Glu	p.K291E	low frequency in ExAC	Italy	[21]
		SALS proband	NM_013254	12:64875690	c.881G>A	p.Gly294Asp	p.G294D		Taiwan	[18]
		SALS proband	NM_013254	12:64875732	c.923G>A	p.Arg308Gln	p.R308Q		Europe -mixed	[20]
		FALS	NM_013254	12:64875767	c.958_958delA	p.Thr320GlnfsTer40	p.T320QfsX40		Sweden	[20]
		SALS proband	NM_013254	12:64875768	c.959C>T	p.Thr320Ile	p.T320I		France	[19]
		SALS proband	NM_013254	12:64875773	c.964C>T	p.His322Tyr	p.H322Y		Belgium	[25]
		SALS proband	NM_013254	12:64875774	c.965A>G	p.His322Arg	p.H322R	low frequency in ExAC	Japan	[17]
		FALS/FTD and SALS/FTD probands	NM_013254	12:64875804	c.992+4_992+7delAGTA	p.Gly272_Thr331del	p.G272_T331del		Belgium, Spain, Europe	[23] [16] [24]
		SALS proband	NM_013254	12:64878091	c.1001T>C	p.Ile334Thr	p.I334T	low frequency in ExAC	China	[22]
		FALS and SALS probands	NM_013254	12:64878159	c.1069C>T	p.Arg357Ter	p.R357X		Japan, Europe	[16] [17]
		FALS and SALS proband	NM_013254	12:64878160	c.1070G>A	p.Arg357Gln	p.R357Q	low frequency in ExAC	Europe, Italy	[21] [16]
		SALS proband	NM_013254	12:64878162	c.1072C>T	p.Arg358Cys	p.R358C	low frequency in ExAC	Japan	[17]
		FALS proband	NM_013254	12:64878163	c.1073G>A	p.Arg358His	p.R358H		European - mixed	[16]
		SALS proband	NM_013254	12:64878226	c.1137_1138delTA	p.Pro378_Ile379del	p.P378_I379del		Japan	[17]
		SALS probands	NM_013254	12:64878240	c.1150C>T	p.Arg384Trp	p.R384W	low frequency in ExAC	Korea, Sardinia	[26] [27]
		FALS proband	NM_013254	12:64878270	c.1180T>G	p.Tyr394Asp	p.Y394D		European - mixed	[16]
		SALS proband	NM_013254	12:64879235	c.1190T>C	p.Ile397Thr	p.I397T	low frequency in ExAC	Italy	[21]
		FALS proband	NM_013254	12:64879236	c.1192delT	p.Ser398ProfsTer11	p.S398PfsX11		Belgium	[25]
		FALS proband	NM_013254	12:64879242	c.1197delC	p.Pro400LeufsTer9	p.P400LfsX9		Australia (Chinese ancestry)	[28]
		SALS proband	NM_013254	12:64879727	c.1270T>G	p.Tyr424Asp	p.Y424D		Italy	[29]
		FALS	NM_013254	12:64879775	c.1318C>T	p.Arg440Ter	p.R440X		France	[20] [19]
		SALS proband	NM_013254	12:64879787	c.1330C>T	p.Arg444Ter	p.R444X	low frequency in ExAC	Taiwan	[18]
		SALS proband	NM_013254	12: 64879788	c.1331G>A	p.Arg444Gln	p.R444Q	low frequency in ExAC	Sardinia	[26]
		FALS & SALS	NM_013254	12:64879798	c.1340+1G>A	p.Ala417Ter	p.A417X		Sweden	[20]
		FALS	NM_013254	12:64882268	c.1343_1346delAATT	p.Ile450LysfsTer15	p.I450KfsX15		Denmark & Sweeden	[20]
		FALS/FTD proband	NM_013254	12:64882310	c.1385_1388delCAGA	p.Thr462LysfsTer3	p.T462KfsX3		Germany	[23]
		FALS proband	NM_013254	12:64882338	c.1412G>A	p.Cys471Tyr	p.C471Y		European - mixed	[16]
		SALS proband	NM_013254	12:64882340	c.1414delA	p.Ile472SerfsTer8	p.I472SfsX8		Korea	[27]
		SALS proband	NM_013254	12:64882350	c.1424T>C	p.Ile475Thr	p.I475T		Korea	[27]
		SALS proband	NM_013254	12:64882352	c.1426G>A	p.Glu476Lys	p.E476K	low frequency in ExAC	Korea	[27]
		SALS proband	NM_013254	12:64882359	c.1433C>T	p.Thr478Ile	p.T478I	low frequency in ExAC	Japan	[17]
		FALS/FTD	NM_013254	12:64882359	c.1434_1435delTG	p.Val479GlufsTer4	p.V479EfsX4		Sweden	[20]
		FTD/SALS proband	NM_013254	12:64883824	c.1446T>G	p.Tyr482Ter	p.Y482X		France	[19]
		FALS proband	NM_013254	12:64889291	c.1551_1552insTT	p.Ser518LeufsTer32	p.S518LfsX32		Belgium	[25]
		SALS proband	NM_013254	12:64889473	c.1644–5_1644-2delAATA	splicing	splicing	low frequency in ExAC	Italy	[21]
		FALS proband	NM_013254	12:64889511	c.1676T>G	p.Met559Arg	p.M559R		Europe -mixed	[20]
		FALS proband	NM_013254	12:64889529	c.1694A>C	p.Gln565Pro	p.Q565P		European - mixed	[16]
		FALS proband	NM_013254	12:64890948	c.1869_1875del	p.Met623IlefsTer9	p.M623IfsX9		European - mixed	[16]
		FALS proband	NM_013254	12:64890966	c.1887_1890del	p.Gln629HisfsTer4	p.Q629HfsX4		European - mixed	[16]
		FALS and SALS	NM_013254	chr12:64891006	c.1927_1929delGAA	p.Glu643del	p.E643del		Germany, Europe, Spain, Belgium	[20] [25] [16] [24] [14]
		FTD/SALS	NM_013254	12:64891038	c.1958_1959insGT	p.Leu654CysfsTer21	p.L654CfsX21		China	[30]
		FTD/SALS proband	NM_013254	12:64891426	c.1960-2A>G	splicing	splicing		France	[19]
		FTD/SALS proband	NM_013254	12:64891431	c.1963C>T	p.Gln655Ter	p.Q655X		France	[19]
		FTD/SALS proband	NM_013254	12:64891453	c.1985T>C	p.Met662Thr	p.M662T		France	[19]
		FALS/FTD	NM_013254	12:64891530	c.2063_2064delTT	p.Leu688ArgfsTer14	p.L688RfsX14		China	[30]
		SALS proband	NM_013254	12: 64891750	c.2070delG	p.Met690IlefsTer4	p.M690IfsX4		Sardinia	[26]
		FALS proband	NM_013254	12:64891779	c.2099_2100del	p.Val700GlyfsTer2	p.V700GfsX2		Australia	[31]
		FALS/FTD	NM_013254	12:64891821	c.2138+2T>C	p.690_713del	p.690_713del		Denmark & Sweden	[20]
CHCHD10	22q11.23	SALS	NM_213720	22:24108321	c.403T>C	p.Tyr135His	p.Y135H	present in controls/low frequency in ExAC	Mixed European/caucasian populations	[32]
		SALS proband	NM_213720	22:24108401	c.323A>C	p.Gln108Pro	p.Q108P		Germany	[33]
		SALS proband	NM_213720	22:24108438	c.286C>A	p.Pro96Thr	p.P96T	present in ExAC	Belgium	[34]
		SALS proband	NM_213720 (NM_001301339)	22:24108439	c.285G>C (c.306G>C)	p.Gln95His (p.Gln102His)	p.Q95H(p.Q102H)		China	[35]
		SALS proband	NM_213720 (NM_001301339)	22:24108470	c.262-8A>G (c.275A>G)	splicing (p.Tyr92Cys)	p.Y92C		China	[35]
		SALS probands	NM_213720	22:24109583	c.239C>T	p.Pro80Leu	p.P80L	low frequency in ExAC	Belgium, Italy, Europe, Caucasian	[36] [34] [32]
		SALS proband	NM_213720	22:24109595	c.227G>C	p.Gly75Ala	p.G75A	present in controls/and ExAC	Mixed European/caucasian populations	[32]
		FALS	NM_213720	22:24109625	c.197G>T	p.Gly66Val	p.G66V		Finland	[37] [38]
		FALS proband	NM_213720	22:24109646	c.176C>T	p.Ser59Leu	p.S59L		Spain	[39]
		SALS and SALS/FTD probands	NM_213720	22:24109722	c.100C>T	p.Pro34Ser	p.P34S	Highly debatable pathogenicity	France, Italy, Europe, Caucasian	[40] [41] [32]
		SALS proband	NM_213720	22:24109754	c.68C>T (g.877C>T)	p.Pro23Leu	p.P23L		China	[42]
		FALS and SALS	NM_213720	22:24109778	c.44G>T	p.Arg15Leu	p.R15L		Germany, Europe, Caucasian, USA	[43] [37] [44] [14] [32]
		SALS proband	NM_213720	22:24109983	(g.648G>A)	splicing	splicing		China	[42]
		SALS proband	NM_213720	22:24110028	c.34C>T	p.Pro12Ser	p.P12S		Spain	[45]
		SALS proband	NM_213720	22:24110031	c.31C>G	p.Arg11Gly	p.R11G		Mixed European/caucasian populations	[32]
		SALS proband	NM_213720	22:24110046	c.16C>G	p.Arg6Gly	p.R6G	low frequency in ExAC	Mixed European/caucasian populations	[32]
MATR3	5q31.2	SALS proband	NM_199189	5:138611841	c.-339+2T>A	splicing	splicing		French Canadian	[46]
		SALS proband	NM_001194956	5:138629718	c.48+1G>T	splicing	splicing	low frequency in ExAC	French Canadian	[46]
		SALS proband	NM_199189	5:138643300	c.196C>A	p.Gln66Lys	p.Q66K		Italian	[47]
		SALS proband	NM_199189	5:138643318	c.214G>A	p.Ala72Thr	p.A72T		Taiwan	[48]
		FALS	NM_199189	5:138643358	c.254C>G	p.Ser85Cys	p.S85C		USA	[49]
		FALS	NM_199189	5:138643448	c.344T>G	p.Phe115Cys	p.F115C		USA	[49]
		SALS proband	NM_199189	5:138643543	c.439A>T	p.Arg147Trp	p.R147W		Italian	[50]
		FALS and SALS probands	NM_199189	5:138643561	c.457G>T	p.Gly153Cys	p.G153C		Italian	[47]
		SALS proband	NM_199189	5:138643564	c.460C>T	p.Pro154Ser	p.P154S		Britain	[49]
		SALS proband	NM_199189	5:138652792	c.1180G>A	p.Val394Met	p.V394M		French Canadian	[46]
		SALS proband	NM_199189	5:138658337	c.1829C>T	p.Ser610Phe	p.S610F		Chinese	[51]
		FALS	NM_199189	5:138658372	c.1864A>G	p.Thr622Ala	p.T622A		Sardinia	[49]
		SALS proband	NM_199189	5:138658499	c.1991A>C	p.Glu664Ala	p.E664A		Italian	[47]
		SALS proband	NM_199189	5:138658628	c.2120C>T	p.Ser707Leu	p.S707L		Italian	[47]
		SALS proband	NM_199189	5:138661340	c.2360A>G	p.Asn787Ser	p.N787S		Italian	[47]
TUBA4A	2q35	SALS/FTD proband	NM_006000	2:220115109	c.1312G>A	p.Asp438Asn	p.D438N		Italy	[52]
		FALS proband	NM_006000	2:220115131	c.1290C>G	p.Lys430Asn	p.K430N		Netherlands	[53]
		FALS proband	NM_006000	2:220115200	c.1221C>T	p.Trp407Ter	p.W407X		Italy	[53]
		FALS and SALS probands	NM_006000	2:220115274	c.1147G>A	p.Ala383Thr	p.A383T	Present in controls	China, Italy	[53] [54]
		SALS proband	NM_006000	2:220115376	c.1045A>T	p.Thr349Ser	p.T349S		Italy	[52]
		FALS proband	NM_006000	2:220115462	c.959C>T	p.Arg320His	p.R320H		UK	[53]
		FALS proband	NM_006000	2:220115463	c.958G>A	p.Arg320Cys	p.R320C		Italy	[53]
		SALS proband	NM_006000	2:220115720	c.701T>C	p.Ile234Thr	p.I234T		China	[54]
		FALS/FTD	NM_006000	2:220115779	c.642G>A	p.Arg215Cys	p.R215C		Spain	[53]
		FALS proband	NM_006000	2:220115989	c.432T>G	p.Thr145Pro	p.T145P		USA	[53]
		SALS proband	NM_006000	2:220116726	c.226+4A>G	splicing	splicing		Italy	[52]
		SALS/FTD proband	NM_006000	2:220116829	c.127C>A	p.Gly43Val	p.G43V		Italy	[53]
		SALS proband	NM_006000	2:220116831	c.125T>C	p.Ile42Thr	p.I42T	Present in controls	China	[54]
		SALS proband	NM_006000	2:220116937	c.19C>A	p.Val7Ile	p.V7I		Italy	[52]
HNRNPA1	12q13	FALS proband	NM_031157	12:54677628	c.940G>A	p.Asp314Asn	p.D314N		USA	[55]
		SALS proband	NM_031157	12:54677644	c.956A>G	p.Asn319Ser	p.N319S		USA	[55]
		FALS-flail limb	NM_031157	12:54677706	c.1018C>T	p.Pro340Ser	p.P340S		China	[56]
		FALS proband	NM_031157	12:54678053	c.1075G>A	p.Gly359Ser	p.G359S		Germany	[14]
HNRNPA2B1	7p15	SALS proband	NM_031243	7:26233225	c.847G>A	p.Gly283Arg	p.G283R		China	[56]
		SALS-flail limb proband	NM_031243	7:26233243	c.829C>A	p.Gln277Lys	p.Q277K		China	[56]
		SALS proband	NM_031243	7:26236179	c.611G>A	p.Gly204Glu	p.G204E		North America	[56]
PFN1	17p13	SALS proband	NM_005022	17:4849202	c.416A>T	p.Gln139Leu	p.Q139L		UK	[57]
		SALS proband	NM_005022	17:4849212	c.406C>T	p.Arg136Trp	p.R136W		China	[58]
		FALS probands	NM_005022	17:4849265	c.353G>T	p.Gly118Val	p.G118V		USA	[59]
		ALS-associated	NM_005022	17:4849268	c.350A>G	p.Glu117Gly	p.E117G	Present in controls	USA, Italy, UK	[59] [60] [61] [57]
		FALS	NM_005022	17:4849277	c.341T>C	p.Met114Thr	p.M114T		USA (Jewish descent)	[59]
		FALS	NM_005022	17:4849292	c.326C>T	p.Thr109Met	p.T109M		Germany	[14] [62]
		FALS	NM_005022	17:4850037	c.211T>G	p.Cys71Gly	p.C71G		USA	[59]
		FALS proband	NM_005022	17:4851632	c.58G>A	p.Ala20Thr	p.A20T		UK (Middle-East descent)	[57]
C9orf72	9p21	FALS and SALS	NM_145005 & NM_018325	9:27573526-27573544	GGGGCC hexanucleotide repeat expansion				Predominately European	[63] [64]
SQSTM1	5q35	SALS proband	NM_003900	5:179247888	c.-49G>C	splicing	splicing		Italy	[65]
		FALS and SALS probands	NM_003900	5:179247900	c.-37C>T	splicing	splicing		USA	[66]
		FALS and SALS probands	NM_003900	5:179248034	c.98C>T	p.Ala33Val	p.A33V		USA, Spain, France	[66] [67] [24]
		SALS proband	NM_003900	5:179248079	c.143T>C	p.Leu48Pro	p.L48P		USA	[68]
		SALS proband	NM_003900	5:179248093	c.157G>A	p.Ala53Thr	p.A53T		Japan	[69]
		SALS proband	NM_003900	5:179249993	c.241G>A	p.Glu81Lys	p.E81K		China	[70]
		SALS proband	NM_003900	5:179250011	c.259A>G	p.Met87Val	p.M87V		France	[71]
		SALS proband - compound heterozygous	NM_003900	5:179250020	c.268G>A	p.Val90Met	p.V90M		Japan	[72]
		SALS proband	NM_003900	5:179250047	c.295A>C	p.Ile99Leu	p.I99L		China	[73]
		SALS proband	NM_003900	5:179250860	c.304A>G	p.Lys102Glu	p.K102E		France	[71]
		FALS proband	NM_003900	5:179250900	c.344A>T	p.Gln115Leu	p.Q115L		Germany	[14]
		FALS and SALS probands	NM_003900	5:179251013	c.457G>A	p.Val153Ile	p.V153I	Present in controls	USA, Japan	[66] [72] [68]
		FALS proband	NM_003900	5:179251019	c.463G>A	p.Gly155lys	p.G155K		UK	[74]
		SALS proband	NM_003900	5:179252155	c.683C>T	p.Pro228Leu	p.P228L		USA	[66]
		SALS probands	NM_003900	5:179252184	c.712A>G	p.Lys238Glu	p.K238E	in controls	Italy	[65] [68]
		SALS proband	NM_003900	5:179252184	c.714_716delGAA	p.Lys238del	p.K238del		USA	[66]
		SALS proband	NM_003900	5:179252189	c.717C>A	p.Asn239Lys	p.N239K		China	[70]
		SALS proband	NM_003900	5:179252199	c.727A>T	p.Ser243Cys	p.S243C		Korea	[75]
		SALS proband	NM_003900	5:179260061	c.784G>A/C	p.Gly262Arg	p.G262R		India	[76]
		FALS (juvenile, compound heterozygote) and SALS	NM_003900	5:179260099	c.822G>C	p.Glu274Asp	p.E274D	in controls	Italy, Turkey	[65] [77]
		SALS proband	NM_003900	5:179260101	c.824G>A	p.Ser275Asn	p.S275N		Korea	[75]
		SALS proband	NM_003900	5:179260166	c.889G>A	p.Gly297Ser	p.G297S		China	[70]
		FALS proband	NM_003900	5:179260229	c.952T>C	p.Ser318Pro	p.S318P		USA	[66]
		SALS proband	NM_003900	5:179260238	c.961C>T	p.Arg321Cys	p.R321C		USA	[66]
		SALS proband	NM_003900	5:179260549	c.969-39G>A	splicing	splicing		Italy	[65]
		SALS proband	NM_003900	5:179260628	c.1011C>G	p.Asp337Glu	p.D337E		China	[73]
		SALS proband	NM_003900	5:179260638	c.1021C>G	p.Leu341Val	p.L341V		China	[73]
		SALS proband	NM_003900	5:179260660	c.1043C>T	p.Pro348Leu	p.P348L		Italy	[65]
		FALS proband	NM_003900	5:179260725	c.1108T>C	p.Ser370Pro	p.S370P		USA	[66]
		SALS proband	NM_003900	5:179260733	c.1116G>C	p.Glu372Asp	p.E372D		China	[70]
		SALS proband	NM_003900	5:179260779	c.1162C>T	p.Pro388Ser	p.P388S		China	[70]
		SALS proband	NM_003900	5:179260783	c.1165+1G>A	splicing	splicing		France	[71]
		SALS proband	NM_003900	5:179263419	c.1166-14_1166-11del	splicing	splicing		China	[73]
		FALS and SALS	NM_003900	5:179263445	c.1175C>T	p.Pro392Leu	p.P392L		USA, Spain, France, China	[66] [71] [74] [70] [24]
		FALS proband	NM_003900	5:179263501	c.1231G>A	p.Gly411Ser	p.G411S		USA	[66]
		SALS proband	NM_003900	5:179263543	c.1273G>A	p.Gly425Arg	p.G425R		USA	[66]
		SALS probands	NM_003900	5:179263583	c.1313C>T	p.Pro438Leu	p.P438L	in controls	Italy, India	[65] [76]
		SALS probands	NM_003900	5:179263586	c.1316C>T	p.Pro439Leu	p.P439L		Japan, Korea	[69] [75]
		FALS proband	NM_003900	5:179263600	c.*7G>C	splicing	splicing		USA	[66]
UBQLN2	Xp11	SALS proband	NM_013444	X:56590770	c.464G>A	p.Ser155Asn	p.S155N		French Canadian	[78]
		SALS proband	NM_013444	X:56590871	c.565C>A	p.Pro189Thr	p.P189T		French Canadian	[78]
		SALS proband	NM_013444	X:56591153	c.847G>A	p.Ala283Thr	p.A283T		Germany	[79]
		SALS	NM_013444	X:56591248	c.942T>A	p.Asp314Glu	p.D314E		Korea	[80]
		FALS	NM_013444	X:56591325	c.1019G>T	p.Ser340Ile	p.S340I		Turkey	[77] [81]
		SALS proband	NM_013444	X:56591432	c.1126A>G	p.Ile376Val	p.I376V		Korea	[75]
		SALS proband	NM_013444	X:56591480	c.1174A>G	p.Met392Val	p.M392V		China	[82]
		SALS	NM_013444	X:56591482	c.1176G>A	p.Met392Ile	p.M392I		Turkey	[77]
		SALS proband	NM_013444	X:56591504	c.1198A>G	p.Ser400Gly	p.S400G		Belgium	[83]
		SALS proband	NM_013444	X:56591580	c.1274A>G	p.Glu425Arg	p.E425R		Germany	[79]
		SALS proband	NM_013444	X:56591625	c.1319C>T	p.Pro440Leu	p.P440L		Bulgaria	[83]
		FALS proband	NM_013444	X:56591643	c.1337T>G	p.Met446Arg	p.M446R		Italy	[84]
		FALS	NM_013444	X:56591766	c.1460C>T	p.Thr487Ile	p.T487I		Australia and New Zealand, Germany	[85] [86] [14]
		SALS proband	NM_013444	X:56591768	c.1462G>A	p.Ala488Thr	p.A488T		France	[87]
		FALS proband	NM_013444	X:56591787	c.1481C>T	p.Pro494Leu	p.P494L		France	[87]
		FALS	NM_013444	X:56591795	c.1489C>T	p.Pro497Ser	p.P497S		USA, Germany	[88] [84] [14]
		FALS	NM_013444	X:56591796	c.1490C>A	p.Pro497His	p.P497H		USA and Italy	[88]
		FALS (mixed presentation with different neurodegenerative symptoms)	NM_013444	X:56591796	c.1490C>T	p.Pro497Leu	p.P497L		USA	[89]
		FALS proband	NM_013444	X:56591804	c.1498C>T	p.Pro500Ser	p.P500S		France	[87]
		FALS and SALS proband	NM_013444	X:56591805	c.1500_1508delCATAGGCCC	p.Gly502_Ile504del	p.G502_I504del		France and China	[90]
		FALS proband	NM_013444	X:56591822	c.1516C>T	p.Pro506Ser	p.P506S		Italy and Turkey	[84] [77]
		FALS	NM_013444	X:56591822	c.1516C>A	p.Pro506Thr	p.P506T		USA	[88]
		FALS proband	NM_013444	X:56591822	c.1516C>G	p.Pro506Ala	p.P506A		France	[87]
		FALS	NM_013444	X:56591831	c.1525C>T	p.Pro509Ser	p.P509S		USA	[88]
		FALS	NM_013444	X:56591879	c.1573C>T	p.Pro525Ser	p.P525S		USA and Turkey	[88] [77]
		FALS proband	NM_013444	X:56591904	c.1598C>T	p.Pro533Leu	p.P533L		Italy	[84]
		SALS proband	NM_013444	X:56591918	c.1612G>C	p.Val538Leu	p.V538L		Italy	[84]
ATXN2	12q24	FALS and SALS associated	NM_002973	12:112036753-112036822	CAG repeat expansion (~29-39 repeat units)				Caucasian - mixed	[91] [92] [93]
OPTN	10p13	ALS proband	NM_001008213	10:13151129	c.7C>T	p.His3Tyr	p.H3Y		Italy	[94]
		ALS proband	NM_001008213	10:13151168	c.46C>G	p.Pro16Ala	p.P16A		Italy	[94]
		FALS proband	NM_001008211	10:13151189	c.67G>T	p.Gly23Ter	p.G23X		Italy	[95]
		FALS proband	NM_021980	10:13152284	c.177G>C	p.Lys59Asn	p.K59N	Present in controls	France/Canada	[96]
		SALS proband	NM_021980	10:13152384	c.277G>C	p.Ala93Pro	p.A93P		Japan	[97]
		FALS proband	NM_021980	10:13152394	c.287G>T	p.Arg96Leu	p.R96L		France	[98]
		ALS-associated/oligogenic?	NM_001008213	10:13152400	c.293T>A	p.Met98Lys	p.M98K	Present in controls	UK	[99] [100] [77]
		FALS proband (recessive)	NM_001008213	10:13154486	c.403G>T	p.Glu135Ter	p.E135X		Germany	[14]
		SALS proband	NM_00108211	10:13154490	c.407C>T	p.Ala136Val	p.A136V		China	[101]
		SALS proband	NM_001008213	10:13154559	c.476G>T	p.Gly159Val	p.G159V	Present in controls	Denmark	[102]
		SALS proband	NM_001008213	10:13154564	c.481G>A	p.Val161Met	p.V161M		Japan	[103]
		FALS and SALS	NM_001008213	10:13154576	c.493C>T	p.Gln165Ter	p.Q165X		Denmark	[102] [104]
		SALS proband	NM_00108211	10:13154636	c.552+1delG	splicing	splicing		Italy	[95]
		FALS	NM_021980	10:13158267	delExon5	delExon5	delExon5		Japan	[105]
		FALS (recessive) and ALS-associated	NM_001008211	10:13154465	c.381_382insAG	p.Asp128ArgfsTer22	p.D128RfsX148	present in controls	Moroccan and Ashkenazi Jews and France	[98] [106]
		SALS proband	NM_001008213	10:13160964	c.703C>T	p.Gln235Ter	p.Q235X		USA	[68]
		FALS proband (compound heterozygote)	NM_001008211	10:13164390	c.785C>A	p.Ser262Ter	p.S262X		USA	[107]
		SALS proband	NM_021980	10:13164416	c.811C>T	p.Arg271Cys	p.R271C		Japan	[97]
		SALS proband	NM_00108211	10:13164449	c.844A>C	p.Thr282Pro	p.T282P		Italy	[95]
		FALS proband	NM_001008211	10:13165995	c.883G>T	p.Val295Phe	p.V295F		Australia	[108]
		SALS probands	NM_00108211	10:13166053	c.941A>T	p.Gln314Leu	p.Q314L	Present in controls	Italy, USA	[95] [68]
		FALS (recessive)	NM_001008213	10:13167493	c.1075_1077delAAA	p.Lys359del	p.K359del		Turkey	[77]
		SALS proband	NM_00108211	10:13167981	c.1184A>G	p.Lys395Arg	p.K395R	present in controls	China	[101]
		FALS and SALS	NM_021980	10:13167989	c.1192C>T	p.Gln398Ter	p.Q398X		Japan	[105] [109]
		SALS proband	NM_001008213	10:13167989	c.1192C>G	p.Gln398Glu	p.Q398E		Ireland	[110]
		FALS proband	NM_021980	10:13168039	c.1242+1G>A_insA	splicing	splicing		France/Canada	[96]
		FALS proband (compound heterozygote)	NM_001008211	10:13169790	c.1289_1290del	p.Leu430ArgfsTer16	p.L430RfsX16		USA	[107]
		FALS proband	NM_021980	10:13169822	c.1320delA	p.Lys440AsnfsTer8	p.K440NfsX8		France/Canada, Germany	[96] [14]
		SALS proband	NM_00108211	10:13169854	c.1352T>C	p.Ile451Thr	p.I451T		China	[101]
		SALS proband	NM_001008213	10:13169862	c.1360C>G	p.Gln454Glu	p.Q454E		Denmark	[102]
		SALS proband	NM_00108211	10:13169907	c.1401+4A>G	splicing	splicing		Italy	[95]
		FALS (oligogenic?)	NM_001008213	10:13174068	c.1403T>G	p.Met468Arg	p.M468R	present in controls	Canada	[111]
		FALS and SALS	NM_021980	10:13174098	c.1433A>G	p.Glu478Gly	p.E478G		Japan	[105] [97] [112] [109]
		FALS proband	NM_021980	10:13174107	c.1442C>T	p.Ala481Val	p.A481V		France/Canada	[96]
		SALS probands	NM_001008213	10:13174130	c.1465A>G	p.Lys489Glu	p.K489E		India	[76]
		SALS proband	NM_001008213	10:13174146	c.1481T>G	p.Leu494Trp	p.L494W		China	[113]
		FALS probands	NM_001008213	10:13174164	c.1499T>C	p.Leu500Pro	p.L500P		Switzerland, Italy	[114] [115]
		SALS proband	NM_00108211	10:13175515	c.1546G>C	p.Glu516Gln	p.E516Q		China	[101]
		FALS proband	NM_001008213	10:13178766	c.1634G>A	p.Arg545Gln	p.R545Q	present in controls	Germany	[99]
		FALS proband	NM_00108211	10:13178802	c.1670A>C	p.Lys557Thr	p.K557T		Italy	[95]
		ALS proband	NM_001008213	10:13178835	c.1703T>C	p.Leu568Ser	p.L568S		Italy	[94]
SPG11	15q14	SALS proband	NM_025137	15:44855327	c.7324G>C	p.Ala2442Pro	p.A2442P		Ireland	[110]
		SALS proband	NM_025137	15:44855402	c.7249G>C	p.Glu2417Gln	p.E2417Q		Korea	[75]
		FALS (recessive)	NM_001160227	15:44855496	c.6816T>A/G	p.Tyr2272Ter	p.Y2272X		Turkey	[77]
		FALS (recessive)	NM_001160227	15:44856762	c.6795T>A/G	p.Phe2265Leu	p.F2265L		Turkey	[77]
		FALS (recessive)	NM_025137	15:44856866	c.7029_7030insT	p.Val2344CysfsTer6	p.V2344CfsX6		Unknown	[116]
		SALS proband	NM_001160227	15:44859751	c.6286C>T	p.Arg2096Cys	p.R2096C		North America	[117]
		SALS proband	NM_001160227	15:44861655	c.6187T>C	p.Phe2063Leu	p.F2063L		North America	[117]
		SALS proband	NM_025137	15:44864940	c.6284T>C	p.Leu2095Ser	p.L2095S		Korea	[75]
		FALS (recessive)	NM_001160227	15:44865000	c.5885A>G	p.Asn1962Ser	p.N1962S		Turkey	[77]
		Juvenile ALS (recessive)	NM_025137	15:44865793	c.6157G>A	p.Val2053Met	p.V2053M		Unknown	[116]
		SALS proband	NM_025137	15:44865888	c.6062G>A	p.Arg2021Gln	p.R2021Q		Korea	[75]
		Juvenile ALS (recessive)	NM_025137	15:44867132	c.5974C>T	p.Arg1992Ter	p.R1992X		Unknown	[116]
		Juvenile ALS (recessive)	NM_025137	15:44867136	c.5970C>G	p.Tyr1990Ter	p.Y1990X		Unknown	[116]
		Juvenile ALS (recessive)	NM_025137	15:44876011	c.5866+1G>A (IVS30+1G>A)	splicing	splicing		Unknown	[116]
		SALS proband	NM_001160227	15:44876486	c.5392G>A	p.Glu1798Lys	p.E1798K		North America	[117]
		FALS (compound heterozygote)	NM_025137	15:44876678	c.5199delA	p.lys1733AsnfsTer105	p.K1733NfsX105		France (Lebanese descent)	[118]
		SALS proband	NM_025137	15:44881468	c.4888G>C	p.Glu1630Gln	p.E1630Q		Korea	[75]
		Juvenile ALS (recessive)	NM_025137	15:44887629	c.4461_4462delTG	p.Val1488LeufsTer13	p.V1488LfsX13		Unknown	[116]
		SALS proband	NM_025137	15:44888372	c.4343G>A	p.Cys1448Tyr	p.C1448Y		Ireland	[110]
		SALS proband	NM_025137	15:44888511	c.4204C>T	p.His1402Tyr	p.H1402Y		Korea	[75]
		SALS proband	NM_001160227	15:44889073	c.4070T>C	p.Leu1357Pro	p.L1357P		North America	[117]
		FALS proband	NM_025137	15:44892671	c.3680A>G	p.Lys1227Arg	p.K1227R		Ireland	[110]
		Juvenile ALS (recessive)	NM_025137	15:44905696	c.3076_3077insA	p.Arg1026fs	p.R1026fs		Unknown	[116]
		Juvenile ALS (recessive)	NM_025137	15:44913969	c.2608A>G	p.Ile870Valfs	p.I870Vfs		Unknown	[116]
		SALS proband	NM_025137	15:44914000	c.2577A>C	p.Gln859His	p.Q859H		Ireland	[110]
		Juvenile ALS (recessive)	NM_025137	15:44918575	c.2198T>G	p.Leu733Ter	p.L733X		Unknown	[116]
		FALS proband	NM_025137	15:44921004	c.1930A>T	p.Thr644Ser	p.T644S		Ireland	[110]
		SALS proband	NM_001160227	15:44925817	c.1621C>T	p.Gln541Ter	p.Q541X		North America	[117]
		SALS proband	NM_025137	15:44941137	c.1529G>A	p.Ser510Asn	p.S510N		Ireland	[110]
		SALS proband	NM_001160227	15:44944041	c.1104T>A	p.His368Gln	p.H368Q		North America	[117]
		SALS proband	NM_001160227	15:44944061	c.1084T>C	p.Trp362Arg	p.W362R		North America	[117]
		SALS proband	NM_001160227	15:44949342	c.820G>A	p.Val274Ile	p.V274I		North America	[117]
		Juvenile ALS (recessive)	NM_025137	15:44949427	c.733_734delAT	p.Met245ValfsTer2	p.M245VfsX2		Unknown	[116]
		FALS (compound heterozygote)	NM_025137	15:44949456	c.704_705delAT	p.His235ArgfsTer12	p.H235RfsX12		France (Lebanese descent)	[118]
		SALS proband	NM_025137	15:44951453	c.491C>T	p.Ser164Leu	p.S164L		Korea	[75]
		SALS proband	NM_025137	15:44952678	c.394A>G	p.Ser132Gly	p.S132G		Ireland	[110]
		SALS proband	NM_001160227	15:44952711	c.361A>C	p.Lys121Gln	p.K121Q		North America	[117]
		Juvenile ALS (recessive)	NM_025137	15:44952805	c.267G>A	p.Trp89Ter	p.W89X		Unknown	[116]
		Juvenile ALS (recessive)	NM_025137	15:44955728	c.118C>T	p.Gln40Ter	p.Q40X		Unknown	[116]
		SALS proband	NM_001160227	15:44955800	c.46A>C	p.Ser16Arg	p.S16R		North America	[117]
VCP	9p13	FALS proband	NM_007126	9:35057020	c.2421+94C>T	splicing	splicing		UK	[119]
		SALS proband	NM_007126	9:35057162	c.2373C>T	p.Arg662Cys	p.R662C		USA	[120]
		SALS proband	NM_007126	9:35057439	c.2249A>G	p.Asn750Ser	p.N750S		Ireland	[110]
		FALS proband	NM_007126	9:35059720	c.1774G>A	p.Asp592Asn	p.D592N		USA	[121]
		FALS probands	NM_007126	9:35059759	c.1749-14C>T	splicing	splicing		Italy	[122]
		SALS proband	NM_007126	9:35060456	c.1549A>C	p.Asn387Thr	p.N387T		USA	[120]
		SALS proband	NM_007126	9:35060820	c.1460G>A	p.Arg487His	p.R487H		Japan	[123]
		SALS proband	NM_007126	9:35062295	c.864C>T	p.Arg159Cys	p.R159C		USA	[120]
		FALS	NM_007126	9:35065252	c.572G>A	p.Arg191Gln	p.R191Q		Italy and USA	[121]
		FALS proband	NM_007126	9:35065348	c.476G>A	p.Arg159His	p.R159H		Netherlands	[124]
		FALS	NM_007126	9:35065349	c.475C>G	p.Arg159Gly	p.R159G		USA	[121]
		FALS proband	NM_007126	9:35065358	c.466G>T	p.Gly156Cys	p.G156C		Japan	[125]
		FALS	NM_007126	9:35065360	c.464G>A	p.Arg155His	p.R155H		USA, Germany	[121] [68] [14]
		FALS proband	NM_007126	9:35065361	c.463C>T	p.Arg155Cys	p.R155C		Japan	[126]
		SALS proband	NM_007126	9:35065373	c.451A>G	p.Ile151Val	p.I151V		USA (African American)	[127]
		SALS proband	NM_007126	9:35066777	c.340A>G	p.Ile114Val	p.I114V		Netherlands	[124]
		FALS (mixed presentation with different neurodegenerative symptoms)	NM_007126	9:35067919	c.271A>T	p.Asn91Tyr	p.N91Y		Brazil	[128]
		SALS/FTD proband	NM_007126	9:35068298	c.79A>G	p.Ile27Val	p.I27V		Spain	[24]
		FALS proband	NM_007126	9:35072570	c.-221_-220insCTGCCACTGCCACTGCCG	splicing	splicing		UK	[119]
		FALS proband	NM_007126	9:35072710	c.-360G>C	splicing	splicing		UK	[119]
ANG	14q11	SALS proband	NM_001145	14:21161718	c.-6G>A	splicing	splicing		USA	[129]
		SALS probands	NM_001145	14:21161726	c.3G>A	p.Met1Ile(Met(-24)Ile)	p.M1I(M(-24)I)	Present in controls	USA, Serbia	[130] [131]
		FALS proband	NM_001145	14:21161758	c.35T>C	p.Phe12Ser(Phe(-13)Ser)	p.F12S(F(-13)S)		USA	[130]
		SALS proband	NM_001145	14:21161759	c.36C>T	p.Phe12Leu(Phe(-13)Leu)	p.F12L(F(-13)L)	Present in controls	Germany	[132]
		SALS proband	NM_001145	14:21161767	c.44G>A	p.Gly15Asp(Gly(-10)Asp)	p.G15D(G(-10)D)	Present in controls	Netherlands	[133]
		SALS proband	NM_001145	14:21161784	c.61C>T	p.Pro21Ser(Pro(-4)Ser)	p.P21S(P(-4)S)	Present in controls	USA	[134] [130]
		SALS proband	NM_001145	14:21161793	c.70G>A	p.Ala24Thr	p.A24T		North America	[117]
		SALS proband	NM_001145	14:21161830	c.107A>T	p.Gln36Leu(Gln12Leu)	p.Q36L(Q12L)		Ireland and Scotland	[135]
		FALS proband	NM_001145	14:21161835	c.112T>C	p.Tyr38His	p.Y38H	Present in controls	USA	[129]
		SALS proband	NM_001145	14:21161844	c.121A>G	p.Lys41Glu(Lys17Glu)	p.K41E(K17E)		Sweeden	[135]
		FALS and SALS (oligogenic?)	NM_001145	14:21161845	c.122A>T	p.Lys41Ile(Lys17Ile)	p.K41I(K17I)	Present in controls	Ireland and Scotland, Caucasian/Australia/Netherlands/USA, India, France, USA, Serbia	[135] [134] [136] [137] [129] [133] [138] [139] [68] [140] [131] [76]
		SALS proband	NM_001145	14:21161860	c.137A>G	p.Asp46Gly	p.D46G	Present in controls	USA	[129]
		SALS proband	NM_001145	14:21161878	c.155G>A	p.Ser52Asn(Ser28Asn)	p.S52N(S28N)	Present in controls	North America	[134]
		SALS probands	NM_001145	14:21161887	c.164G>A	p.Arg55Lys(Arg31Lys)	p.R55K(R31K)		Irish/English	[135]
		FALS	NM_001145	14:21161912	c.189C>G	p.Cys63Trp(Cys39Trp)	p.C63W(C39W)		European	[135]
		SALS probands	NM_001145	14:21161914	c.191A>T	p.Lys64Ile(Lys40Ile)	p.K64I(K40I)		Ireland and Scotland	[135]
		SALS probands/FALS (oligogenic?)	NM_001145	14:21161931	c.208A>G	p.Ile70Val(Ile46Val)	p.I70V(I46V)	Present in controls	Scotland/Australia/France, Italy, Serbia	[135] [141] [94] [139] [131]
		SALS proband	NM_001145	14:21161941	c.218A>G	p.Asn73Ser(Asn49Ser)	p.N73S(N49S)		Japan	[142]
		SALS proband	NM_001145	14:21161955	c.232A>G	p.Lys78Glu(Lys54Glu)	p.K78E(K54E)	Present in controls	Germany, Italy	[132] [94]
		SALS proband	NM_001145	14:21162021	c.298T>A	p.Phe100Ile	p.F100I		Netherlands	[133] [138]
		SALS proband	NM_001145	14:21162034	c.311C>G	p.Thr104Ser(Thr80Ser)	p.T104S(T80S)		Netherlands	[133]
		SALS proband	NM_001145	14:21162061	c.338G>A	p.Trp89Ter	p.W89X		Italy	[94]
		FALS and SALS probands	NM_001145	14:21162102	c.379G>A	p.Val127Ile(Val103Ile)	p.V127I(V103I)	Present in controls	China, Japan	[143] [144] [112]
		FALS and SALS probands	NM_001145	14:21162130	c.407C>T	p.Pro136Leu(Pro112Leu)	p.P136L(P112L)	Present in controls	North America	[134] [68]
		FALS and SALS proband	NM_001145	14:21162132	c.409G>A	p.Val137Ile(Val113Ile)	p.V137I(V113I)		USA	[130]
		FALS proband	NM_001145	14:21162136	c.413A>G	p.His138Arg(His114Arg)	p.H138R(H114R)		USA	[130]
		FALS (oligogenic?)	NM_001145	14:21162156	c.433C>T	p.Arg145Cys(Arg121Cys)	p.R145C(R121C)	Present in controls	Italy	[145]
		SALS proband	NM_001145	14:21162157	c.434G>A	p.Arg145His(Arg121His)	p.R145H(R121H)	Present in controls	France	[141]
		SALS proband	NM_001145	14:21162169	c.446C>T	splicing	splicing	Present in controls	USA	[130]
ELP3	8p21	SALS proband	NM_018091	8:27957431	c.206G>T	p.Arg69Leu	p.R69L		Ireland	[110]
		SALS and FALS probands	NM_018091	8:27964297	c.326G>A	p.Cys109Tyr	p.C109Y	Present in controls	Ireland	[110]
		SALS proband	NM_018091	8:27995254	c.946A>T	p.Lys316Ter	p.K316X	Present in controls	North America	[117]
		SALS associated	NC_000008	8:28086088	g.28086088G>A	rs6985069	intron variant	common in controls	US	[146]
		SALS associated	NC_000008	8:28136109	g.28136109T>C	rs12682496 (merged to rs2614046) C haplotype	intron variant	common in controls	UK, Belgium and the US	[147]
FUS	16p11	FALS	NM_004960	16:31191534	c.-2A>T	splicing	splicing		Caucasian	[148]
		SALS	NM_004960	16:31193847	c.52C>T	p.Pro18Ser	p.P18S		French Canadian	[149]
		SALS	NM_004960	16:31193963	c.169_171delTCT	p.Ser57del	p.S57del		France	[150]
		FALS	NM_004960	16:31195275	c.287_291delCCTACinsAT	p.Ser96del	p.S96del		Caucasian	[148]
		SALS proband	NM_004960	16:31195538	c.344G>A	p.Ser115Asn	p.S115N		Netherlands	[133]
		SALS proband	NM_004960	16:31195623	c.430_447delGGACAGCAGCAAAGCTAT	p.Gly144_Tyr149del	p.G144_Y149del		French Canadian, Turkey, USA	[149] [129]
		FALS proband	NM_004960	16:31195661	c.467G>A	p.Gly156Glu	p.G156E		Italy	[151]
		SALS	NM_004960	16:31195669	c.475A>T	p.Asn159Tyr	p.N159Y	present in controls	French Canadian	[149]
		ALS proband	NM_004960	16:31195709	c.515delGAGGTGGAGGTG	p.Gly171_174del	p.G171_174del		Italy	[152]
		FALS	NM_004960	16:31195711	c.518_523delGAGGTG	p.Gly174_Gly175del	p.G174_G175del		Caucasian, African American, French Canadian	[148] [149]
		FALS	NM_004960	16:31195714	c.521_523+3delGAGGTG	p.Gly173_Gly174del	p.G173_G174del	present in controls	USA, UK, Canada, Italy	[153] [152] [154] [155] [129]
		FALS proband	NM_004960	16:31195717	c.523insGAGGTG	p.Gly175GlufsTer12	p.G175EfsX12		USA	[153]
		SALS proband	NM_004960	16:31196295	c.559G>A	p.Gly187Ser	p.G187S		Canada	[155]
		FALS proband	NM_004960	16:31196307	c.571G>A	p.Gly191Ser	p.G191S		Italy	[152]
		SALS/FTD	NM_004960	16:31196352	c.616G>A	p.Gly206Ser	p.G206S		South Korea	[148]
		SALS	NM_004960	16:31196382	c.646C>T	p.Arg216Cys	p.R216C		Italy	[152]
		FALS	NM_004960	16:31196402	c.667_678delGGCGGCGGCGGC	p.Gly223_Gly226del	p.G223_G226del		Caucasian	[148]
		SALS	NM_004960	16:31196410	c.674G>T	p.Gly225Val	p.G225V		Italy	[152] [156]
		SALS	NM_004960	16:31196412	c.676G>A	p.Gly226Ser	p.G226S	present in controls	French Canadaian	[149]
		ALS proband	NM_004960	16:31196414	c.679_684delGGCGGC	p.Gly223_Gly224del	p.G223_G224del		Italy	[152]
		ALS proband	NM_004960	16:31196414	c.679_687delGGCGGCGGT	p.Gly227_Gly229del	p.G227_G229del		Italy	[152]
		ALS proband	NM_004960	16:31196415	c.680_691delGGCGGCGGTGGT	p.Gly227_Gly230del	p.G227_G230del		Italy	[152]
		SALS	NM_004960	16:31196416	c.681_684delGGC	p.230delG	p.230delG		Korea	[157]
		FALS proband	NM_004960	16:31196420	c.684_685insGGC	p.Gly228_Gly229insGly	p.G228_G229insG		UK	[154]
		ALS proband	NM_004960	16:31196420	c.685_690delGGTGGT	p.Gly229_230del	p.G229_230del		Italy	[152]
		SALS proband	NM_004960	16:31196424	c.688G>T	p.Gly230Cys	p.G230C		Italy	[152]
		SALS	NM_004960	16:31196436	c.700C>T	p.Arg234Cys	p.R234C		Italy	[152]
		FALS and SALS	NM_004960	16:31196437	c.701G>T	p.Arg234Leu	p.R234L		Italy	[151]
		FALS proband	NM_004960	16:31196442	c.706A>G	p.Ser236Gly	p.S236G		Korea	[75]
		FALS	NM_004960	16:31196466	c.730C>T	p.Arg244Cys	p.R244C		USA	[153]
		SALS proband	NM_004960	16:31196470	c.734G>T	p.Gly245Val	p.G245V		Italy	[158]
		FALS proband	NM_004960	16:31199714	c.832+36A>G	splicing	splicing		Italy	[151]
		FALS proband	NM_004960	16:31200415	c.833-29C>T	splicing	splicing		Italy	[151]
		FALS	NM_004960	16:31200850	c.1449-1488delCTACCGGGGCCGCGGCGGGGACCGTGGAGGCTTCCGAGGG	p.Tyr485AlafsTer514	p.Y485AfsX514		Europe	[148]
		FALS proband	NM_004960	16:31201197	c.1066+82C>G	splicing	splicing		Italy	[151]
		SALS proband	NM_004960	16:31201591	c.1169-5A>G	splicing	splicing		Korea	[157]
		SALS	NM_004960	16:31201623	c.1196G>T	p.Gly399Val	p.G399V		Korea	[157]
		SALS proband	NM_004960	16:31201630	c.1204_1232delinsGGAGGTGGAGG	p.Ser402_Pro411delinsGlyGlyGlyGly	p.S402_P411delinsGGGG		USA	[159]
		SALS proband	NM_004960	16:31202087	c.1317T>C	p.Ser439Ser	p.S439S		USA	[129]
		FALS proband	NM_004960	16:31202155	c.1385C>T	p.Ser462Phe	p.S462F		Netherlands	[160]
		SALS	NM_004960	16:31202162	c.1392G>T	p.Met464Ile	p.M464I		Japan	[161]
		FALS probands	NM_004960	16:31202282	c.1394-2delA	splicing	splicing		Germany, USA	[68] [14]
		SALS proband	NM_004960	16:31202283	c.1394_1541del	p.Gly466ValfsTer14	p.G466VfsX14		USA	[159]
		FALS proband	NM_004960	16:31202310	c.1420_1421insGT	p.Gly472ValfsTer57	p.G472VfsX57		Japan	[162] [163]
		FALS proband	NM_004960	16:31202321	c.1432_1478del	p.Gly478LeufsTer2	p.G478LfsX2		Germany	[164] [14]
		Juvenile ALS	NM_004960	16:31202345	c.1456_1457delGG	p.Gly486ProfsTer30	p.G486PfsX30		China	[165]
		SALS proband	NM_004960	16:31202349	c.1459C>T	p.Arg487Cys	p.R487C		Netherlands	[133]
		Juvenile ALS	NM_004960	16:31202365	c.1475delG	p.Gly492GlufsTer527	p.G492EfsX527		Japan	[166] [167]
		FALS and SALS (including juvenile ALS)	NM_004960	16:31202373	c.1483C>T	p.Arg495Ter	p.R495X		China, Caucasian, Germany, Korea, Italy, Netherlands	[168] [148] [157] [133] [164] [169] [170] [171] [144] [172] [14]
		FALS	NM_004960	16:31202373	c.1483delC	p.Arg495GlufsTer34	p.R495EfsX34		Europe	[148]
		FALS and SALS (including juvenile ALS)	NM_004960	16:31202374	c.1484delG	p.Arg495GlnfsTer34	p.R495QfsX34		Germany, French Canadian	[173] [174]
		FALS	NM_004960	16:31202375	c.1485delA	p.Gly497AlafsTer32	p.G497AfsX32		Europe, Japan	[148] [163]
		SALS	NM_004960	16:31202376	c.1486delG	p.Gly496GlyfsTer31	p.G496GfsX31		Italy	[156]
		Juvenile ALS	NM_004960	16:31202378	c.1489_1490dup	p.Arg498AlafsTer32	p.R498AfsX32		China	[165]
		SALS	NM_004960	16:31202394	c.1504delG	p.Asp502ThrfsTer27	p.D502TfsX27		Germany	[174]
		SALS	NM_004960	16:31202395	c.1506dupA	p.Arg502GlnfsTer14	p.R502QfsX14		French Canadian	[149]
		SALS proband	NM_004960	16:31202396	c.1507_1508delAG	p.Gly503TrpfsTer12	p.G503WfsX12		Korea	[157]
		Juvenile FALS, SALS (de novo)	NM_004960	16:31202398	c.1509_1510delAG	p.Gly504TrpfsTer12	p.G504WfsX12		UK, China, Korea	[175] [169] [171] [144] [172]
		SALS probands	NM_004960	16:31202410	c.1520G>A	p.Gly507Asp	p.G507D		UK, Italy	[152] [154] [176]
		FALS and SALS probands	NM_004960	16:31202416	c.1526G>A	p.Gly509Asp	p.G509D		Italy, Germany	[14] [158]
		FALS	NM_004960	16:31202416	c.1527insTGGC	p.Lys510TrpfsTer517	p.K510WfsX517		Europe	[148]
		FALS	NM_004960	16:31202418	c.1528A>G	p.Lys510Glu	p.K510E		Spain, Japan	[177] [178] [163]
		FALS	NM_004960	16:31202419	c.1529A>G	p.Lys510Arg	p.K510R		Germany	[168] [164] [14]
		FALS proband	NM_004960	16:31202419	c.1529A>T	p.Lys510Met	p.K510M		Japan	[179]
		FALS probands	NM_004960	16:31202427	c.1537T>C	p.Ser513Pro	p.S513P		Japan	[177] [163]
		FALS and SALS	NM_004960	16:31202430	c.1540A>G	p.Arg514Gly	p.R514G		UK, Germany, China	[180] [181] [164] [14]
		FALS	NM_004960	16:31202718	c.1542-2A>C	splicing	splicing		France	[149]
		FALS and SALS	NM_004960	16:31202720	c.1542G>T	p.Arg514Ser	p.R514S		USA, China, Italy, Japan, France	[153] [182] [137] [177] [181] [114] [166] [163]
		FALS	NM_004960	16:31202721	c.1543G>T	p.Gly515Cys	p.G515C		USA	[153]
		Juvenile ALS	NM_004960	16:31202722	c.1544delG	p.Gly515ValfsTer14	p.G515VfsX14		China	[165]
		SALS	NM_004960	16:31202725	c.1547A>T	p.Glu516Val	p.E516V		China	[181]
		FALS probands	NM_004960	16:31202727	c.1549C>G	p.His517Asp	p.H517D		China, Japan	[183] [113] [126]
		FALS and SALS probands	NM_004960	16:31202728	c.1550A>C	p.His517Pro	p.H517P		Japan, Serbia	[177] [163]
		FALS (recessive)	NM_004960	16:31202729	c.1551C>G	p.His517Gln	p.H517Q		Cape Verdean	[153] [184]
		SALS proband	NM_004960	16:31202730	c.1552A>G	p.Arg518Gly	p.R518G		USA	[176]
		FALS	NM_004960	16:31202731	c.1553G>A	p.Arg518Lys	p.R518K		USA	[153]
		Juvenile ALS	NM_004960	16:31202731	c.1554_1557delACAG	p.Gln519IlefsTer9	p.Q519IfsX9		UK	[185]
		SALS	NM_004960	16:31202733	c.1555C>T	p.Gln519Ter	p.Q519X		French Canadian	[149]
		FALS proband	NM_004960	16:31202733	c.1555C>G	p.Gln519Glu	p.Q519E		Korea	[75]
		FALS and SALS	NM_004960	16:31202739	c.1561C>G	p.Arg521Gly	p.R521G		UK, USA, Caucasian, Italy, China	[153] [151] [180] [148] [129] [186] [169] [68] [144]
		FALS and SALS	NM_004960	16:31202739	c.1561C>T	p.Arg521Cys	p.R521C		UK, USA, Italy, Germany, Caucasian, African American, China, France, Australia, Canada, Japan, Spain, Netherlands	[150] [153] [151] [180] [187] [152] [160] [137] [155] [177] [188] [189] [148] [190] [191] [176] [192] [193] [186] [133] [156] [158] [14]
		FALS and SALS (including juvenile ALS)	NM_004960	16:31202739	c.1561C>A	p.Arg521Ser	p.R521S		Australia, Japan, France	[137] [166] [163] [194]
		FALS and SALS	NM_004960	16:31202740	c.1562G>A	p.Arg521His	p.R521H		UK, USA, Cambodia, China, France, Australia, Belgium, Germany, Italy, Netherlands, China, Japan	[150] [153] [180] [187] [195] [160] [137] [148] [176] [183] [183] [133] [196] [144] [164] [113] [197] [126] [14]
		FALS and SALS	NM_004960	16:31202740	c.1562G>T	p.Arg521Leu	p.R521L		Germany, Caucasian, China, Japan, Italy, France	[137] [148] [94] [196] [174] [163] [126] [144]
		FALS	NM_004960	16:31202742	c.1564A>G	p.Arg522Gly	p.R522G		USA, Italy	[153] [158]
		FALS	NM_004960	16:31202748	c.1570A>T	p.Arg524Trp	p.R524W		UK	[154]
		FALS proband	NM_004960	16:31202748	c.1570A>G	p.Arg524Gly	p.R524G		Germany	[14]
		FALS proband	NM_004960	16:31202749	c.1571G>C	p.Arg524Thr	p.R524T		USA	[153]
		FALS	NM_004960	16:31202749	c.1571G>T	p.Arg524Met	p.R524M		Turkey	[77]
		FALS	NM_004960	16:31202750	c.1572G>C	p.Arg524Ser	p.R524S		USA, Spain, Hispanic	[153] [148]
		FALS and SALS (including juvenile ALS)	NM_004960	16:31202752	c.1574C>T	p.Pro525Leu	p.P525L		China, Germany, USA, Canada, UK, Japan, Italy, Turkey, Ireland	[182] [153] [185] [148] [198] [129] [199] [94] [193] [186] [110] [169] [68] [174] [77] [158] [167] [200] [126] [144] [172] [201]
		FALS proband	NM_004960	16:31202753	c.1575_1576insTAT	p.Prp525_Tyr526insTyr	p.Prp525_Y526insY		China	[197]
		SALS proband, Juvenile ALS	NM_004960	16:31202755	c.1577A>G	p.Tyr526Cys	p.Y526C		France, North America	[117] [202]
		SALS proband	NM_004960	16:31202759	c.1581delA	p.Ter527Tyrext*1	p.X527Yext*1		Korea	[157]
		FALS proband	NM_004960	16:31202769	c.*10C>T	splicing	splicing		Italy	[151]
		FALS and SALS probands	NM_004960	16:31202773	c.*14C>T	splicing	splicing		China, Germany, USA	[196]
		SALS proband	NM_004960	16:31202780	c.*21C>T	splicing	splicing		Germany, Netherlands	[160] [191]
		SALS proband	NM_004960	16:31202800	c.*41G>A	splicing	splicing		USA	[129]
		FALS and SALS probands	NM_004960	16:31202807	c.*48G>A	splicing	splicing		Italy	[203]
		SALS proband	NM_004960	16:31202818	c.*59G>A	splicing	splicing		Italy	[203]
		SALS proband	NM_004960	16:31202863	c.*105dup	splicing	splicing		USA	[129]
		SALS proband	NM_004960	16:31202867	c.*108C>T	splicing	splicing		Italy	[203]
		SALS proband	NM_004960	16:31202869	c.*110G>A	splicing	splicing		Italy	[203]
		SALS proband	NM_004960	16:31202891	c.*132C>A	splicing	splicing		USA	[129]
		SALS proband	NM_004960	16:31202949	c.*190C>A	splicing	splicing		USA	[129]
TARDBP	1p36	SALS proband	NM_007375	1:11072744	c.-69C>T	splicing	splicing		UK	[204]
		SALS proband	NM_007375	1:11072747	c.-66G>T	splicing	splicing		UK	[204]
		SALS proband	NM_007375	1:11073719	c.-12-54G>A	splicing	splicing		UK	[204]
		FALS	NM_007375	1:11076931	c.269C>T	p.Ala90Val	p.A90V	present in controls	Switzerland, Denmark, UK, Spain	[204] [205] [206] [24]
		SALS proband	NM_007375	1:11078710	c.403-80G>A	splicing	splicing		UK	[204]
		SALS proband	NM_007375	1:11078893	c.506A>G	p.Asp169Gly	p.D169G		France	[207]
		SALS proband	NM_007375	1:11079042	c.543+112C>A	splicing	splicing		UK	[204]
		SALS	NM_007375	1:11082266	c.800A>G	p.Asn267Ser	p.N267S		Italy, India	[208] [94] [76]
		SALS	NM_007375	1:11082325	c.859G>A	p.Gly287Ser	p.G287S		UK,France,Italy, Ireland, USA	[207] [208] [204] [110] [68]
		FALS	NM_007375	1:11082335	c.869G>C	p.Gly290Ala	p.G290A		Europe	[209]
		FALS and SALS	NM_007375	1:11082341	c.875G>A	p.Ser292Asn	p.S292N		China	[210] [211] [144]
		SALS proband	NM_007375	1:11082347	c.881G>C	p.Gly294Ala	p.G294A		Australia	[212]
		FALS and SALS	NM_007375	1:11082347	c.881G>T	p.Gly294Val	p.G294V		Australia,Italy, Germany	[208] [213] [214] [215] [94] [216] [14]
		FALS	NM_007375	1:11082349	c.883G>T	p.Gly295Cys	p.G295C		Netherlands	[133]
		SALS	NM_007375	1:11082349	c.883G>C	p.Gly295Arg	p.G295R		Italy, USA	[208] [217]
		FALS and SALS	NM_007375	1:11082349	c.883G>A	p.Gly295Ser	p.G295S		France,Italy, Sardinia	[218] [208] [213] [137] [216] [156] [219]
		FALS	NM_007375	1:11082358	c.892G>A	p.Gly298Ser	p.G298S		China,Japan	[209] [220] [126]
		SALS	NM_007375	1:11082375	c.909A>C	p.Gln303His	p.Q303H		Italy	[94]
		FALS	NM_007375	1:11082397	c.931A>G	p.Met311Val	p.M311V		Belgium	[221]
		FALS	NM_007375	1:11082409	c.943G>A	p.Ala315Thr	p.A315T		Europe,France, USA, Turkey, Germany	[222] [207] [137] [217] [68] [77] [14]
		FALS	NM_007375	1:11082410	c.944C>A	p.Ala315Glu	p.A315E		Japan	[223]
		SALS proband	NM_007375	1:11082416	c.950G>C	p.Ser317Thr	p.S317T		Korea	[75]
		SALS proband	NM_007375	1:11082428	c.962C>G	p.Ala321Gly	p.A321G		UK	[224]
		SALS proband	NM_007375	1:11082428	c.962C>T	p.Ala321Val	p.A321V		UK	[204]
		SALS proband	NM_007375	1:11082457	c.991C>A	p.Gln331Lys	p.Q331K		UK	[212]
		FALS proband	NM_007375	1:11082461	c.995G>A	p.Ser332Asn	p.S332N		Italy	[208]
		SALS proband	NM_007375	1:11082470	c.1004G>A	p.Gly335Asp	p.G335D		Italy	[208]
		FALS	NM_007375	1:11082475	c.1009A>G	p.Met337Val	p.M337V		UK,Italy,Japan,China, USA, Australia, India	[225] [212] [208] [204] [226] [183] [114] [113] [227] [76] [228]
		FALS	NM_007375	1:11082494	c.1028A>G	p.Gln343Arg	p.Q343R		Japan	[229]
		FALS	NM_007375	1:11082501	c.1035C>A	p.Asn345Lys	p.N345K		USA	[225] [217]
		FALS and SALS	NM_007375	1:11082508	c.1042G>T	p.Gly348Cys	p.G348C		Belgium,France,Germany, Iran, USA, China	[207] [230] [231] [213] [137] [217] [14] [228] [232]
		FALS and SALS	NM_007375	1:11082509	c.1043G>T	p.Gly348Val	p.G348V		China,UK,NorthAmerica,USA	[204] [129] [211] [113] [144]
		FALS and SALS	NM_007375	1:11082521	c.1055A>G	p.Asn352Ser	p.N352S		Germany,Japan,Netherlands, Switzerland	[230] [233] [234] [133] [206] [14]
		FALS	NM_007375	1:11082521	c.1055A>C	p.Asn352Thr	p.N352T		USA	[217]
		FALS proband	NM_007375	1:11082535	c.1069G>C	p.Gly357Arg	p.G357R		Denmark	[205]
		FALS and SALS probands	NM_007375	1:11082535	c.1069G>A	p.Gly357Ser	p.G357S		Japan	[234] [112]
		SALS proband	NM_007375	1:11082541	c.1075A>G	p.Met359Val	p.M359V		Italy	[156]
		FALS	NM_007375	1:11082548	c.1082G>C	p.Arg361Thr	p.R361T		Norway	[205]
		SALS proband	NM_007375	1:11082549	c.1083G>T	p.Arg361Ser	p.R361S		France	[207]
		SALS proband	NM_007375	1:11082553	c.1087C>G	p.Pro363Ala	p.P363A		France	[231]
		SALS probands	NM_007375	1:11082568	c.1102G>A	p.Gly368Ser	p.G368S		Italy	[235] [114]
		SALS proband	NM_007375	1:11082586	c.1120_1121insA	p.Tyr374Ter	p.Y374X		France	[231]
		SALS proband	NM_007375	1:11082589	c.1123A>G	p.Ser375Gly	p.S375G		USA	[68]
		FALS	NM_007375	1:11082593	c.1127G>A	p.Gly376Asp	p.G376D		Australia,Italy, Switzerland, Japan	[215] [236] [206] [112] [237]
		FALS proband	NM_007375	1:11082597	c.1132_1146del15	p.Asn378_Ala382del	p.N378_A382del		Germany	[14]
		FALS	NM_007375	1:11082598	c.1132A>G	p.Asn378Asp	p.N378D		USA,China	[217] [183] [113]
		SALS proband	NM_007375	1:11082599	c.1133A>G	p.Asn378Ser	p.N378S		China	[238]
		FALS	NM_007375	1:11082601	c.1135T>C	p.Ser379Pro	p.S379P		Denmark,Italy, USA	[208] [217]
		FALS and SALS probands	NM_007375	1:11082602	c.1136C>G	p.Ser379Cys	p.S379C		Italy, Denmark	[208] [205]
		SALS proband	NM_007375	1:11082610	c.1144G>C	p.Ala382Pro	p.A382P		France,	[231]
		FALS and SALS	NM_007375	1:11082610	c.1144G>A	p.Ala382Thr	p.A382T		France,Italy,USA, Sardinia	[207] [208] [213] [239] [137] [240] [241] [215] [235] [129] [114] [94] [242] [243] [216] [156] [219]
		FALS and SALS	NM_007375	1:11082613	c.1147A>G	p.Ile383Val	p.I383V		Italy,Netherlands,USA, Turkey, China, Japan	[225] [217] [94] [133] [113] [77] [126]
		FALS	NM_007375	1:11082616	c.1150G>C	p.Gly384Arg	p.G384R		France,USA, Serbia	[137] [217] [131]
		FALS	NM_007375	1:11082619	c.1153T>G	p.Trp385Gly	p.W385G		France	[137]
		FALS	NM_007375	1:11082623	c.1158_1159delATinsCACCAACC	p.Ser387delinsThrAsnPro	p.S387delinsTNP		Australia	[236]
		FALS and SALS probands	NM_007375	1:11082634	c.1168A>G	p.Asn390Asp	p.N390D		Quebec, USA	[207] [217]
		SALS	NM_007375	1:11082635	c.1169A>G	p.Asn390Ser	p.N390S		France,Italy	[207] [114] [94]
		FALS, SALS and SALS/FTD	NM_007375	1:11082644	c.1178C>T	p.Ser393Leu	p.S393L		Italy, China, France	[208] [244] [245] [227]
CHMP2B	3p11	FALS and SALS probands	NM_014043	3:87289899	c.85A>G	p.Ile29Val	p.I29V		UK	[246] [247]
		SALS proband	NM_014043	3:87289932	c.118A>G	p.Lys40Glu	p.K40E		Ireland	[110]
		SALS proband	NM_014043	3:87289937	c.123G>T	p.Gln41His	p.Q41H		Ireland	[110]
		SALS proband	NM_014043	3:87294870	c.133G>A	p.Glu45Lys	p.E45K		India	[76]
		SALS proband	NM_014043	3:87295048	c.311C>A	p.Thr104Asn	p.T104N		UK	[247]
		FALS probands	NM_014043	3:87302948	c.618A>C	p.Gln206His	p.Q206H		UK	[246] [247]
VAPB	20q13	FALS proband	NM_004738	20:56993345	c.137C>T	p.Thr46Ile	p.T46I		UK	[248]
		FALS	NM_004738	20:56993374	c.166C>T	p.Pro56Ser	p.P56S		Brazil, France, Germany	[249] [250] [137] [251] [14]
		FALS proband	NM_004738	20:56993375	c.167C>A	p.Pro56His	p.P56H		China	[252]
		SALS proband	NM_004738	20:57016000	c.434C>T	p.A145V	p.A145V		Canada	[253]
		FALS proband (oligogenic?)	NM_004738	20:57019259	c.700G>A	p.Val234Ile	p.V234I		Netherlands	[254]
DCTN1	2p13	SALS proband	NM_004082	2:74588653	c.3810C>A	p.His1270Gln	p.H1270Q		USA	[68]
		SALS proband	NM_004082	2:74588717	c.3746C>T	p.Thr1249Ile	p.T1249I	present in controls	Germany, USA	[255] [68]
		FALS/FTD	NM_004082	2:74590464	c.3302G>A	p.Arg1101Lys	p.R1101K		Germany	[256]
		SALS proband	NM_004082	2:74590516	c.3250C>T	p.Pro1084Ser	p.P1084S	present in controls	North America	[117]
		SALS proband	NM_004082	2:74590527	c.3239C>T	p.Ser1080Phe	p.S1080F		USA	[68]
		SALS proband	NM_004082	2:74592682	c.2989C>T	p.Arg997Trp	p.R997W		Japan	[142]
		SALS probands	NM_004082	2:74592786	c.2887-2A>G	splicing	splicing		Ireland	[110]
		SALS proband	NM_004082	2:74593108	c.2798C>T	p.Ala933Val	p.A933V		China	[257]
		FALS	NM_004082	2:74594023	c.2353C>T	p.Arg785Trp	p.R785W		Germany	[255]
		SALS proband	NM_004082	2:74594523	c.2209G>A	p.Glu737Lys	p.E737K	present in controls	North America	[117]
		SALS proband	NM_004082	2:74595111	c.2002C>T	p.His668Tyr	p.H668Y		North America	[117]
		SALS proband	NM_004082	2:74595246	c.1867C>T	p.Arg623Trp	p.R623W		China	[257]
		FALS proband	NM_004082	2:74595997	c.1712T>C	p.Met571Thr	p.M571T		Germany	[255]
		SALS proband	NM_004082	2:74598161	c.788G>T	p.Ser263Ile	p.S263I	present in controls	North America	[117]
		SALS proband	NM_004082	2:74598677	c.632C>T	p.Pro211Leu	p.P211L		North America	[117]
		FALS proband	NM_004082	2:74598726	c.583A>C	p.Ile195Leu	p.I195L		Germany	[14]
		FALS	NM_004082	2:74605235	c.171G>A	p.Gly59Ser	p.G59S		USA	[258]
ALS2	2q33	FALS (juvenille)	NM_020919	2:202571575	c.4573dupG	p.Val1525GlyfsTer17	p.V1525GfsX17		Bangledesh	[259]
		FALS (juvenille)	NM_020919	2:202588112	c.3565delG	p.Val1189TrpfsTer19	p.V1189WfsX19		Japan	[260]
		SALS proband	NM_020919	2:202588147	c.3530G>T	p.Gly1177Val	p.G1177V		Korea	[75]
		SALS proband	NM_020919	2:202591475	c.3094C>T	p.Arg1032Cys	p.R1032C		Ireland	[110]
		SALS proband	NM_020919	2:202591523	c.3046C>A	p.Pro1016Thr	p.P1016T		Japan	[142]
		SALS proband	NM_020919	2:202593881	c.2606A>C	p.Gln869Pro	p.Q869P		Ireland	[110]
		FALS (juvenille/compound heterozygote)	NM_020919	2:202593908	c.2580-2A>G	splicing	splicing		Italy	[261]
		SALS proband	NM_020919	2:202598013	c.2566A>G	p.Thr856Ala	p.T856A		Ireland	[110]
		SALS proband	NM_020919	2:202598037	c.2542G>A	p.Ala848Thr	p.A848T		Korea	[75]
		SALS proband	NM_020919	2:202603402	c.2408A>G	p.Lys803Arg	p.K803R		Ireland	[110]
		SALS proband	NM_020919	2:202606461	c.2287G>A	p.Val763Ile	p.V763I		North America	[117]
		SALS probands	NM_020919	2:202609053	c.2098A>G	p.Thr700Ala	p.T700A		Ireland, North America	[110] [117]
		FALS (juvenille/recessive)	NM_020919	2:202609149	c.2002G>T	p.Gly668Ter	p.G668X		Bangledesh	[259]
		FALS (juvenille)	NM_020919	2:202611418	c.1867_1868delCT	p.Leu623ValfsTer24	p.L623VfsX24		Saudi Arabia	[262]
		SALS proband	NM_020919	2:202617879	c.1727C>T	p.Ala576Val	p.A576V		Korea	[75]
		FALS (juvenille)	NM_020919	2:202619247	c.1619G>A	p.Gly540Glu	p.G540E		Italy	[263]
		FALS (juvenille)	NM_020919	2:202622171	c.1425delAG	p.Glu476ArgfsTer21	p.E476RfsX21		Kuwait	[264]
		SALS proband	NM_020919	2:202622292	c.1304A>T	p.Gln435Leu	p.Q435L		Japan, Korea	[142] [75]
		SALS proband	NM_020919	2:202625791	c.926G>C	p.Ser309Thr	p.S309T		Korea	[75]
		FALS proband	NM_020919	2:202626142	c.575C>T	p.Pro192Leu	p.P192L	low frequency in gnomAD	Italy	[3]
		FALS (juvenille)	NM_020919	2:202626164	c.553delA	p.Thr185LeufsTer5	p.T185LfsX5		Turkey, Germany	[265] [14]
		SALS probands	NM_020919	2:202626382	c.335C>T	p.Ala112Val	p.A112V		Korea	[75]
		FALS (juvenille/compound heterozygote)	NM_020919	2:202626418	c.299G>T	p.Ser100Ile	p.S100I		Italy	[261]
		FALS (juvenille)	NM_020919	2:202631989	c.138delA	p.Ala47ProfsTer4	p.A47PfsX4		Tunisia	[264] [262]
NEFH	22q12	SALS proband	NM_021076	22:29876370	c.119C>T	p.Ala40Val	p.A40V		France/Canada	[266]
		SALS proband	NM_021076	22:29876826	c.575G>C	p.Arg192Pro	p.R192P		North America	[117]
		FALS proband	NM_021076	22:29879517	c.1037G>A	p.Arg346His	p.R346H		France/Canada	[266]
		FALS proband	NM_021076	22:29885004	c.1376_1379delAACA	p.Glu459GlyfsTer7	p.E459GfsX7		Germany	[14]
		SALS proband	NM_021076	22:29885210	c.1582_1683del	p.Ala528_Pro561del	p.A528_P561del		France/Canada	[267]
		SALS proband	NM_021076	22:29885593	c.1965_1988del	p.Glu658_Lys665del	p.E658_K665del		UK	[268]
		SALS proband	NM_021076	22:29885617	c.1989_2006del	p.Glu664_Pro669del	p.E664_P669del		UK	[268]
		FALS proband	NM_021076	22:29885617	c.1989_2030del	p.Ala686_Lys699del	p.A686_K699del		Scandanavia	[268]
		SALS proband	NM_021076	22:29885709	c.2080_2163insGCCAAGTCCCCAGTGAAGGAAGAAGCAAAGTCCCCTGAGAAGGCCAAGTCCCCAGTGAAGGAAGAAGCAAAGTCCCCTGAGAAG	duplicationofdomains10and11	duplicationofdomains10and11		UK	[269]
		SALS proband	NM_021076	22:29885858	c.2230_2247del	p.Ser752_Lys757del	p.S752_K757del		Scandanavia	[268]
		SALS probands	NM_021076	22:29885996	c.2368_2370del	p.Lys790del	p.K790del		France/Canada	[267]
		FALS proband	NM_021076	22:29886192	c.2564_2566delAGA	p.Lys857del	p.K857del		Germany	[14]
		SALS proband	NM_021076	22:29886230	c.2601G>T	p.Lys867Asn	p.K867N		France/Canada	[266]
		SALS proband	NM_021076	22:29886382	c.2753A>G	p.Glu918Gly	p.E918G		France/Canada	[266]
SETX	9q34	SALS probands	NM_015046	9:135139978	c.7682C>T	p.Ser2561Leu	p.S2561L	present in controls	Ireland	[110]
		SALS probands	NM_015046	9:135140015	c.7645G>A	p.Val2549Ile	p.V2549I	present in controls	Ireland	[110]
		SALS proband	NM_015046	9:135140020	c.7640T>C	p.Ile2547Thr	p.I2547T	present in controls	USA	[270] [68]
		SALS proband	NM_015046	9:135140041	c.7619G>T	p.Arg2540Leu	p.R2540L		North America	[117]
		SALS proband	NM_015046	9:135158710	c.6487C>G	p.Leu2163Val	p.L2163V		India	[76]
		FALS	NM_015046	9:135158790	c.6407G>A	p.Arg2136His	p.R2136H		Belgium	[271]
		SALS proband	NM_015046	9:135171280	c.6085A>G	p.Lys2029Glu	p.K2029E		USA	[270]
		SALS proband	NM_015046	9:135171313	c.6052A>G	p.Lys2018Glu	p.K2018E		Italy	[272]
		FALS probands	NM_015046	9:135172338	c.5885A>G	p.His1962Arg	p.H1962R		Germany	[273] [14]
		SALS probands	NM_015046	9:135172381	c.5842A>G	p.Met1948Val	p.M1948V		Ireland	[110]
		SALS proband	NM_015046	9:135173645	c.5603C>T	p.Pro1868Leu	p.P1868L		China	[274]
		FALS proband	NM_015046	9:135173661	c.5587A>G	p.Thr1863Ala	p.T1863A		Ireland	[110]
		SALS proband	NM_015046	9:135176028	c.5537G>A	p.Arg1846His	p.R1846H	present in controls	North America	[117]
		SALS proband	NM_015046	9:135201943	c.5042A>G	p.Tyr1681Cys	p.Y1681C		North America	[117]
		FALS proband	NM_015046	9:135202006	c.4979A>G	p.His1660Arg	p.H1660R		Germany	[14]
		SALS proband	NM_015046	9:135202223	c.4762G>A	p.Ala1588Thr	p.A1588T		USA	[68]
		FALS and SALS proband	NM_015046	9:135202325	c.4660T>G	p.Cys1554Gly	p.C1554G	present in controls	USA, Japan	[270] [68] [112]
		FALS proband	NM_015046	9:135202468	c.4517T>C	p.Met1506Thr	p.M1506T		Germany	[14]
		FALS proband	NM_015046	9:135202552	c.4433C>A	p.Ala1478Glu	p.A1478E		Germany	[273]
		SALS proband	NM_015046	9:135202993	c.3992C>T	p.Pro1331Leu	p.P1331L		China	[274]
		SALS proband	NM_015046	9:135203632	c.3353C>T	p.Thr1118Ile	p.T1118I		China	[275]
		SALS proband	NM_015046	9:135203632	c.3353C>A	p.Thr1118Lys	p.T1118K		USA	[68]
		FALS proband	NM_015046	9:135203929	c.3056C>T	p.Ser1019Phe	p.S1019F		Germany	[14]
		FALS proband	NM_015046	9:135204010	c.2975A>G	p.Lys992Arg	p.K992R		Ireland	[110]
		SALS proband	NM_015046	9:135204064	c.2921T>C	p.Ile974Thr	p.I974T		North America	[117]
		FALS proband	NM_015046	9:135204143	c.2842C>A	p.Pro948Thr	p.P948T		Ireland	[110]
		SALS proband	NM_015046	9:135204230	c.2755G>C	p.Val919Leu	p.V919L		Ireland	[110]
		SALS proband	NM_015046	9:135204718	c.2267A>T	p.Glu756Val	p.E756V		China	[274]
		SALS proband	NM_015046	9:135205295	c.1690T>G	p.Leu564Val	p.L564V		China	[274]
		FALS proband	NM_015046	9:135205611	c.1374T>G	p.Phe458Leu	p.F458L		Germany	[14]
		FALS (including juvenile ALS)	NM_015046	9:135205819	c.1166T>C	p.Leu389Ser	p.L389S		Italy, Germany, USA	[271] [276] [277] [14]
		SALS proband	NM_015046	9:135206694	c.980A>T	p.Glu327Val	p.E327V		USA	[68]
		SALS proband	NM_015046	9:135210013	c.820A>G	p.Met274Val	p.M274V		USA	[68]
		SALS proband	NM_015046	9:135210019	c.814C>G	p.His272Asp	p.H272D		Ireland	[110]
		SALS proband	NM_015046	9:135210027	c.806C>T	p.Ser269Leu	p.S269L		North America	[117]
		SALS proband	NM_015046	9:135210042	c.791A>G	p.Asn264Ser	p.N264S		Hungary	[278]
		SALS proband	NM_015046	9:135211743	c.658A>C	p.Lys220Gln	p.K220Q		USA	[68]
		SALS proband	NM_015046	9:135211898	c.503G>A	p.Arg168Gln	p.R168Q		USA	[68]
		SALS proband	NM_015046	9:135218144	c.431A>G	p.Asn144Ser	p.N144S		China	[274]
		SALS proband	NM_015046	9:135224775	c.41C>T	p.Thr14Ile	p.T14I		USA	[68]
		FALS (including juvenile ALS)	NM_015046	9:135224808	c.8C>T	p.Thr3Ile	p.T3I		Austria, Japan	[271] [279]
SOD1	21q22	FALS and SALS	NM_000454	21:33032092	c.10A>G	p.Lys4Glu	p.K4E		Poland, Japan	[280] [281]
		FALS	NM_000454	21:33032094	c.13_14delinsTT	p.Ala4Phe	p.A4F		Korea	[282] [157]
		FALS	NM_000454	21:33032095	c.13G>A	p.Ala5Thr	p.A5T		USA, Japan, Sardinia	[283] [284] [285] [129] [219]
		FALS probands	NM_000454	21:33032095	c.13G>T	p.Ala5Ser	p.A5S		Japan, Turkey	[286] [77]
		FALS	NM_000454	21:33032096	c.14C>T	p.Ala5Val	p.A5V		USA, Scandinavia, Italy, Caucasian, Sweden, China, Canada	[287] [288] [284] [289] [290] [291] [291] [292] [285] [293] [294] [295] [129] [117] [68] [296]
		FALS	NM_000454	21:33032098	c.16G>T	p.Val6Leu	p.V6L		Switzerland	[297]
		FALS	NM_000454	21:33032101	c.19T>G	p.Cys7Gly	p.C7G		Japan, Australia	[298] [194]
		FALS	NM_000454	21:33032101	c.19T>A	p.Cys7Ser	p.C7S		USA, China	[299] [144]
		FALS	NM_000454	21:33032101	c.20_21delinsTT	p.Cys7Phe	p.C7F		Japan, China	[300] [301]
		SALS proband	NM_000454	21:33032102	c.20G>A	p.Cys7Tyr	p.C7Y		Japan	[280]
		FALS	NM_000454	21:33032103	c.21C>G	p.Cys7Trp	p.C7W		China	[302]
		FALS	NM_000454	21:33032105	c.23T>A	p.Val8Glu	p.V8E		Japan	[303]
		FALS probands	NM_000454	21:33032107	c.25C>G	p.Leu9Val	p.L9V		USA, Japan, China	[285] [113] [304]
		FALS probands	NM_000454	21:33032108	c.26T>A	p.Leu9Gln	p.L9Q		Austria, USA	[305] [129]
		FALS proband	NM_000454	21:33032113	c.31G>C	p.Gly11Arg	p.G11R		Italy	[306]
		FALS	NM_000454	21:33032113	c.32_33delinsTT	p.Gly11Val	p.G11V		Korea	[307] [308]
		FALS proband	NM_000454	21:33032114	c.32G>C	p.Gly10Ala	p.G10A		China	[113]
		SALS probands	NM_000454	21:33032116	c.34G>T	p.Asp12Tyr	p.D12Y		Italy	[309] [310]
		FALS and SALS probands	NM_000454	21:33032119	c.37G>C	p.Gly13Arg	p.G13R		USA, Italy, Korea, Russia	[311] [291] [292] [285] [312] [313] [314]
		FALS and SALS	NM_000454	21:33032125	c.43G>A	p.Val15Met	p.V15M		USA, Hungary, China, Slovenia	[284] [285] [129] [315] [316] [317]
		SALS proband	NM_000454	21:33032126	c.44T>G	p.Val15Gly	p.V15G		Scandinavia	[290]
		FALS and SALS proband (including juvenile ALS)	NM_000454	21:33032131	c.49G>A	p.Gly17Ser	p.G17S		Japan, Portugal, China	[318] [113] [319]
		SALS proband	NM_000454	21:33032132	c.50G>C	p.Gly17Ala	p.G17A		USA, Korea	[129] [157]
		FALS proband	NM_000454	21:33032137	c.56_58delTCA	p.Ile19del	p.I19del		France	[320]
		SALS probands	NM_000454	21:33032141	c.59A>G	p.Asn20Ser	p.N20S	present in controls	Italy, France	[321] [322] [114]
		FALS and SALS	NM_000454	21:33032144	c.62T>G	p.Phe21Cys	p.F21C		Brazil, Korea, China, USA	[285] [323] [129] [157] [324]
		FALS and SALS	NM_000454	21:33032145	c.63C>G	p.Phe21Leu	p.F21L		Italy	[94]
		SALS probands	NM_000454	21:33032146	c.64G>A	p.Glu22Lys	p.E22K		UK, Scotland	[325] [326]
		FALS proband	NM_000454	21:33032147	c.65A>G	p.Glu22Gly	p.E22G		France, French Canadian, Sapin	[327] [328] [137]
		FALS	NM_000454	21:33032150	c.68A>T	p.Gln23Leu	p.Q23L		USA, Germany	[285] [329]
		FALS proband	NM_000454	21:33032150	c.68A>G	p.Gln23Arg	p.Q23R		Bangladesh	[330]
		SALS proband	NM_000454	21:33032151	c.69G>C	p.Gln22His	p.Q22H		Japan	[280]
		FALS proband	NM_000454	21:33036111	c.82_87del	p.Gly28_Pro29del	p.G28_P29del		Philippines, USA	[331] [129]
		FALS	NM_000454	21:33036118	c.88insA	p.Val30Met	p.V30M		China	[332] [333]
		FALS proband	NM_000454	21:33036125	c.95T>C	p.Val32Ala	p.V32A		Japan, France	[334] [335]
		FALS	NM_000454	21:33036142	c.112G>A	p.Gly38Arg	p.G38R		France, USA, Spain, Caucasian, Japan, China, Korea	[287] [336] [284] [289] [337] [286] [338] [285] [339] [137] [129] [157] [113] [68]
		FALS proband	NM_000454	21:33036143	c.113G>T	p.Gly38Val	p.G38V		Japan	[340]
		FALS	NM_000454	21:33036145	c.115C>G	p.Leu39Val	p.L39V		USA, Caucasian, China, Japan, Belgium, Germany, Italy	[287] [336] [341] [289] [337] [285] [329] [280] [114] [126] [342] [14]
		FALS proband	NM_000454	21:33036146	c.116T>G	p.Leu39Arg	p.L39R		France, French Canadian	[327] [137]
		FALS proband	NM_000454	21:33036152	c.122A>G	p.Glu41Gly	p.E41G		Italy	[156]
		FALS	NM_000454	21:33036154	c.124G>A	p.Gly42Ser	p.G42S		France, USA, Italy, Poland	[287] [336] [343] [337] [313] [322] [344] [137] [345]
		FALS	NM_000454	21:33036155	c.125G>A	p.Gly42Asp	p.G42D		USA, China, Sweden	[287] [336] [284] [337] [285] [293] [129] [144] [342]
		FALS and SALS	NM_000454	21:33036161	c.131A>G	p.His44Arg	p.H44R		USA, China, India, Germany, Japan, Australia	[287] [336] [284] [337] [285] [129] [126] [194] [342] [14] [76]
		FALS probands	NM_000454	21:33036167	c.137T>G	p.Phe46Cys	p.F46C		Italy	[291] [292]
		FALS probands	NM_000454	21:33036167	c.137T>C	p.Phe46Ser	p.F46S		Korea	[157] [346]
		FALS proband	NM_000454	21:33036169	c.139C>G	p.His47Asp	p.H47D		France	[137]
		FALS and SALS	NM_000454	21:33036170	c.140A>G	p.His47Arg	p.H47R		USA, Japan, China, Germany	[347] [348] [286] [285] [349] [329] [280] [126] [144] [350] [14]
		FALS	NM_000454	21:33036172	c.142G>T	p.Val48Phe	p.V48F		Iran, Italy	[292] [351] [114]
		FALS	NM_000454	21:33036176	c.146A>G	p.His49Arg	p.H49R		USA, Germany	[285] [14]
		FALS	NM_000454	21:33036177	c.147T>G	p.His49Gln	p.H49Q		UK	[352] [353] [354]
		SALS probands	NM_000454	21:33036178	c.148G>A	p.Glu50Lys	p.E50K		French Canadian, USA	[327] [129]
		ALS proband	NM_000454	21:33036194	c.164C>G	p.Thr55Arg	p.T55R		USA	[285]
		ALS proband	NM_000454	21:33038771	c.179G>T	p.Ser60Ile	p.S60I		USA	[285]
		SALS proband	NM_000454	21:33038776	c.184G>C	p.Gly62Arg	p.G62R		Italy	[355]
		FALS proband	NM_000454	21:33038785	c.193T>C	p.Phe65Leu	p.F65L		USA	[356]
		SALS probands	NM_000454	21:33038789	c.197A>G	p.Asn66Ser	p.N66S		USA, Spain, Italy	[338] [285] [357] [156]
		SALS probands (including juvenile ALS)	NM_000454	21:33038791	c.199C>T	p.Pro67Ser	p.P67S		Serbia, China, Korea	[358] [359] [157] [342]
		FALS proband	NM_000454	21:33038791	c.199C>G	p.Pro67Ala	p.P67A		USA	[129] [68]
		FALS proband	NM_000454	21:33038792	c.200C>G	p.Pro67Arg	p.P67R		France	[137]
		SALS probands	NM_000454	21:33038795	c.203T>C	p.Leu68Pro	p.L68P		Italy	[360]
		FALS proband	NM_000454	21:33038795	c.203T>G	p.Leu68Arg	p.L68R		French Canadian	[327]
		SALS proband	NM_000454	21:33038806	c.214C>T	p.His71Tyr	p.H71Y		Turkey	[77]
		FALS and SALS	NM_000454	21:33038809	c.217G>A	p.Gly73Ser	p.G73S		UK, Japan, Germany, Australia	[361] [362] [354] [363] [194] [14]
		FALS and SALS probands	NM_000454	21:33038809	c.217G>T	p.Gly73Cys	p.G73C		Sweden, Canada, USA	[364] [294] [129]
		SALS proband	NM_000454	21:33038810	c.218G>A	p.Gly73Asp	p.G73D		China	[342]
		FALS and SALS	NM_000454	21:33038821	c.229G>T	p.Asp77Tyr	p.D77Y		Scandinavia, Canada, USA	[290] [294] [68]
		FALS	NM_000454	21:33038822	c.230A>T	p.Asp77Val	p.D77V		Spain	[365] [339]
		FALS proband	NM_000454	21:33039564	c.240-7T>G	splicing	splicing		Sweden	[366]
		SALS proband	NM_000454	21:33039573	c.242A>G	p.His81Arg	p.H81R		Ireland	[367]
		FALS proband	NM_000454	21:33039581	c.250G>A	p.Asp84Asn	p.D84N		China	[113]
		FALS proband	NM_000454	21:33039582	c.251A>G	p.Asp84Gly	p.D84G		France	[137]
		FALS	NM_000454	21:33039584	c.253T>G	p.Leu85Val	p.L85V		Japan, USA	[368] [284] [348]
		FALS and SALS (juvenile ALS)	NM_000454	21:33039586	c.255G>C/T	p.Leu85Phe	p.L85F		France, French Canadian, UK, USA, China, Iran, Italy, India, Germany	[327] [362] [291] [292] [369] [285] [137] [329] [301] [370] [156] [167] [371] [144] [14]
		FALS	NM_000454	21:33039587	c.256G>C	p.Gly86Arg	p.G86R		USA, China	[287] [336] [284] [183] [113]
		FALS proband	NM_000454	21:33039587	c.256G>A	p.Gly86Ser	p.G86S		Japan, Korea	[372] [157]
		FALS proband	NM_000454	21:33039590	c.259A>G	p.Asn87Asp	p.N87D		Germany	[329]
		FALS and SALS probands (homozygous juvenile ALS J Med Genet. 1998 Feb;35(2):174.)	NM_000454	21:33039591	c.260A>G	p.Asn87Ser	p.N87S		France, Japan, Iran, Switzerland, Pakistan, Korea, Turkey, China, Germany	[373] [374] [137] [297] [375] [77] [197] [75] [14]
		FALS proband	NM_000454	21:33039592	c.261T>A	p.Asn87Lys	p.N87K		Germany	[376]
		FALS	NM_000454	21:33039594	c.263T>C	p.Val88Ala	p.V88A		USA, China, Germany	[285] [197] [14]
		ALS proband	NM_000454	21:33039595	c.265_273del	p.Thr89_Asp91del	p.T89_D91del		USA	[285]
		ALS proband	NM_000454	21:33039599	c.268G>A	p.Ala90Thr	p.A90T		USA	[285]
		FALS and SALS	NM_000454	21:33039600	c.269C>T	p.Ala90Val	p.A90V		USA, Sweden	[377] [285] [378] [379] [68]
		SALS probands	NM_000454	21:33039602	c.271G>A	p.Asp91Asn	p.D91N		Italy	[380] [114]
		FALS	NM_000454	21:33039602	c.272_274dupACA	p.Asp91_Lys92insAsn	p.D91_K92insN		China	[381]
		FALS and SALS (including recessive)	NM_000454	21:33039603	c.272A>C	p.Asp91Ala	p.D91A		USA, Scandinavia, Italy, Hungary, Iran, Portugal, Sweden, Canada, Spain, Belgium, Switzerland, Russia, Germany, Turkey, China, Australia, Serbia, North America	[382] [383] [384] [385] [290] [386] [341] [291] [291] [292] [377] [387] [285] [312] [313] [339] [294] [388] [389] [390] [391] [392] [329] [129] [114] [94] [297] [379] [370] [117] [68] [77] [144] [131] [194] [317] [319] [14]
		FALS	NM_000454	21:33039603	c.272A>T	p.Asp91Val	p.D91V		Japan	[393]
		SALS proband	NM_000454	21:33039605	c.275_276delAA	p.Lys92ArgfsTer9	p.K92RfsX9		Hungary	[317]
		FALS	NM_000454	21:33039611	c.280G>T	p.Gly94Cys	p.G94C		France, USA, Caucasian, Belgium, Slovenia	[287] [336] [289] [337] [341] [137] [316]
		FALS	NM_000454	21:33039611	c.280G>C	p.Gly94Arg	p.G94R		Scotland, UK	[394] [326] [395] [353] [354]
		FALS and SALS probands	NM_000454	21:33039611	c.280G>A	p.Gly94Ser	p.G94S		Iceland, Japan, Sweden	[396] [285] [280] [379] [126]
		FALS	NM_000454	21:33039612	c.281G>T	p.Gly94Val	p.G94V		France, Caucasian, UK, Australia	[397] [353] [354] [137] [194]
		FALS	NM_000454	21:33039612	c.281G>C	p.Gly94Ala	p.G94A		France, USA, Caucasian, Germany	[287] [336] [398] [289] [337] [285] [349] [137] [329]
		FALS and SALS probands	NM_000454	21:33039612	c.281G>A	p.Gly94Asp	p.G94D		France, USA, Italy	[398] [337] [292] [322] [399] [400] [401] [129] [114] [137] [156]
		SALS proband	NM_000454	21:33039615	c.284T>C	p.Val95Ala	p.V95A		USA	[129]
		SALS probands	NM_000454	21:33039617	c.286G>A	p.Ala96Thr	p.A96T		Italy	[291] [292] [357]
		ALS proband	NM_000454	21:33039618	c.287C>T	p.Ala96Val	p.A96V		USA	[402]
		FALS probands	NM_000454	21:33039618	c.287C>G	p.Ala96Gly	p.A96G		Sardinia	[219]
		FALS(compound heterozygote)	NM_000454	21:33039620	c.289G>A	p.Asp97Asn	p.D97N		France	[403]
		ALS proband	NM_000454	21:33039623	c.292G>A	p.Val98Met	p.V98M		USA	[285]
		SALS pronand	NM_000454	21:33039629	c.298A>G	p.Ile100Val	p.I100V		Netherlands	[404]
		FALS and SALS	NM_000454	21:33039632	c.301G>A	p.Glu101Lys	p.E101K		USA, Germany	[405] [406] [285] [349] [329] [129] [14]
		FALS	NM_000454	21:33039633	c.302A>G	p.Glu101Gly	p.E101G		USA, Caucasian, UK, Scotland, New Zealand, Australia	[287] [336] [407] [408] [284] [326] [289] [409] [337] [353] [354] [285] [194]
		FALS and SALS	NM_000454	21:33039635	c.304G>A	p.Asp102Asn	p.D102N		Asia, UK, USA, China	[407] [410] [353] [354] [197]
		FALS proband	NM_000454	21:33039635	c.304G>T	p.Asp102Tyr	p.D102Y		Japan	[411]
		FALS proband	NM_000454	21:33039635	c.304G>C	p.Asp102His	p.D102H		Japan	[412]
		FALS probands	NM_000454	21:33039636	c.305A>G	p.Asp102Gly	p.D102G		UK, Sweden, China	[409] [413] [353] [354] [379] [197]
		FALS	NM_000454	21:33039644	c.313A>T	p.Ile105Phe	p.I105F		Japan, Germany	[414] [348] [329] [14]
		ALS proband	NM_000454	21:33039646	c.316_321del	p.Ser106_Leu107del	p.S106_L107del		USA	[285]
		FALS and SALS	NM_000454	21:33039648	c.317C>T	p.Ser106Leu	p.S106L		Sweden, Spain, USA	[377] [339] [129] [379]
		FALS and SALS	NM_000454	21:33039650	c.319C>G	p.Leu107Val	p.L107V		USA, Caucasian, China, Japan, Belgium, Germany, Italy	[287] [336] [284] [289] [337] [285] [129] [126] [144]
		FALS probands	NM_000454	21:33039650	c.319C>T	p.Leu107Phe	p.L107F		Italy, China	[415] [113]
		SALS proband	NM_000454	21:33039651	c.320_321insT	p.Ser108LeufsTer15	p.S108LfsX15		Italy	[416]
		FALS	NM_000454	21:33039657	c.326G>T	p.Gly109Val	p.G109V		UK, Germany	[353] [417] [354] [14]
		SALS probands	NM_000454	21:33039659	c.328G>T	p.Asp110Tyr	p.D110Y		USA, Italy	[418] [114]
		FALS and SALS probands	NM_000454	21:33039666	c.335G>A	p.Cys112Tyr	p.C112Y		China, Canada	[294] [419] [113] [197] [342]
		FALS	NM_000454	21:33039669	c.338T>C	p.Ile113Thr	p.I113T		USA	[398] [337] [285]
		FALS	NM_000454	21:33039670	c.339C>G	p.Ile113Met	p.I113M		Spain	[338] [339] [420]
		ALS probands	NM_000454	21:33039671	c.340A>T	p.Ile114Phe	p.I114F		Sweden, Germany	[421] [379]
		FALS and SALS	NM_000454	21:33039672	c.341T>C	p.Ile114Thr	p.I114T		USA, UK, Italy, Caucasian, China, Sweden, Canada, Scotland, Japan, Germany, Australia	[422] [289] [409] [423] [326] [424] [353] [425] [386] [337] [425] [362] [354] [291] [292] [285] [293] [426] [294] [427] [329] [129] [428] [68] [194] [342] [14] [14] [194] [68]
		FALS probands	NM_000454	21:33039675	c.344G>C	p.Gly115Ala	p.G115A		Sweden	[377] [293]
		FALS	NM_000454	21:33039677	c.346C>G	p.Arg116Gly	p.R116G		USA, Germany	[429] [285] [349] [329] [297]
		SALS proband	NM_000454	21:33039677	c.346C>T	p.Arg116Cys	p.R116C		Italy, Germany	[430] [14]
		SALS proband	NM_000454	21:33039686	c.355delinsAAAAC	p.Val119LysfsTer5	p.V119KfsX5		UK	[386]
		FALS and SALS probands	NM_000454	21:33039686	c.355G>C/T	p.Val119Leu	p.V119L		France, USA, Japan	[431] [285] [137]
		FALS	NM_000454	21:33040480	c.358-304C>G	splicing	splicing		Canada	[432]
		FALS proband	NM_000454	21:33040773	c.358-11A>G	splicing	splicing		USA	[433]
		FALS proband	NM_000454	21:33040774	c.358-10A>G	splicing	splicing		USA	[434]
		SALS proband	NM_000454	21:33040784	c.358G>T	p.Val120Phe	p.V120F		China	[342]
		FALS proband	NM_000454	21:33040788	c.362A>T	p.His121Leu	p.H121L		USA	[129]
		SALS proband	NM_000454	21:33040791	c.365A>G	p.Glu122Gly	p.E122G		Italy	[435]
		FALS	NM_000454	21:33040800	c.374A>T	p.Asp125Val	p.D125V		USA, Caucasian, Australia	[397] [406] [285] [129] [194]
		ALS proband	NM_000454	21:33040800	c.374A>G	p.Asp125Gly	p.D125G		USA	[285]
		FALS	NM_000454	21:33040802	c.376G>C	p.Asp126His	p.D126H		UK	[352] [353] [354]
		SALS proband	NM_000454	21:33040802	c.376del	p.Asp126ThrfsTer24	p.D126TfsX24		USA	[129]
		FALS	NM_000454	21:33040805	c.379delTT	p.Leu127TrpfsTer23	p.L127WfsX23		Caucasian, Japan	[436] [437] [289] [438] [439]
		FALS and SALS	NM_000454	21:33040806	c.380T>C	p.Leu127Ser	p.L127S		Japan	[440] [441] [126]
		FALS proband	NM_000454	21:33040806	c.380T>A	p.Leu127Ter	p.L127X		USA, Caucasian	[405] [406] [433]
		SALS proband	NM_000454	21:33040808	c.382G>C	p.Gly128Arg	p.G128R		Turkey	[442]
		FALS proband	NM_000454	21:33040809	c.383_384insACCC	p.Lys129ProfsTer6	p.K129PfsX6		Scandinavia	[443]
		FALS	NM_000454	21:33040810	c.384_385insTGGG	p.Lys129TrpfsTer6	p.K129WfsX6		Scandinavia	[290]
		FALS	NM_000454	21:33040824	c.398insTT	p.Glu133ValfsTer31	p.E133VfsX31		UK	[353] [354]
		FALS and SALS	NM_000454	21:33040825	c.400_402del	p.Glu134del	p.E134del		USA, Italy, Caucasian, African American	[397] [337] [285] [322] [444] [129] [94]
		FALS proband	NM_000454	21:33040826	c.400G>A	p.Glu134Lys	p.E134K		Germany	[14]
		FALS and SALS probands	NM_000454	21:33040830	c.404G>A	p.Ser135Asn	p.S135N		Japan	[445] [126]
		SALS probands	NM_000454	21:33040830	c.404G>C	p.Ser135Thr	p.S135T		China, Japan	[280] [446]
		SALS proband	NM_000454	21:33040835	c.409A>T	p.Lys137Ter	p.K137X		Italy	[357]
		FALS	NM_000454	21:33040838	c.412A>G	p.Thr138Ala	p.T138A		Italy	[447]
		FALS and SALS probands	NM_000454	21:33040839	c.413C>G	p.Thr138Arg	p.T138R		China	[183] [113]
		FALS probands	NM_000454	21:33040842	c.416G>A	p.Gly139Glu	p.G139E		China	[183] [113]
		FALS and SALS	NM_000454	21:33040844	c.418A>C	p.Asn140His	p.N140H		Spain	[448] [339]
		FALS proband	NM_000454	21:33040844	c.418A>G	p.Asn140Asp	p.N140D		France	[137]
		FALS	NM_000454	21:33040846	c.420C>A	p.Asn140Lys	p.N140K		USA, Caucasian	[289] [285] [129]
		FALS probands	NM_000454	21:33040848	c.422C>G	p.Ala141Gly	p.A141G		USA	[449] [285]
		FALS	NM_000454	21:33040850	c.424G>T	p.Gly142Ter	p.G142X		USA	[285] [450]
		FALS	NM_000454	21:33040850	c.424G>A	p.Gly142Arg	p.G142R		Australia	[451]
		FALS probands	NM_000454	21:33040851	c.425G>A	p.Gly142Glu	p.G142E		Japan, Korea	[412] [157]
		FALS and SALS probands	NM_000454	21:33040851	c.425G>C	p.Gly142Ala	p.G142A		Japan, USA, China, Korea	[280] [129] [157] [126] [144]
		FALS and SALS	NM_000454	21:33040860	c.434T>C	p.Leu145Ser	p.L145S		USA, Caucasian, Iran, Brazil	[284] [423] [434] [337] [285] [370] [251]
		FALS and SALS	NM_000454	21:33040861	c.435G>C	p.Leu145Phe	p.L145F		USA, Caucasian, Hungary, Italy, France, Germany, Switzerland, Turkey, Serbia	[287] [289] [452] [285] [453] [349] [313] [329] [454] [129] [114] [297] [156] [77] [131] [317] [14]
		FALS	NM_000454	21:33040862	c.436G>A	p.Ala146Thr	p.A146T		Caucasian, USA	[423] [434] [337] [129]
		FALS	NM_000454	21:33040863	c.437C>G	p.Ala146Gly	p.A146G		Serbia/Croatia	[131]
		FALS	NM_000454	21:33040865	c.439T>C	p.Cys147Arg	p.C147R		USA, Japan, China	[405] [324] [455]
		FALS	NM_000454	21:33040867	c.441T>A	p.Cys147Ter	p.C147X		China	[456]
		ALS proband	NM_000454	21:33040868	c.442G>C	p.Gly148Arg	p.G148R		USA	[285]
		SALS proband	NM_000454	21:33040868	c.442G>A	p.Gly148Ser	p.G148S		Italy	[457]
		FALS proband	NM_000454	21:33040868	c.442G>T	p.Gly148Cys	p.G148C		Italy	[458]
		FALS and SALS probands	NM_000454	21:33040869	c.443G>A	p.Gly148Asp	p.G148D		France, Iran, China, India, Germany	[137] [419] [370] [324] [14] [76]
		FALS	NM_000454	21:33040871	c.445G>A	p.Val149Ile	p.V149I		Japan	[459] [348]
		FALS and SALS	NM_000454	21:33040872	c.446T>G	p.Val149Gly	p.V149G		USA, Germany, Turkey, Australia	[287] [284] [337] [285] [329] [129] [77] [194] [14]
		FALS proband	NM_000454	21:33040872	c.446T>C	p.Val149Ala	p.V149A		Germany	[14]
		SALS proband	NM_000454	21:33040874	c.448A>G	p.Ile150Val	p.I150V		North America	[117]
		FALS and SALS	NM_000454	21:33040875	c.449T>C	p.Ile150Thr	p.I150T		Caucasian, UK, Italy, China, Germany, USA, Japan	[352] [289] [353] [354] [460] [329] [129] [461] [126] [14]
		FALS	NM_000454	21:33040881	c.455T>C	p.Ile152Thr	p.I152T		France, Germany	[462] [137] [329] [14]
		ALS proband	NM_000454	21:33040881	c.455T>G	p.Ile152Ser	p.I152S		USA	[285]
		SALS proband	NM_000454	21:33040883	c.457G>C	p.Ala153Pro	p.A153P		Portugal	[319]

## Sheet: References
[1] Nicolas A, Kenna KP, Renton AE, Ticozzi N, Faghri F, Chia R, et al. Genome-wide Analyses Identify KIF5A as a Novel ALS Gene. Neuron. 2018;97(6):1268-1283.
[2] Brenner D, Yilmaz R, Muller K, Grehl T, Petri S, Meyer T, et al. Hot-spot KIF5A mutations cause familial ALS. Brain. 2018;141(3):688-697.
[3] Simone M, Trabacca A, Panzeri E, Losito L, Citterio A, Bassi MT. KIF5A and ALS2 Variants in a Family With Hereditary Spastic Paraplegia and Amyotrophic Lateral Sclerosis. Frontiers in Neurology. 2018;9:1-5.
[4] Benyamin B, He J, Zhao Q, Gratten J, Garton F, Leo PJJ, et al. Crossethnic meta-analysis identies association of the GPX3-TNIP1 locus with amyotrophic lateral sclerosis. Nature Communications. 2017;8(1):611.
[5] Mackenzie IR, Nicholson AM, Sarkar M, Messing J, Purice MD, Pottier C, et al. TIA1 Mutations in Amyotrophic Lateral Sclerosis and Frontotemporal Dementia Promote Phase Separation and Alter Stress Granule Dynamics. Neuron. 2017;95(4):808-816.
[6] Yuan Z, Jiao B, Hou L, Xiao T, Liu X, Wang J, et al. Mutation analysis of the TIA1 gene in Chinese patients with amyotrophic lateral sclerosis and frontotemporal dementia. Neurobiology of Aging. 2018;64:160.e9-160.e12.
[7] Gu XJ, Chen YP, Wei QQ, Cao B, Ou RW, Yuan XQ, et al. Mutation screening of the TIA1 gene in Chinese patients with amyotrophic lateral sclerosis/frontotemporal dementia. Neurobiology of Aging. 2018;68:161.e1-161.e3.
[8] Zhang K, Liu Q, Shen D, Tai H, Fu H, Liu S, et al. Genetic analysis of TIA1 gene in Chinese patients with amyotrophic lateral sclerosis. Neurobiology of Aging. 2018;67:201.e9-201.e10.
[9] van Rheenen W, Shatunov A, Dekker AM, McLaughlin RL, Diekstra FP, Pulit SL, et al. Genome-wide association analyses identify new risk variants and the genetic architecture of amyotrophic lateral sclerosis. Nat Genet. 2016;48(9):1043-1048.
[10] Williams KL, Topp S, Yang S, Smith B, Fifita JA, Warraich ST, et al. CCNF mutations in amyotrophic lateral sclerosis and frontotemporal dementia. Nature Communications. 2016;7.
[11] Tsai PC, Liao YC, Chen PL, Guo YC, Chen YH, Jih KY, et al. Investigating CCNF mutations in a Taiwanese cohort with amyotrophic lateral sclerosis. Neurobiology of Aging. 2018;62:243.e1-243.e6.
[12] Nguyen HP, Van Mossevelde S, Dillen L, De Bleecker JL, Moisse M, Van Damme P, et al. NEK1 genetic variability in a Belgian cohort of ALS and ALS-FTD patients. Neurobiol Aging. 2018;61:1-255.
[13] Brenner D, M uller K, Wieland T, Weydt P, S B, Lule D, et al. NEK1 mutations in familial amyotrophic lateral sclerosis. Brain and Nerve. 2016;139:e28.
[14] M uller K, Brenner D, Weydt P, Meyer T, Grehl T, Petri S, et al. Comprehensive analysis of the mutation spectrum in 301 German ALS families. Journal of Neurology, Neurosurgery and Psychiatry. 2018;89(8):817-827.
[15] Kenna KP, van Doormaal PT, Dekker AM, Ticozzi N, Kenna BJ, Diekstra FP, et al. NEK1 variants confer susceptibility to amyotrophic lateral sclerosis. Nat Genet. 2016;48(9):1037-1042.
[16] de Majo M, Topp SD, Smith BN, Nishimura AL, Chen HJ, Gkazi AS, et al. ALS-associated missense and nonsense TBK1 mutations can both cause loss of kinase function. Neurobiology of Aging. 2018;71:266.e1-266.e10.
[17] Tohnai G, Nakamura R, Sone J, Nakatochi M, Yokoi D, Katsuno M, et al. Frequency and characteristics of the TBK1 gene variants in Japanese patients with sporadic amyotrophic lateral sclerosis. Neurobiology of Aging. 2018;64:158.e15-158.e19.
[18] Tsai PC, Liu YC, Lin KP, Liu YT, Liao YC, Hsiao CT, et al. Mutational analysis of TBK1 in Taiwanese patients with amyotrophic lateral sclerosis. Neurobiology of Aging. 2016;40:191.e11-191.e16.
[19] Le Ber I, De Septenville A, Millecamps S, Camuzat A, Caroppo P, Couratier P, et al. TBK1 mutation frequencies in French frontotemporal dementia and amyotrophic lateral sclerosis cohorts. Neurobiology of Aging. 2015;36(11):3116.e5-3116.e8.
[20] Freischmidt A, Wieland T, Richter B, Ruf W, Schaeer V, Muller K, et al. Haploinsuciency of TBK1 causes familial ALS and fronto-temporal dementia. Nat Neurosci. 2015;18(5):631-636.
[21] Pozzi L, Valenza F, Mosca L, Dal Mas A, Domi T, Romano A, et al. TBK1 mutations in Italian patients with amyotrophic lateral sclerosis: Genetic and functional characterization. Journal of Neurology, Neurosurgery and Psychiatry. 2017;88(10):869-875.
[22] Shu S, Li XL, Liu Q, Liu F, Cui B, Liu MS, et al. Screening of the TBK1 gene in familial and sporadic amyotrophic lateral sclerosis patients of Chinese origin. 2016;17(7-8):605-607.
[23] van der Zee J, Gijselinck I, Van Mossevelde S, Perrone F, Dillen L, HeemanB, et al. TBK1 Mutation Spectrum in an Extended European PatientCohort with Frontotemporal Dementia and Amyotrophic Lateral Sclerosis. Human Mutation. 2017;38(3):297-309.
[24] Dols-Icardo O, Garcia-Redondo A, Rojas-Garcia R, Borrego-HernandezD, Illan-Gala I, Munoz-Blanco JL, et al. Analysis of known amyotrophiclateral sclerosis and frontotemporal dementia genes reveals a substantialgenetic burden in patients manifesting both diseases not carrying the C9orf72 expansion mutation. J Neurol Neurosurg Psychiatry. 2018;89(2):162-168.
[25] Gijselinck I, Van Mossevelde S, Van Der Zee J, Sieben A, Philtjens S,B H, et al. Loss of TBK1 is a frequent cause of frontotemporal dementiain a Belgian cohort. Neurology. 2015;85(24):2116-2125.
[26] Borghero G, Pugliatti M, Marrosu F, Marrosu MG, Murru MR, Floris G,et al. TBK1 is associated with ALS and ALS-FTD in Sardinian patients. Neurobiology of Aging. 2015;43:180.e1-180.e5.
[27] Kim YE, Oh KW, Noh MY, Nahm M, Park J, Lim SM,et al. Genetic and functional analysis of TBK1 variants in Koreanpatients with sporadic amyotrophic lateral sclerosis. Neurobiology of Aging. 2017;50:170.e1-170.e6.
[28] Williams KL, McCann EP, Fifita JA, Zhang K, Duncan EL, Leo PJ, et al. Novel TBK1 truncating mutation in a familial amyotrophiclateral sclerosis patient of Chinese origin. Neurobiol Aging. 2015;36(12):1-5.
[29] Piaceri I, Bessi V, Mata S, Polito C, Tedde A, Berti V, et al. Associationof the New Variant Tyr424Asp at TBK1 Gene with AmyotrophicLateral Sclerosis and Cognitive Decline. Journal of Alzheimer's Disease.2018;61(1):41-46.
[30] Jiao B, Sun Q, Yuan Z,Wang J, Zhou L, Yan X, et al. Rare TBK1 variantsin patients with frontotemporal dementia and amyotrophic lateral sclerosisin a Chinese cohort. Translational Neurodegeneration. 2018;7(31):1-6.
[31] McCombe PA, Ngo ST, Guo CC, Fazlollahi A, Bollmann S, Wang L,et al. Patient with ALS with a novel TBK1 mutation, widespread brain involvement, behaviour changes and metabolic dysfunction. Journal ofNeurology, Neurosurgery and Psychiatry. 2018;p. 1-3.
[32] Tazelaar GHP, van Rheenen W, Pulit SL, van der Spek RAA, DekkerAM, Moisse M, et al. CHCHD10 variants in amyotrophic lateral sclerosis: Where is the evidence? Annals of Neurology. 2018;84(1):110-116.
[33] Lehmer C, Schludi MH, Ransom L, Greiling J, Jungh anel M, ExnerN, et al. A novel CHCHD10 mutation implicates a Mia40-dependent mitochondrial import decit in ALS. EMBO Molecular Medicine.2018;10(6):e8558.
[34] Perrone F, Nguyen HP, Van Mossevelde S, Moisse M, Sieben A, SantensP, et al. Investigating the role of ALS genes CHCHD10 and TUBA4A inBelgian FTD-ALS spectrum patients. Neurobiol Aging. 2017;51:9-177
[35] Zhou Q, Chen Y, Wei Q, Cao B, Wu Y, Zhao B, et al. Mutation Screeningof the CHCHD10 Gene in Chinese Patients with Amyotrophic LateralSclerosis. Mol Neurobiol. 2017;54(5):3189-3194.
[36] Ronchi D, Riboldi G, Del Bo R, Ticozzi N, Scarlato M, Galimberti D,et al. CHCHD10 mutations in Italian patients with sporadic amyotrophiclateral sclerosis. Brain. 2015;138(Pt 8):e372.
[37] M uller K, Andersen PM, Huubers A, Marroquin N, Volk AE, Danzer KM,et al. Two novel mutations in conserved codons indicate that CHCHD10is a gene associated with motor neuron disease. Brain. 2014;137(12):e309-e309.
[38] Pasanen P, Myllykangas L, Poyhonen M, Kiuru-Enari S, Tienari PJ,Laaksovirta H, et al. Intrafamilial clinical variability in individuals carryingthe CHCHD10 mutation Gly66Val. Acta Neurologica Scandinavica. 2016;133(5):361-366.
[39] Bannwarth S, Ait-El-Mkadem S, Chaussenot A, Genin EC, Lacas-GervaisS, Fragaki K, et al. A mitochondrial origin for frontotemporal dementiaand amyotrophic lateral sclerosis through CHCHD10 involvement. Brain. 2014;(Pt 8):2329-2345.
[40] Chaussenot A, Le Ber I, Ait-El-Mkadem S, Camuzat A, de Septenville A,Bannwarth S, et al. Screening of CHCHD10 in a French cohort confirms the involvement of this gene in frontotemporal dementia with amyotrophic lateral sclerosis patients. Neurobiol Aging. 2014;35(12):1-2884.
[41] Chio A, Mora G, Sabatell M, Caponnetto C, Traynor B, Johnson J, et al.CHCH10 mutations in an Italian cohort of familial and sporadic ALS patients. Neurobiology of Aging. 2015;36(4):1-10.
[42] Shen S, He J, Tang L, Zhang N, Fan D. CHCHD10 mutations in patients with amyotrophic lateral sclerosis in Mainland China. Neurobiology of Aging. 2017;54:214.e7-214.e10.
[43] Johnson JO, Glynn SM, Gibbs JR, Nalls MA, Sabatelli M, Restagno G,et al. Mutations in the CHCHD10 gene are a common cause of familial amyotrophic lateral sclerosis. Brain. 2014;137(Pt 12):e311.
[44] Kurzwelly D, Kruger S, Biskup S, Heneka MT. A distinct clinical phenotypein a German kindred with motor neuron disease carrying a CHCHD10 mutation. Brain. 2015;138(Pt 9):e376.
[45] Dols-Icardo O, Nebot I, Gorostidi A, Ortega-Cubero S, Hernandez I,Rojas-Garcia R, et al. Analysis of the CHCHD10 gene in patients with frontotemporal dementia and amyotrophic lateral sclerosis from Spain. Brain. 2015;138(Pt 12):e400.
[46] Leblond CS, Gan-Or Z, Spiegelman D, Laurent SB, Szuto A, HodgkinsonA, et al. Replication study of MATR3 in familial and sporadic amyotrophiclateral sclerosis. Neurobiology of Aging. 2016;37:209.e17-209.e21.
[47] Moloney C, Rayaprolu S, Howard J, Fromholt S, Brown H, Collins M, et al.Analysis of spinal and muscle pathology in transgenic mice overexpressingwild-type and ALS-linked mutant MATR3. Acta neuropathologica communications. 2018;6(1):137.
[48] Lin KP, Tsai PC, Liao YC, Chen WT, Tsai CP, Soong BW, et al. Mutationalanalysis of MATR3 in Taiwanese patients with amyotrophic lateralsclerosis. Neurobiology of Aging. 2015;36(5):2005.e1-2005.e4.
[49] Johnson JO, Pioro EP, Boehringer A, Chia R, Feit H, Renton AE, et al.Mutations in the Matrin F3 gene cause familial amyotrophic lateral sclerosis.Nat Neurosci. 2014;(5):664-666.
[50] Origone P, Verdiani S, Bandettini Di Poggio M, Zuccarino R, Vignolo M,Caponnetto C, et al. A novel Arg147Trp MATR3 missense mutation ina slowly progressive ALS Italian patient. Amyotrophic Lateral Sclerosisand Frontotemporal Degeneration. 2015;16(7-8):530-531.
[51] Xu L, Li J, Tang L, Zhang N, Fan D. MATR3 mutation analysisin a Chinese cohort with sporadic amyotrophic lateral sclerosis. Neurobiology of Aging. 2015;38:218.e3-218.e4.
[52] Pensato V, Tiloca C, Corrado L, Bertolin C, Sardone V, Del Bo R, et al.TUBA4A gene analysis in sporadic amyotrophic lateral sclerosis: identi-cation of novel mutations. Journal of Neurology. 2015;262(5):1376-1378.
[53] Smith B, Ticozzi N, Fallini C, Gkazi A, Topp S, Kenna K, et al. Exome wide Rare Variant Analysis Identies TUBA4A Mutations Associated with Familial ALS. 2014;84(2):1922-2013.
[54] Li J, He J, Tang L, Chen L, Ma Y, Fan D. Screening for TUBA4Amutations in a large Chinese cohort of patients with ALS: Re-evaluatingthe pathogenesis of TUBA4A in ALS. Journal of Neurology, Neurosurgeryand Psychiatry. 2018;89(12):1350-1352.
[55] Kim HJ, Kim NC, Wang YD, Scarborough EA, Moore J, Diaz Z, et al. Mutations in prion-like domains in hnRNPA2B1 and hnRNPA1 cause multisystemproteinopathy and ALS. Nature. 2013;495(7442):467-473.
[56] Liu Q, Shu S, Wang RR, Liu F, Cui B, Guo XN, et al. Whole-exomesequencing identies a missense mutation in hnRNPA1 in a family withail arm ALS. Neurology. 2016;87(17):1763-1769.
[57] Smith BN, Vance C, Scotter EL, Troakes C, Wong CH, Topp S, et al.Novel mutations support a role for Prolin 1 in the pathogenesis of ALS. Neurobiology of Aging. 2015;36(3):1602.e17-1602.e27.
[58] Chen YP, Zheng ZZ, Huang R, Chen K, Song W, Zhao B, et al. PFN1mutations are rare in Han Chinese populations with amyotrophic lateralsclerosis. Neurobiology of Aging. 2013;34(7):1922.e1-1922.e5.
[59] Wu CH, Fallini C, Ticozzi N, Keagle PJ, Sapp PC, Piotrowska K, et al.Mutations in the prolin 1 gene cause familial amyotrophic lateral sclerosis.Nature. 2012;488(7412):499-503.
[60] Tiloca C, Ticozzi N, Pensato V, Corrado L, Del Bo R, BertolinC, et al. Screening of the PFN1 gene in sporadic amyotrophiclateral sclerosis and in frontotemporal dementia. Neurobiology of Aging. 2013;34(5):1517.e9-1517.e10.
[61] Fratta P, Charnock J, Collins T, Devoy A, Howard R, Malaspina A, et al.Prolin1 E117G is a moderate risk factor for amyotrophic lateral sclerosis.Journal of Neurology, Neurosurgery and Psychiatry. 2014;85(5):506-508.
[62] Ingre C, Landers JE, Rizik N, Volk AE, Akimoto C, Birve A, et al. A novelphosphorylation site mutation in prolin 1 revealed in a large screen of US,Nordic, and German amyotrophic lateral sclerosis/frontotemporal dementiacohorts. Neurobiology of Aging. 2013;34(6):1708.e1-1708.e6.
[63] Renton AE, Majounie E, Waite A, Simon-Sanchez J, Rollinson S, Gibbs JR, et al. A hexanucleotide repeat expansion in C9ORF72 is the cause of chromosome 9p21-linked ALS-FTD. Neuron. 2011;72(2):257-268.
[64] DeJesus-Hernandez M, Mackenzie IR, Boeve BF, Boxer AL, Baker M,Rutherford NJ, et al. Expanded GGGGCC hexanucleotide repeat in noncodingregion of C9ORF72 causes chromosome 9p-linked FTD and ALS.Neuron.;(2):245-256.
[65] Rubino E, Rainero I, Chio A, Rogaeva E, Galimberti D, Fenoglio P,et al. SQSTM1 mutations in frontotemporal lobar degeneration and amyotrophiclateral sclerosis. Neurology. 2012;79(15):1556-1562.
[66] Fecto F, Yan J, Vemula SP, Liu E, Yang Y, Chen W, et al. SQSTM1 mutations in familial and sporadic amyotrophic lateral sclerosis. ArchNeurol. 2011;68(11):1440-1446.
[67] Le Ber I, Camuzat A, Guerreiro R, Bouya K. Europe PMC FundersGroup SQSTM1 Mutations in French Patients With Frontotemporal Dementiaor Frontotemporal Dementia With Amyotrophic Lateral Sclerosis.2013;70(11):1403-1410.
[68] Cady J, Allred P, Bali T, Pestronk A, Goate A, Miller TM, et al. Amyotrophiclateral sclerosis onset is inuenced by the burden of rare variantsin known amyotrophic lateral sclerosis genes. Annals of Neurology.2015;77(1):100-113.
[69] Hirano M, Nakamura Y, Saigoh K, Sakamoto H, Ueno S, Isono C, et al.Mutations in the gene encoding p62 in Japanese patients with amyotrophiclateral sclerosis. Neurology. 2013;80(5):458-463.
[70] Yang Y, Tang L, Zhang N, Pan L, Hadano S, Fan D. Six SQSTM1 mutationsin a Chinese amyotrophic lateral sclerosis cohort. AmyotrophicLateral Sclerosis and Frontotemporal Degeneration. 2015;16(5-6):378-384.
[71] Teyssou E, Takeda T, Lebon V, Boillee S, Doukoure B, Bataillon G, et al.Mutations in SQSTM1 encoding p62 in amyotrophic lateral sclerosis: Geneticsand neuropathology. Acta Neuropathologica. 2013;125(4):511-522.
[72] Shimizu H, Toyoshima Y, Shiga A, Yokoseki A, Arakawa K, Sekine Y, et al.Sporadic ALS with compound heterozygous mutations in the SQSTM1gene. Acta Neuropathologica. 2013;126(3):453-459.
[73] Chen YP, Zheng ZZ, Chen XP, Huang R, Yang Y, YuanLX, et al. SQSTM1 mutations in Han Chinese populationswith sporadic amyotrophic lateral sclerosis. Neurobiology of Aging. 2014;35(3):726.e7-726.e9.
[74] Kwok CT, Morris A, De Belleroche JS. Sequestosome-1 (SQSTM1)sequence variants in ALS cases in the UK: Prevalence and coexistenceof SQSTM1 mutations in ALS kindred with PDB. EuropeanJournal of Human Genetics. 2014;22(4):492-496.
[75] Kim HJ, Oh KW, Kwon MJ, il Oh S, seok Park J, KimYE, et al. identification of mutations in Korean patientswith amyotrophic lateral sclerosis using multigene panel testing. Neurobiology of Aging. 2016;37:209.e9-209.e16.
[76] Narain P, Pandey A, Gupta S, Gomes J, Bhatia R, VivekanandanP. Targeted next-generation sequencing reveals novel andrare variants in Indian patients with amyotrophic lateral sclerosis. Neurobiology of Aging. 2018;71:265.e9-265.e14.
[77] Ozoguz A, Uyan O, Birdal G, Iskender C, Kartal E, Lahut S, et al. Thedistinct genetic pattern of ALS in Turkey and novel mutations. Neurobiology of Aging. 2015;36(4):1764.e9-1764.e18.
[78] Daoud H, Suhail H, Szuto A, Camu W, Salachas F, Meininger V, et al.UBQLN2 mutations are rare in French and French-Canadian amyotrophiclateral sclerosis. Neurobiol Aging.;(9):1-2230.
[79] Synofzik M, Maetzler W, Grehl T, Prudlo J, Vom Hagen JM, Haack T,et al. Screening in ALS and FTD patients reveals 3 novel UBQLN2 mutationsoutside the PXX domain and a pure FTD phenotype. NeurobiolAging. 2012;33(12):13-17.
[80] Kim HJ, Kwon MJ, Choi WJ, Oh KW, il Oh S, Ki CS,et al. Mutations in UBQLN2 and SIGMAR1 genes are rarein Korean patients with amyotrophic lateral sclerosis. Neurobiology of Aging. 2014;35(8):1957.e7-1957.e8.
[81] Kotan D, Iskender C, Ozoguz Erimis A, Basak AN. A Turkish Familywith a Familial ALS-positive UBQLN2-S340I Mutation. Noro PsikiyatriArsivi. 2016;53(3):283-285.
[82] Huang X, Shen S, Fan D. No evidence for pathogenic role of UBQLN2 mutationsin sporadic amyotrophic lateral sclerosis in the mainland Chinesepopulation. PLoS ONE. 2017;12(1):1-5.
[83] Dillen L, Van Langenhove T, Engelborghs S, Vandenbulcke M, Sarafov S,Tournev I, et al. Explorative genetic study of UBQLN2 and PFN1 in anextended Flanders-Belgian cohort of frontotemporal lobar degenerationpatients. Neurobiology of Aging. 2013;34(6):1711.e1-1711.e5.
[84] Gellera C, Tiloca C, Del Bo R, Corrado L, Pensato V, Agostini J, et al.Ubiquilin 2 mutations in Italian patients with amyotrophic lateral sclerosisand frontotemporal dementia. J Neurol Neurosurg Psychiatry. 2013;84(2):183-187.
[85] Williams KL, Warraich ST, Yang S, Solski JA, Fernando R, Rouleau GA,et al. UBQLN2/ubiquilin 2 mutation and pathology in familial amyotrophiclateral sclerosis. Neurobiol Aging. 2012;33(10):3-10.
[86] Scotter EL, Smyth L, Bailey JWT, Wong CH, de Majo M, Vance CA,et al. C9ORF72 and UBQLN2 mutations are causes of amyotrophic lateralsclerosis in New Zealand: a genetic and pathologic study using bankedhuman brain tissue. Neurobiology of Aging. 2017;49:214.e1-214.e5.
[87] Teyssou E, Chartier L, Amador MDM, Lam R, Lautrette G,Nicol M, et al. Novel UBQLN2 mutations linked to amyotrophiclateral sclerosis and atypical hereditary spastic paraplegiaphenotype through defective HSP70-mediated proteolysis. Neurobiology of Aging. 2017;58:239.e11-239.e20.
[88] Deng HX, Chen W, Hong ST, Boycott KM, Gorrie GH, Siddique N, et al.Mutations in UBQLN2 cause dominant X-linked juvenile and adult-onsetALS and ALS/dementia. Nature. 2011;477(7363):211-215.
[89] Fahed AC, McDonough B, Gouvion CM, Newell KL, Dure LS, BebinM, et al. UBQLN2 mutation causing heterogeneous X-linked dominantneurodegeneration. Ann Neurol.;(5):793-798.
[90] Millecamps S, Corcia P, Cazeneuve C, Boillee S, Seilhean D, Danel-Brunaud V, et al. Mutations in UBQLN2 are rare in French amyotrophiclateral sclerosis. Neurobiol Aging. 2012;33(4):1-3.
[91] Daoud H, Belzil V, Martins S, Sabbagh M, Provencher P, Lacomblez L,et al. Association of long ATXN2 CAG repeat sizes with increased risk ofamyotrophic lateral sclerosis. Archives of neurology. 2011;68(6):739-742
[92] Ross OA, Rutherford NJ, Baker M, Soto-Ortolaza AI, Carrasquillo MM,DeJesus-Hernandez M, et al. Ataxin-2 repeat-length variation and neurodegeneration.Human Molecular Genetics. 2011;20(16):3207-3212.
[93] Van Damme P, Veldink JH, van Blitterswijk M, Corveleyn A, van VughtPWJ, Thijs V, et al. Expanded ATXN2 CAG repeat size in ALS identiesgenetic overlap between ALS and SCA2. Neurology. 2011;76(24):2066-2072
[94] Lattante S, Conte A, Zollino M, Luigetti M, Del Grande A, Marangi G,et al. Contribution of major amyotrophic lateral sclerosis genes to theetiology of sporadic disease. Neurology. 2012;79(1):66-72.
[95] Del Bo R, Tiloca C, Pensato V, Corrado L, Ratti A, Ticozzi N, et al.Novel optineurin mutations in patients with familial and sporadic amyotrophiclateral sclerosis. Journal of Neurology, Neurosurgery and Psychiatry.2011;82(11):1239-1243.
[96] Belzil VV, Daoud H, Desjarlais A, Bouchard JP, Dupre N, Camu W,et al. Analysis of OPTN as a causative gene for amyotrophic lateralsclerosis. Neurobiology of Aging. 2011;32(3):555.e13-555.e14.
[97] Iida A, Hosono N, Sano M, Kamei T, Oshima S, Tokuda T, et al. Optineurin mutations in Japanese amyotrophic lateral sclerosis. 2012;83(2):233-5.
[98] Millecamps S, Boillee S, Chabrol E, Camu W, Cazeneuve C, Salachas F,et al. Screening of OPTN in French familial amyotrophic lateral sclerosis. Neurobiology of Aging. 2011;32(3):557.e11-557.e13.
[99] Weishaupt JH, Waibel S, Birve A, Volk AE, Mayer B, Meyer T, et al.A novel optineurin truncating mutation and three glaucoma-associatedmissense variants in patients with familial amyotrophic lateral sclerosis in Germany. Neurobiology of Aging. 2013;34(5):1516.e9-1516.e15.
[100] Bury JJ, Highley JR, Cooper-Knock J, Goodall EF, Higginbottom A,McDermott CJ, et al. Oligogenic inheritance of optineurin (OPTN)and C9ORF72 mutations in ALS highlights localisation of OPTN inthe TDP-43-negative inclusions of C9ORF72-ALS. Neuropathology.2016;36(2):125-134.
[101] Li C, Ji Y, Tang L, Zhang N, He J, Ye S, et al. Optineurin mutations in patientswith sporadic amyotrophic lateral sclerosis in China. Amyotrophiclateral sclerosis & frontotemporal degeneration. 2015;16(7-8):485-489.
[102] van Blitterswijk M, van Vught PWJ, van Es MA, Schelhaas HJ,van der Kooi AJ, de Visser M, et al. Novel optineurin mutationsin sporadic amyotrophic lateral sclerosis patients. Neurobiology of Aging. 2011;33(5):1016.e1-1016.e7.
[103] Naruse H, Takahashi Y, Kihira T, Yoshida S, Kokubo Y, Kuzuhara S,et al. Mutational analysis of familial and sporadic amyotrophic lateralsclerosis with OPTN mutations in Japanese population. Amyotrophiclateral sclerosis : ocial publication of the World Federation of NeurologyResearch Group on Motor Neuron Diseases. 2012;13(6):562-566.
[104] T umer Z, Bertelsen B, Gredal O, Magyari M, Nielsen KC, Lu-Camp, et al. A novel heterozygous nonsense mutation of theOPTN gene segregating in a Danish family with ALS. Neurobiology of Aging. 2012;33(1):208.e1-208.e5.
[105] Maruyama H, Morino H, Ito H, Izumi Y, Kato H, Watanabe Y, et al.Mutations of optineurin in amyotrophic lateral sclerosis. Nature. 2010;465(7295):223-226.
[106] Goldstein O, Nayshool O, Nefussy B, Traynor BJ, Renton AE, Gana-WeiszM, et al. OPTN 691 692insAG is a founder mutation causing recessiveALS and increased risk in heterozygotes. Neurology. 2016;86(5):446-453
[107] Pottier C, Rampersaud E, Baker M, Wu G, Wuu J, McCauley JL, et al.identification of compound heterozygous variants in OPTN in an ALSFTDpatient from the CReATe consortium: a case report. Amyotrophiclateral sclerosis & frontotemporal degeneration. 2018;19(5-6):469-471.
[108] Fifita JA, Williams KL, Sundaramoorthy V, Mccann EP, Nicholson GA,Atkin JD, et al. A novel amyotrophic lateral sclerosis mutation in OPTNinduces ER stress and Golgi fragmentation in vitro. Amyotrophic LateralSclerosis and Frontotemporal Degeneration. 2017;18(1-2).
[109] Ayaki T, Ito H, Komure O, Kamada M, Nakamura M, Wate R, et al.Multiple Proteinopathies in Familial ALS Cases With Optineurin Mutations.Journal of neuropathology and experimental neurology. 2018;77(2):128-138.
[110] Kenna KP, McLaughlin RL, Byrne S, Elamin M, Heverin M, Kenny EM,et al. Delineating the genetic heterogeneity of ALS using targeted highthroughputsequencing. Journal ofMedical Genetics. 2013;50(11):776-783.
[111] Farhan SMK, Gendron TF, Petrucelli L, Hegele RA, Strong MJ. OPTNp.Met468Arg and ATXN2 intermediate length polyQ extension in familieswith C9orf72 mediated amyotrophic lateral sclerosis and frontotemporaldementia. American Journal of Medical Genetics, Part B: NeuropsychiatricGenetics. 2018;177(1):75-85.
[112] Nishiyama A, Niihori T, Warita H, Izumi R, Akiyama T, Kato M, et al.Comprehensive targeted next-generation sequencing in Japanese familialamyotrophic lateral sclerosis. Neurobiol Aging. 2017;53:1-194.
[113] Soong BW, Lin KP, Guo YC, Lin CCK, Tsai PC, Liao YC, et al. Extensivemolecular genetic survey of Taiwanese patients with amyotrophic lateralsclerosis. Neurobiology of Aging. 2014;35(10):2423.e1-2423.e6.
[114] Chio A, Calvo A, Mazzini L, Cantello R, Mora G, Moglia C, et al. Extensivegenetics of ALS: a population-based study in Italy. Neurology. 2012;79(19):1983-1989.
[115] Czell D, Andersen PM, Neuwirth C, Morita M, Weber M. Progressiveaphasia as the presenting symptom in a patient with amyotrophic lateralsclerosis with a novel mutation in the OPTN gene. Amyotrophic lateralsclerosis & frontotemporal degeneration. 2013;14(2):138-140.
[116] Orlacchio A, Babalini C, Borreca A, Patrono C, Massa R, Basaran S, et al. SPATACSIN mutations cause autosomal recessive juvenile amyotrophiclateral sclerosis. Brain. 2010;133(2):591-598.
[117] Couthouis J, Raphael AR, Daneshjou R, Gitler AD. Targeted Exon Captureand Sequencing in Sporadic Amyotrophic Lateral Sclerosis. PLoSGenetics. 2014;10(10).
[118] Daoud H, Zhou S, Noreau A, Sabbagh M, Belzil V, Dionne-LaporteA, et al. Exome sequencing reveals SPG11 mutations causing juvenileALS. Neurobiology of Aging. 2012;33(4):839.e5-839.e9.
[119] Kwok CT,Wang HY, Morris AG, Smith B, Shaw C, De Belleroche J. VCPmutations are not a major cause of familial amyotrophic lateral sclerosisin the UK. Journal of the Neurological Sciences. 2015;349(1-2):209-213.
[120] Abramzon Y, Johnson JO, Scholz SW, Taylor JP, BrunettiM, Calvo A, et al. Valosin-containing protein (VCP) mutationsin sporadic amyotrophic lateral sclerosis. Neurobiology of Aging. 2012;33(9):2231.e1-2231.e6.
[121] Johnson JO, Mandrioli J, Benatar M, Abramzon Y, Van Deerlin VM,Trojanowski JQ, et al. Exome sequencing reveals VCP mutations as acause of familial ALS. Neuron. 2010;68(5):857-864.
[122] Tiloca C, Ratti A, Pensato V, Castucci A, Soraru G, Del Bo R, et al.Mutational analysis of VCP gene in familial amyotrophic lateral sclerosis. Neurobiology of Aging. 2012;33(3):630.e1-630.e2.
[123] Hirano M, Nakamura Y, Saigoh K, Sakamoto H, Ueno S, IsonoC, et al. VCP gene analyses in Japanese patients with sporadicamyotrophic lateral sclerosis identify a new mutation. Neurobiology of Aging. 2015;36(3):1604.e1-1604.e6.
[124] Koppers M, van Blitterswijk MM, Vlam L, Rowicka PA, van Vught PWJ,Groen EJN, et al. VCP mutations in familial and sporadic amyotrophiclateral sclerosis. Neurobiology of Aging. 2012;33(4):837.e7-837.e13.
[125] Segawa M, Hoshi A, Naruse H, Kuroda M, Bujo H, Ugawa Y. A patientwith familial amyotrophic lateral sclerosis associated with a new valosincontainingprotein (VCP) gene mutation. Rinsho shinkeigaku (Clinical neurology). 2015;55(12):914-920.
[126] Nakamura R, Sone J, Atsuta N, Tohnai G, Watanabe H, Yokoi D, et al.Next-generation sequencing of 28 ALS-related genes in a Japanese ALScohort. Neurobiology of Aging. 2016;39:219.e1-219.e8.
[127] DeJesus-Hernandez M, Desaro P, Johnston A, Ross OA, Wszolek ZK,Ertekin-Taner N, et al. Novel p.Ile151Val mutation in VCP in a patientof African American descent with sporadic ALS. Neurology. 2011;77(11):1102-1103.
[128] Abrahao A, Abath Neto O, Kok F, Zanoteli E, Santos B, Pinto WBVdR,et al. One family, one gene and three phenotypes: A novel VCP(valosin-containing protein) mutation associated with myopathy withrimmed vacuoles, amyotrophic lateral sclerosis and frontotemporal dementia.Journal of the Neurological Sciences. 2016;368:352-358.
[129] Brown JA, Min J, Staropoli JF, Collin E, Bi S, Feng X, et al. SOD1,ANG, TARDBP and FUS mutations in amyotrophic lateral sclerosis: AUnited States clinical testing lab experience. Amyotrophic Lateral Sclerosis.2012;13(2):217-222.
[130] Gellera C, Colombrita C, Ticozzi N, Castellotti B, Bragato C, Ratti A,et al. identification of new ANG gene mutations in a large cohort of Italianpatients with amyotrophic lateral sclerosis. Neurogenetics. 2008;9(1):33-40
[131] Marjanovic IV, Selak-Djokic B, Peric S, Jankovic M, Arsenijevic V, BastaI, et al. Comparison of the clinical and cognitive features of geneticallypositive ALS patients from the largest tertiary center in Serbia. Journalof Neurology. 2017;264(6):1091-1098.
[132] Fernandez-Santiago R, Hoenig S, Lichtner P, Sperfeld AD, Sharma M,Berg D, et al. identification of novel Angiogenin (ANG) gene missensevariants in German patients with amyotrophic lateral sclerosis. Journalof Neurology. 2009;256(8):1337-1342.
[133] van Blitterswijk M, van Es MA, Hennekam EA, Dooijes D, van RheenenW, Medic J, et al. Evidence for an oligogenic basis of amyotrophic lateralsclerosis. Hum Mol Genet. 2012;21(17):3776-3784.
[134] Wu D, Yu W, Kishikawa H, Folkerth RD, Iafrate AJ, Shen Y, et al. Angiogeninloss-of-function mutations in amyotrophic lateral sclerosis. Annalsof Neurology. 2007;62(6):609-617.
[135] Greenway MJ, Andersen PM, Russ G, Ennis S, Cashman S, Donaghy C,et al. ANG mutations segregate with familial and 'sporadic' amyotrophiclateral sclerosis. Nature Genetics. 2006;38(4):411-413.
[136] van Es MA, Diekstra FP, Veldink JH, Baas F, Bourque PR, SchelhaasHJ, et al. A case of ALS-FTD in a large FALS pedigree with a K17I ANGmutation. Neurology. 2009;72(3):287-288.
[137] Millecamps S, Salachas F, Cazeneuve C, Gordon P, Bricka B, CamuzatA, et al. SOD1, ANG, VAPB, TARDBP, and FUS mutations in familialamyotrophic lateral sclerosis: Genotype-phenotype correlations. Journalof Medical Genetics. 2010;47(8):554-560.
[138] van Blitterswijk M, Vlam L, van Es MA, van der Pol WL, HennekamEA, Dooijes D, et al. Genetic overlap between apparently sporadic motorneuron diseases. PLoS ONE. 2012;7(11):e48983.
[139] Williams KL, Fifita JA, Vucic S, Durnall JC, Kiernan MC, Blair IP, et al.Pathophysiological insights into ALS with C9ORF72 expansions. J NeurolNeurosurg Psychiatr. 2013;84(8):931-935.
[140] Pan L, Deng X, Ding D, Leng H, Zhu X, Wang Z. Association betweenthe Angiogenin (ANG) K17I variant and amyotrophic lateral sclerosis riskin Caucasian: a meta-analysis. Neurological Sciences. 2015;36(12):2163-2168
[141] Paubel A, Violette J, Amy M, Praline J, Meininger V, Camu W, et al.Mutations of the ANG gene in French patients with sporadic amyotrophiclateral sclerosis. Archives of neurology. 2008;65(10):1333-1336.
[142] Takahashi Y, Seki N, Ishiura H, Mitsui J, Matsukawa T, Kishino A, et al.Development of a high-throughput microarray-based resequencing systemfor neurological disorders and its application to molecular geneticsof amyotrophic lateral sclerosis. Archives of neurology. 2008;65(10):1326-32.
[143] Zou ZY, Wang XN, Liu MS, Sun Q, Li XG, Cui LY, et al. identification ofa novel missense mutation in angiogenin in a Chinese amyotrophic lateralsclerosis cohort. Amyotrophic Lateral Sclerosis. 2012;13(3):270-275.
[144] Zou ZY, Liu MS, Li XG, Cui LY. The distinctive genetic architecture of ALS in mainland China. Journal of Neurology, Neurosurgery and Psychiatry.2016;87(8):906-907.
[145] Luigetti M, Lattante S, Zollino M, Conte A, Marangi G, Del GrandeA, et al. SOD1 G93D sporadic amyotrophic lateral sclerosis (SALS)patient with rapid progression and concomitant novel ANG variant. Neurobiology of Aging. 2011;32(10):1924.e15-1924.e18.
[146] Kwee LC, Liu Y, Haynes C, Gibson JR, Stone A, Schichman SA, et al. Ahigh-density genome-wide association screen of sporadic als in US veterans.PLoS ONE. 2012;7(3).
[147] Simpson CL, Lemmens R, Miskiewicz K, Broom WJ, Hansen VK, vanVught PW, et al. Variants of the elongator protein 3 (ELP3) geneare associated with motor neuron degeneration. Hum Mol Genet. 2009;18(3):472-481.
[148] Yan J, Deng HX, Siddique N, Fecto F, Chen W, Yang Y, et al. Frameshiftand novel mutations in FUS in familial amyotrophic lateral sclerosis andALS/dementia. Neurology. 2010;75(9):807-814.
[149] Belzil VV, Daoud H, St-Onge J, Desjarlais A, Bouchard JP, Dupre N, et al.identification of novel FUS mutations in sporadic cases of amyotrophiclateral sclerosis. Amyotrophic Lateral Sclerosis. 2011;12(2):113-117.
[150] Belzil VV, Valdmanis PN, Dion PA, Daoud H, Kabashi E, Noreau A, et al.Mutations in FUS cause FALS and SALS in French and French Canadianpopulations. Neurology. 2009;73(15):1176-1179.
[151] Ticozzi N, Silani V, LeClerc AL, Keagle P, Gellera C, Ratti A, et al.Analysis of FUS gene mutation in familial amyotrophic lateral sclerosiswithin an Italian cohort. Neurology. 2009;73(15):1180-1185.
[152] Corrado L, Del Bo R, Castellotti B, Ratti A, Cereda C, Penco S, et al.Mutations of FUS gene in sporadic amyotrophic lateral sclerosis. Journalof Medical Genetics. 2010;47(3):190-194.
[153] Kwiatkowski TJ, Bosco DA, Leclerc AL, Tamrazian E, Vanderburg CR,Russ C, et al. Mutations in the FUS/TLS gene on chromosome 16 causefamilial amyotrophic lateral sclerosis. Science. 2009;323(5918):1205-1208
[154] Hewitt C, Kirby J, Highley JR, Hartley JA, Hibberd R, Hollinger HC,et al. Novel FUS/TLS mutations and pathology in familial and sporadicamyotrophic lateral sclerosis. Archives of neurology. 2010;67(4):455-461
[155] Rademakers R, Stewart H, Dejesus-Hernandez M, Krieger C, Gra-Radford N, Fabros M, et al. FUS gene mutations in familial and sporadicamyotrophic lateral sclerosis. Muscle and Nerve. 2010;42(2):170-176.
[156] Bertolin C, D'Ascenzo C, Querin G, Gaiani A, Boaretto F,Salvoro C, et al. Improving the knowledge of amyotrophic lateralsclerosis genetics: Novel SOD1 and FUS variants. Neurobiology of Aging. 2014;35(5):1212.e7-1212.e10.
[157] Kwon MJJ, Baek W, Ki CSS, Kim HY, Koh SHH, Kim JWW, et al.Screening of the SOD1, FUS, TARDBP, ANG, and OPTN mutations inKorean patients with familial and sporadic ALS. Neurobiol Aging. 2012;33(5):17-23.
[158] Tarlarini C, Lunetta C, Mosca L, Avemaria F, Riva N, Mantero V, et al.Novel FUS mutations identied through molecular screening in a largecohort of familial and sporadic amyotrophic lateral sclerosis. EuropeanJournal of Neurology. 2015;22(11):1474-1481.
[159] DeJesus-Hernandez M, Kocerha J, Finch N, Crook R, Baker M, DesaroP, et al. De novo truncating FUS gene mutation as a cause of sporadicamyotrophic lateral sclerosis. Human Mutation. 2010;31(5):1377-1389.
[160] Groen EJN, van Es MA, van Vught PWJ, SplietWGM, van Engelen-Lee J,de Visser M, et al. FUS mutations in familial amyotrophic lateral sclerosisin the Netherlands. Archives of neurology. 2010;67(2):224-230.
[161] Nagayama S, Minato-Hashiba N, Nakata M, Kaito M, Nakanishi M,Tanaka K, et al. Novel FUS mutation in patients with sporadicamyotrophic lateral sclerosis and corticobasal degeneration. Journalof Clinical Neuroscience. 2012;19(12):1738-1739.
[162] Hara M, Minami M, Kamei S, Suzuki N, Kato M, Aoki M. Lower motorneuron disease caused by a novel FUS/TLS gene frameshift mutation.Journal of Neurology. 2012;259(10):2237-2239.
[163] Akiyama T, Warita H, Kato M, Nishiyama A, Izumi R, Ikeda C, et al.Genotype-phenotype relationships in familial amyotrophic lateral sclerosiswith FUS/TLS mutations in Japan. Muscle and Nerve. 2016;54(3):398-404
[164] Waibel S, Neumann M, Rosenbohm A, Birve A, Volk AE, Weishaupt JH,et al. Truncating mutations in FUS/TLS give rise to a more aggressiveALS-phenotype than missense mutations: A clinico-genetic study in Germany.European Journal of Neurology. 2013;20(3):540-546.
[165] Liu ZJ, Lin HX, Liu GL, Tao QQ, Ni W, Xiao BG, et al. The investigationof genetic and clinical features in Chinese patients with juvenileamyotrophic lateral sclerosis. Clinical Genetics. 2017;92(3):267-273.
[166] Yamashita S, Mori A, Sakaguchi H, Suga T, Ishihara D, Ueda A, et al. Sporadicjuvenile amyotrophic lateral sclerosis caused by mutant FUS/TLS:Possible association of mental retardation with this mutation. Journal ofNeurology. 2012;259(6):1039-1044.
[167] Zou ZY, Liu MS, Li XG, Cui LY. Mutations in SOD1 and FUS causedjuvenile-onset sporadic amyotrophic lateral sclerosis with aggressive progression.Annals of translational medicine. 2015;3(15):221.
[168] Waibel S, Neumann M, Rabe M, Meyer T, Ludolph AC. Novel missenseand truncating mutations in FUS/TLS in familial ALS. Neurology. 2010;75(9):815-817.
[169] Zou ZY, Cui LY, Sun Q, Li XG, Liu MS, Xu Y, et al. De novo FUS genemutations are associated with juvenile-onset sporadic amyotrophic lateralsclerosis in China. Neurobiol Aging. 2013;34(4):1-8.
[170] Calvo A, Moglia C, Canosa A, Brunetti M, Barberis M, TraynorBJ, et al. A de novo nonsense mutation of the FUS gene inan apparently familial amyotrophic lateral sclerosis case. Neurobiology of Aging. 2014;35(6):1513.e7-1513.e11.
[171] Kim YE, Oh KW, Kwon MJ, Choi WJ, il Oh S, Ki CS, et al. De novoFUS mutations in 2 Korean patients with sporadic amyotrophic lateralsclerosis. Neurobiology of Aging. 2015;36(3):1604.e17-1604.e19.
[172] Zou ZY, Liu MS, Li XG, Cui LY. Mutations in FUS are the most frequentgenetic cause in juvenile sporadic ALS patients of Chinese origin. AmyotrophicLateral Sclerosis and Frontotemporal Degeneration. 2016;17(3-4):249-252.
[173] Belzil VV, Langlais JS, Daoud H, Dion PA, Brais B, Rouleau GA. NovelFUS deletion in a patient with juvenile amyotrophic lateral sclerosis.Archives of neurology. 2012;69(5):653-656.
[174] H ubers A, Just W, Rosenbohm A, M uller K, Marroquin N, Goebel I,et al. De novo FUS mutations are the most frequent genetic cause in earlyonsetGerman ALS patients. Neurobiology of Aging. 2015;36(11):3117.e1-3117.e6.
[175] Kent L, Vizard TN, Smith BN, Topp SD, Vance C, Gkazi A, et al. Autosomaldominant inheritance of rapidly progressive amyotrophic lateralsclerosis due to a truncation mutation in the fused in sarcoma (FUS)gene. Amyotrophic Lateral Sclerosis and Frontotemporal Degeneration.2014;15(7-8):557-562.
[176] Lai SL, Abramzon Y, Schymick JC, Stephan DA, Dunckley T, DillmanA, et al. FUS mutations in sporadic amyotrophic lateral sclerosis. Neurobiology of Aging. 2011;32(3):550.e1-550.e4.
[177] Suzuki N, Aoki M, Warita H, Kato M, Mizuno H, Shimakura N, et al.FALS with FUS mutation in Japan, with early onset, rapid progressand basophilic inclusion. Journal of Human Genetics. 2010;55(4):252-254.
[178] Syriani E, Morales M, Gamez J. FUS/TLS gene mutations are the secondmost frequent cause of familial ALS in the Spanish population. AmyotrophicLateral Sclerosis. 2011;12(2):118-123.
[179] Mochizuki Y, Kawata A, Maruyama H, Homma T, Watabe K, KawakamiH, et al. A Japanese patient with familial ALS and a p.K510M mutationin the gene for FUS (FUS) resulting in the totally locked-in state.Neuropathology. 2014;34(5):504-509.
[180] Vance C, Rogelj B, Hortobagyi T, De Vos KJ, Nishimura AL, SreedharanJ, et al. Mutations in FUS, an RNA processing protein, cause familialamyotrophic lateral sclerosis type 6. Science.;(5918):1208-1211.
[181] Robertson J, Bilbao J, Zinman L, Hazrati LN, Tokuhiro S, Sato C,et al. A novel double mutation in FUS gene causing sporadic ALS. Neurobiology of Aging. 2011;32(3):553.e27-553.e30.
[182] Chio A, Restagno G, Brunetti M, Ossola I, Calvo A, Mora G, et al. TwoItalian kindreds with familial amyotrophic lateral sclerosis due to FUSmutation. Neurobiology of Aging. 2009;30(8):1272-1275.
[183] Tsai CP, Soong BW, Lin KP, Tu PH, Lin JL, Lee YC. FUS, TARDBP, andSOD1 mutations in a Taiwanese cohort with familial ALS. Neurobiology of Aging. 2011;32(3):553.e13-553.e21.
[184] Gromicho M, Oliveira Santos M, Pinto A, Pronto-Laborinho A, De CarvalhoM. Young-onset rapidly progressive ALS associated with heterozygousFUS mutation. Amyotrophic Lateral Sclerosis and FrontotemporalDegeneration. 2017;18(5-6):451-453.
[185] Baumer D, Hilton D, Paine SML, Turner MR, Lowe J, Talbot K, et al.Juvenile ALS with basophilic inclusions is a FUS proteinopathy with FUSmutations. Neurology. 2010;75(7):611-618.
[186] Sproviero W, La Bella V, Mazzei R, Valentino P, Rodolico C, Simone IL,et al. FUS mutations in sporadic amyotrophic lateral sclerosis: Clinicaland genetic analysis. Neurobiology of Aging. 2012;33(4):837.e1-837.e5.
[187] Blair IP, Williams KL, Warraich ST, Durnall JC, Thoeng AD, ManavisJ, et al. FUS mutations in amyotrophic lateral sclerosis: clinical, pathological,neurophysiological and genetic analysis. J Neurol Neurosurg Psychiatr.2010;81(6):639-645.
[188] Tateishi T, Hokonohara T, Yamasaki R, Miura S, Kikuchi H, IwakiA, et al. Multiple system degeneration with basophilic inclusions inJapanese ALS patients with FUS mutation. Acta Neuropathologica.2010;119(3):355-364.
[189] Yamamoto-Watanabe Y, Watanabe M, Okamoto K, Fujita Y, JacksonM, Ikeda M, et al. A Japanese ALS6 family with mutation R521C inthe FUS/TLS gene: A clinical, pathological and genetic report. Journalof the Neurological Sciences. 2010;296(1-2):59-63.
[190] Chio A, Calvo A, Moglia C, Ossola I, Brunetti M, Sbaiz L, et al. Ade novo missense mutation of the FUS gene in a "true" sporadic ALScase. Neurobiology of Aging. 2011;32(3):23-26.
[191] Drepper C, Herrmann T, Wessig C, Beck M, Sendtner M. CterminalFUS/TLS mutations in familial and sporadic ALS in Germany. Neurobiology of Aging. 2011;32(3):548.e1-548.e4.
[192] Kono S, Ouchi Y, Terada T, Suzuki M, Yagi S, Miyajima H. CombinedFDG and raclopride PET study in a case of ALS with the R521C FUSgene mutation. Journal of Neurology. 2012;259(2):367-369.
[193] Mochizuki Y, Isozaki E, Takao M, Hashimoto T, Shibuya M, Arai M, et al.Familial ALS with FUS P525L mutation: Two Japanese sisters with multiplesystems involvement. Journal of the Neurological Sciences. 2012;323(1-2):85-92.
[194] McCann EP, Williams KL, Fifita JA, Tarr IS, O'Connor J, Rowe DB,et al. The genotype-phenotype landscape of familial amyotrophic lateralsclerosis in Australia. Clin Genet. 2017;92(3):259-266.
[195] Damme PV, Goris A, Race V, Hersmus N, Dubois B, Van Den Bosch L,et al. The occurrence of mutations in FUS in a Belgian cohort of patientswith familial ALS. European Journal of Neurology. 2010;17(5):754-756.
[196] Zou ZY, Peng Y, Feng XH, Wang XN, Sun Q, Liu MS, et al. Screeningof the FUS gene in familial and sporadic amyotrophic lateral sclerosispatients of Chinese origin. European journal of neurology. 2012;19(7):977-983.
[197] Hou L, Jiao B, Xiao T, Zhou L, Zhou Z, Du J, et al. Screening of SOD1,FUS and TARDBP genes in patients with amyotrophic lateral sclerosis incentral-southern China. Scientic Reports. 2016; 6:32478.
[198] Oda M, Izumi Y, Kaji R. Gene mutations in familial amyotrophic lateralsclerosis. Brain and Nerve. 2011;63(2):165-170.
[199] Conte A, Lattante S, Zollino M, Marangi G, Luigetti M, Del Grande A,et al. P525L FUS mutation is consistently associated with a severe form ofjuvenile amyotrophic lateral sclerosis. Neuromuscul Disord.;(1):73-75.
[200] Leblond CS, Webber A, Gan-Or Z, Moore F, Dagher A, Dion PA, et al.De novo FUS P525L mutation in Juvenile amyotrophic lateral sclerosiswith dysphonia and diplopia. Neurology Genetics. 2016;2(2):e63.
[201] Eura N, Sugie K, Suzuki N, Kiriyama T, Izumi T, Shimakura N, et al. Ajuvenile sporadic amyotrophic lateral sclerosis case with P525L mutationin the FUS gene: A rare co-occurrence of autism spectrum disorder andtremor.; 2019.
[202] Corcia P, Danel V, Lacour A, Beltran S, Andres C, Couratier P, et al. Anovel mutation of the C-terminal amino acid of FUS (Y526C) strengthensFUS gene as the most frequent genetic factor in aggressive juvenileALS. Amyotrophic Lateral Sclerosis and Frontotemporal Degeneration.2017;18(3-4):298-301.
[203] Sabatelli M, Moncada A, Contel A, Lattante S, Marangi G, Luigetti M,et al. Mutations in the 3 untranslated region of FUS causing FUS overexpressionare associated with amyotrophic lateral sclerosis. Human MolecularGenetics. 2013;22(23):4748-4755.
[204] Kirby J, Goodall EF, Smith W, Highley JR, Masanzu R, Hartley JA,et al. Broad clinical phenotypes associated with TAR-DNA binding protein(TARDBP) mutations in amyotrophic lateral sclerosis. Neurogenetics.2010;11(2):217-225.
[205] Chiang HH, Andersen PM, Tysnes OB, Gredal O, Christensen PB, GraC. Novel TARDBP mutations in Nordic ALS patients. Journal of HumanGenetics. 2012;57(5):316-319.
[206] Czell D, Andersen PM, Morita M, Neuwirth C, Perren F, Weber M. Phenotypesin Swiss patients with familial ALS carrying TARDBP mutations.Neuro-degenerative diseases. 2013;12(3):150-155.
[207] Kabashi E, Valdmanis PN, Dion P, Spiegelman D, McConkey BJ, VandeVelde C, et al. TARDBP mutations in individuals with sporadic andfamilial amyotrophic lateral sclerosis. Nat Genet. 2008;40(5):572-574
[208] Corrado L, Ratti A, Gellera C, Buratti E, Castellotti B, Carlomagno Y,et al. High frequency of TARDBP gene mutations in italian patients withamyotrophic lateral sclerosis. Human Mutation. 2009;30(4):688-694.
[209] Van Deerlin VM, Leverenz JB, Bekris LM, Bird TD, Yuan W, Elman LB,et al. TARDBP mutations in amyotrophic lateral sclerosis with TDP-43 neuropathology: a genetic and histopathological analysis. The LancetNeurology. 2008;7(5):409-416.
[210] Xiong H, Wang J, Sun Y, Wu J, Chen Y, Qiao K, et al. Association betweennovel TARDBP mutations and Chinese patients with amyotrophiclateral sclerosis. BMC Medical Genetics. 2010;11(1).
[211] Zou ZY, Peng Y, Wang XN, Liu MS, Li XG, Cui LY. Screening ofthe TARDBP gene in familial and sporadic amyotrophic lateral sclerosispatients of Chinese origin. Neurobiology of Aging. 2012;33(9):2229.e11-2229.e18.
[212] Sreedharan J, Blair IP, Tripathi VB, Hu X, Vance C, Rogelj B, et al.TDP-43 mutations in familial and sporadic amyotrophic lateral sclerosis.Science. 2008;319(5870):1668-1672.
[213] Del Bo R, Ghezzi S, Corti S, Pandolfo M, Ranieri M, Santoro D, et al.TARDBP (TDP-43) sequence analysis in patients with familial and sporadicALS: identification of two novel mutations. European Journal ofNeurology. 2009;16(6):727-732.
[214] Williams KL, Durnall JC, Thoeng AD, Warraich ST, Nicholson GA, BlairIP. A novel TARDBP mutation in an Australian amyotrophic lateralsclerosis kindred. J Neurol Neurosurg Psychiatr.;(11):1286-1288.
[215] Conforti FL, Sproviero W, Simone IL, Mazzei R, Valentino P, Ungaro C,et al. TARDBP gene mutations in south Italian patients with amyotrophiclateral sclerosis.; 2011.
[216] Piaceri I, Del Mastio M, Tedde A, Bagnoli S, Latorraca S, Massaro F,et al. Clinical heterogeneity in Italian patients with amyotrophic lateralsclerosis. Clinical Genetics. 2012;82(1):83-87.
[217] Ticozzi N, LeClerc AL, van Blitterswijk M, Keagle P, McKenna-YasekDM, Sapp PC, et al. Mutational analysis of TARDBP in neurodegenerativediseases. Neurobiology of Aging. 2011;32(11):2096-2099.
[218] Benajiba L, Ber IL, Camuzat A, Lacoste M, Thomas-Anterion C,Couratier P, et al. TARDBP mutations in motoneuron disease with frontotemporallobar degeneration. Annals of Neurology. 2009;65(4):470-474.
[219] Borghero G, Pugliatti M, Marrosu F, Marrosu MG, Murru MR, Floris G,et al. Genetic architecture of ALS in Sardinia. Neurobiology of Aging.2014;35(12):2882.e7-2882.e12.
[220] Nozaki I, Arai M, Takahashi K, Hamaguchi T, Yoshikawa H, Muroishi T,et al. Familial ALS with G298S Mutation in TARDBP: A Comparison ofCSF Tau Protein Levels with those in Sporadic ALS. Internal Medicine.2010;49(12):1209-1212.
[221] Lemmens R, Race V, Hersmus N, Matthijs G, Van Den Bosch L, VanDamme P, et al. TDP-43 M311V mutation in familial amyotrophiclateral sclerosis. Journal of Neurology, Neurosurgery and Psychiatry.2009;80(3):354-355.
[222] Gitcho MA, Baloh RH, Chakraverty S, Mayo K, Norton JB, Levitch D,et al. TDP-43 A315T mutation in familial motor neuron disease. Annalsof Neurology. 2008;63(4):535-538.
[223] Fujita Y, Ikeda M, Yanagisawa T, Senoo Y, Okamoto K. Dierent clinicaland neuropathologic phenotypes of familial ALS with A315E TARDBP mutation. Neurology. 2011;77(15):1427-1431.
[224] B aumer D, Parkinson N, Talbot K. TARDBP in amyotrophic lateralsclerosis: identification of a novel variant but absence of copynumber variation. Journal of Neurology, Neurosurgery and Psychiatry.2009;80(11):1283-1285.
[225] Rutherford NJ, Zhang YJ, Baker M, Gass JM, Finch NCA, Xu YF,et al. Novel mutations in TARDBP(TDP-43) in patients with familialamyotrophic lateral sclerosis. PLoS Genetics. 2008;4(9):1-8.
[226] Tamaoka A, Arai M, Itokawa M, Arai T, Hasegawa M, Tsuchiya K,et al. TDP-43 M337V mutation in familial amyotrophic lateral sclerosisin Japan. Internal medicine (Tokyo, Japan). 2010;49(4):331-334.
[227] Ju XD, Liu WC, Li XG, Liu N, Zhang N, Liu T, et al. Two distinctclinical features and cognitive impairment in amyotrophic lateralsclerosis patients with TARDBP gene mutations in the Chinese population. Neurobiology of Aging. 2015;38:216.e1-216.e6.
[228] Xu GR, Hu W, Zhan LL, Wang C, Xu LQ, Lin MT, et al. Highfrequency of the TARDBP p.M337V mutation among south-eastern Chinesepatients with familial amyotrophic lateral sclerosis. BMC Neurology.2018;18(1):1-6.
[229] Yokoseki A, Shiga A, Tan CF, Tagawa A, Kaneko H, Koyama A, et al.TDP-43 mutation in familial amyotrophic lateral sclerosis. Annals of Neurology.2008;63(4):538-542.
[230] Kuhnlein P, Sperfeld AD, Vanmassenhove B, Van Deerlin V, Lee VMY,Trojanowski JQ, et al. Two German kindreds with familial amyotrophiclateral sclerosis due to TARDBP mutations. Archives of neurology. 2008;65(9):1185-1189.
[231] Daoud H, Valdmanis PN, Kabashi E, Dion P, Dupre N, Camu W, et al.Contribution of TARDBP mutations to sporadic amyotrophic lateral sclerosis.Journal of Medical Genetics. 2009;46(2):112-114.
[232] Khani M, Alavi A, Shamshiri H, Zamani B, Hassanpour H, Kazemi MH,et al. Mutation screening of SLC52A3, C19orf12, and TARDBP in IranianALS patients. Neurobiology of aging. 2019;75:225.e9-225.e14.
[233] Kamada M, Maruyama H, Tanaka E, Morino H, Wate R, Ito H, et al.Screening for TARDBP mutations in Japanese familial amyotrophic lateralsclerosis. Journal of the Neurological Sciences. 2009;284(1-2):69-71.
[234] Iida A, Kamei T, Sano M, Oshima S, Tokuda T, Nakamura Y, et al. Largescalescreening of TARDBP mutation in amyotrophic lateral sclerosis inJapanese. Neurobiology of aging. 2012;33(4):786-790.
[235] De Marco G, Lupino E, Calvo A, Moglia C, Buccinna B, Grifoni S, et al.Cytoplasmic accumulation of TDP-43 in circulating lymphomonocytes ofALS patients with and without TARDBP mutations. Acta Neuropathologica.2011;121(5):611-622.
[236] Solski JA, Yang S, Nicholson GA, Luquin N, Williams KL, Fernando R,et al. A novel TARDBP insertion/deletion mutation in the ail armvariant of amyotrophic lateral sclerosis. Amyotroph Lateral Scler. 2012;13(5):465-470.
[237] Mitsuzawa S, Akiyama T, Nishiyama A, Suzuki N, Kato M, WaritaH, et al. TARDBP p.G376D mutation, found in rapid progressive familialALS, induces mislocalization of TDP-43. eNeurologicalSci. 2018;11:20-22.
[238] Huang R, Fang DF, Ma MY, Guo XY, Zhao B, Zeng Y, et al. TARDBPgene mutations among Chinese patients with sporadic amyotrophic lateralsclerosis. Neurobiology of Aging. 2012;33(5):1015.e1-1015.e6.
[239] Chio A, Calvo A, Moglia C, Restagno G, Ossola I, Brunetti M, et al.Amyotrophic lateral sclerosis-frontotemporal lobar dementia in 3 familieswith p.Ala382Thr TARDBP mutations. Archives of neurology. 2010;67(8):1002-1009.
[240] Borghero G, Floris G, Cannas A, Marrosu MG, Murru MR, CostantinoE, et al. A patient carrying a homozygous p.A382T TARDBP missensemutation shows a syndrome including ALS, extrapyramidal symptoms,and FTD. Neurobiology of Aging. 2011;32(12):2327.e1-2327.e5.
[241] Chio A, Borghero G, Pugliatti M, Ticca A, Calvo A, Moglia C, et al.Large proportion of amyotrophic lateral sclerosis cases in Sardinia dueto a single founder mutation of the TARDBP gene. Arch Neurol. 2011;68(5):594-598.
[242] Mosca L, Lunetta C, Tarlarini C, Avemaria F, Maestri E, MelazziniM, et al. Wide phenotypic spectrum of the TARDBP gene: Homozygosityof A382T mutation in a patient presenting with amyotrophiclateral sclerosis, Parkinson's disease, and frontotemporal lobardegeneration, and in neurologically healthy subject. Neurobiology of Aging. 2012;33(8):1846.e1-1846.e4.
[243] Orru S, Manolakos E, Orru N, Kokotas H, Mascia V, Carcassi C,et al. High frequency of the TARDBP p.Ala382Thr mutation in Sardinian patients with amyotrophic lateral sclerosis. Clinical Genetics.2012;81(2):172-178.
[244] Origone P, Caponnetto C, Bandettini Di Poggio M, Ghiglione E, BelloneE, Ferrandes G, et al. Enlarging clinical spectrum of FALS with TARDBP gene mutations: S393L variant in an Italian family showing phenotypic variability and relevance for genetic counselling. Amyotrophic LateralSclerosis. 2010;11(1-2):223-227.
[245] Praline J, Vourc'h P, Guennoc AM, Veyrat-Durebex C, Corcia P. Cooccurrenceof progressive anarthria with an S393L TARDBP mutation and ALS within a family. Amyotrophic lateral sclerosis : official publication of the World Federation of Neurology Research Group on Motor NeuronDiseases. 2012;13(1):155-157.
[246] Parkinson N, Ince PG, Smith MO, Highley R, Skibinski G, Andersen PM,et al. ALS phenotypes with mutations in CHMP2B (charged multivesicularbody protein 2B). Neurology.;(6):1074-1077.
[247] Cox LE, Ferraiuolo L, Goodall EF, Heath PR, Higginbottom A, Mortiboys H, et al. Mutations in CHMP2B in lower motor neuron predominantamyotrophic lateral sclerosis (ALS). PLoS ONE. 2010;5(3).
[248] Chen HJ, Anagnostou G, Chai A, Withers J, Morris A, Adhikaree J, et al. Characterization of the properties of a novel mutation in VAPB in familialamyotrophic lateral sclerosis. The Journal of biological chemistry. 2010;285(51):40266-40281.
[249] Nishimura AL, Mitne-Neto M, Silva HC, Richieri-Costa A, Middleton S,Cascio D, et al. A mutation in the vesicle-tracking protein VAPB causeslate-onset spinal muscular atrophy and amyotrophic lateral sclerosis. AmJ Hum Genet.;(5):822-831.
[250] Landers JE, Leclerc AL, Shi L, Virkud A, Cho T, Maxwell MM, et al.New VAPB deletion variant and exclusion of VAPB mutations in familialALS. Neurology. 2008;70(14):1179-1185.
[251] Chadi G, Maximino JR, Jorge FMdH, de Borba FC, Gilio JM, Callegaro D, et al. Genetic analysis of patients with familial and sporadic amyotrophiclateral sclerosis in a Brazilian Research Center. AmyotrophicLateral Sclerosis and Frontotemporal Degeneration. 2017;18(3-4):249-255.
[252] Sun YM, Dong Y, Wang J, Lu JH, Chen Y, Wu JJ. A novel mutationof VAPB in one Chinese familial amyotrophic lateral sclerosis pedigree and its clinical characteristics. Journal of Neurology. 2017;264(12):2387-2393
[253] Kabashi E, El Oussini H, Bercier V, Gros-Louis F, Valdmanis PN,Mcdearmid J, et al. Investigating the contribution of VAPB/ALS8 lossof function in amyotrophic lateral sclerosis. Human Molecular Genetics.2013;22(12):2350-2360.
[254] van Blitterswijk M, van Es MA, Koppers M, van Rheenen W, Medic J, Schelhaas HJ, et al. VAPB and C9orf72 mutations in 1 familial amyotrophiclateral sclerosis patient. Neurobiol Aging. 2012;33(12):1-4.
[255] Munch C, Sedlmeier R, Meyer T, Homberg V, Sperfeld AD, Kurt A, et al.Point mutations of the p150 subunit of dynactin (DCTN1) gene in ALS.Neurology. 2004;63(4):724-726.
[256] M unch C, Rosenbohm A, Sperfeld AD, Uttner I, Reske S, Krause BJ,et al. Heterozygous R1101K mutation of the DCTN1 gene in a familywith ALS and FTD. Annals of Neurology. 2005;58(5):777-780.
[257] Liu X, Yang L, Tang L, Chen L, Liu X, Fan D. DCTN1 gene analysis inChinese patients with sporadic amyotrophic lateral sclerosis. PLoS ONE.2017;12(8):1-8.
[258] Puls I, Jonnakuty C, LaMonte BH, Holzbaur ELF, Tokito M, MannE, et al. Mutant dynactin in motor neuron disease. Nature Genetics.2003;33(4):455-456.
[259] Sheerin UM, Schneider SA, Carr L, Deuschl G, Hopfner F, Stamelou M,et al. ALS2 mutations: juvenile amyotrophic lateral sclerosis and generalizeddystonia. Neurology. 2014;82(12):1065-1067.
[260] Shirakawa K, Suzuki H, Ito M, Kono S, Uchiyama T, Ohashi T, et al. Novelcompound heterozygous ALS2 mutations cause juvenile amyotrophic lateralsclerosis in Japan. Neurology. 2009;73(24):2124-2126.
[261] Luigetti M, Lattante S, Conte A, Romano A, Zollino M, Marangi G, et al.A novel compound heterozygous ALS2 mutation in two Italian siblingswith juvenile amyotrophic lateral sclerosis . Amyotrophic Lateral Sclerosisand Frontotemporal Degeneration. 2013;14(5-6):470-472.
[262] Yang Y, Hentati A, Deng HX, Dabbagh O, Sasaki T, Hirano M, et al. Thegene encoding alsin, a protein with three guanine-nucleotide exchange factordomains, is mutated in a form of recessive amyotrophic lateral sclerosis.Nature Genetics. 2001;29(2):160-165.
[263] Panzeri C, De Palma C, Martinuzzi A, Daga A, De Polo G, Bresolin N,et al. The rst ALS2 missense mutation associated with JPLS reveals newaspects of alsin biological function. Brain. 2006;129(7):1710-1719.
[264] Hadano S, Hand CK, Osuga H, Yanagisawa Y, Otomo A, Devon RS,et al. A gene encoding a putative GTPase regulator is mutated in familialamyotrophic lateral sclerosis 2. Nat Genet.;(2):166-173.
[265] Kress JA, Kuhnlein P, Winter P, Ludolph AC, Kassubek J, Muller U,et al. Novel mutation in the ALS2 gene in juvenile amyotrophic lateralsclerosis. Annals of Neurology. 2005;58(5):800-803.
[266] Daoud H, Valdmanis PN, Gros-Louis F, Belzil V, Spiegelman D, HenrionE, et al. Resequencing of 29 candidate genes in patients with familialand sporadic amyotrophic lateral sclerosis. Archives of neurology. 2011;68(5):587-593.
[267] Figlewicz DA, Krizus A, Martinoli MG, Meininger V, Dib M, Rouleau GA, et al. Variants of the heavy neurolament subunit are associatedwith the development of amyotrophic lateral sclerosis. Hum Mol Genet.1994;3(10):1757-1761.
[268] Al-Chalabi A, Andersen PM, Nilsson P, Chioza B, Andersson JL, Russ C,et al. Deletions of the heavy neurolament subunit tail in amyotrophiclateral sclerosis. Human Molecular Genetics. 1999;8(2):157-164.
[269] Tomkins J, Usher P, Slade JY, Ince PG, Curtis A, Bushby K, et al.Novel insertion in the KSP region of the neurolament heavy gene inamyotrophic lateral sclerosis (ALS). Neuroreport. 1998;9(17):3967-3970
[270] Hirano M, Quinzii CM, Mitsumoto H, Hays AP, Kirk J, Richard P, et al.Senataxin mutations and amyotrophic lateral sclerosis. Amyotrophic LateralSclerosis. 2011;12(3):233-237.
[271] Chen YZ, Bennett CL, Huynh HM, Blair IP, Puls I, Irobi J, et al. DNA/RNA helicase gene mutations in a form of juvenile amyotrophiclateral sclerosis (ALS4). Am J Hum Genet. 2004;(6):1128-1135.
[272] Saracchi E, Castelli M, Bassi MT, Brighina E, Marzorati L, PatassiniM, et al. A novel heterozygous SETX mutation in a patient presentingwith chorea and motor neuron disease SHORT REPORT A novel heterozygousSETX mutation in a patient presenting with chorea and motorneuron disease. Amyotrophic lateral sclerosis & frontotemporal degeneration.2014;15(1-2):138-140.
[273] Arning L, Epplen JT, Rahikkala E, Hendrich C, Ludolph AC, SperfeldAd. The SETX missense variation spectrum as evaluated in patients withALS4-like motor neuron diseases. Neurogenetics. 2013;14(1):53-61.
[274] Zhang H, Liang JL, Chen SY, Wang ZJ, Yang F, Cui F, et al. Screeningof the SETX gene in sporadic amyotrophic lateral sclerosis patients of Chinese origin. Zhonghua yi xue za zhi. 2018;98(33):2628-2631.
[275] Zhao Zh, Chen Wz, Wu Zy, Wang N, Zhao Gx, Murong Sx. A novelmutation in the senataxin gene identied in a Chinese patient withsporadic amyotrophic lateral sclerosis. Amyotrophic Lateral Sclerosis.2009;10(2):118-122.
[276] Avemaria F, Lunetta C, Tarlarini C, Mosca L, Maestri E, Marocchi A,et al. Mutation in the senataxin gene found in a patient aected by familialALS with juvenile onset and slow progression Mutation in the senataxingene found in a patient aected by familial ALS with juvenile onset andslow progression. Amyotrophic Lateral Sclerosis. 2011;12(3):228-230.
[277] Rudnik-Schoneborn S, Arning L, Epplen T, Zerres K. SETX gene mutationin a family diagnosed autosomal dominant proximal spinal muscularatrophy. Neuromuscular Disorders. 2012;22(3):258-262.
[278] Tripolszki K, Torok D, Goudenege D, Farkas K, Sulak A, Torok N, et al.High-throughput sequencing revealed a novel SETX mutation in a Hungarianpatient with amyotrophic lateral sclerosis. Brain and behavior.2017;7(4):e00669.
[279] Taniguchi T, Hokezu Y, Okada T, Ishibashi M, Hashiguchi A, MatsuuraE, et al. A amyotrophic lateral sclerosis (ALS) 4 family misdiagnosed ashereditary spastic paraplegia-a case report. Rinsho shinkeigaku = Clinicalneurology. 2017;57(11):685-690.
[280] Akimoto C, Morita M, Atsuta N, Sobue G, Nakano I. High-ResolutionMelting (HRM) Analysis of the Cu/Zn Superoxide Dismutase (SOD1)Gene in Japanese Sporadic Amyotrophic Lateral Sclerosis (SALS) Patients.Neurology Research International. 2011;2011:1-8.
[281] Kuzma-Kozakiewicz M, Berdynski M, Morita M, Takahashi Y, Kawata A,Kaida KI, et al. Recurrent K3E mutation in Cu/Zn superoxide dismutasegene associated with amyotrophic lateral sclerosis. Amyotrophic LateralSclerosis and Frontotemporal Degeneration. 2013;14(7-8):608-614.
[282] Baek W, Koh SH, Park JS, Kim YS, Kim HY, Kwon MJ, et al. A novelcodon4 mutation (A4F) in the SOD1gene in familial amyotrophic lateralsclerosis. Journal of the Neurological Sciences. 2011;306(1-2):157-159.
[283] Nakano R, Sato S, Inuzuka T, Sakimura K, Mishina M, Takahashi H, et al.A Novel Mutation in Cu/Zn Superoxide Dismutase Gene in Japanese FamilialAmyotrophic Lateral Sclerosis; 1994.
[284] Deng HX, Tainer JA, Mitsumoto H, Ohnishi A, He X, Hung WY, et al.Two novel sod1 mutations in patients with familial amyotrophic lateralsclerosis. Human Molecular Genetics. 1995;4(6):1113-1116.
[285] Andersen PM, Sims KB, Xin WW, Kiely R, O'Neill G, Ravits J, et al.Sixteen novel mutations in the Cu/Zn superoxide dismutase gene in amyotrophiclateral sclerosis: a decade of discoveries, defects and disputes.Amyotrophic lateral sclerosis and other motor neuron disorders : ocialpublication of the World Federation of Neurology, Research Group onMotor Neuron Diseases. 2003;4(2):62-73.
[286] Nakanishi T, Kishikawa M, Miyazaki A, Shimizu A, Ogawa Y, SakodaS, et al. Simple and dened method to detect the SOD-1 mutants frompatients with familial amyotrophic lateral sclerosis by mass spectrometry.Journal of Neuroscience Methods. 1998;81(1-2):41-44.
[287] Deng HX, Hentati A, Tainer JA, Iqbal Z, Cayabyab A, Hung WY, et al.Amyotrophic lateral sclerosis and structural defects in Cu,Zn superoxidedismutase. Science. 1993;261(5124):1047-1051.
[288] Rosen DR, Bowling AC, Patterson D, Usdin TB, Sapp P, Mezey E, et al.A frequent ala 4 to val superoxide dismutase-1 mutation is associatedwith a rapidly progressive familial amyotrophic lateral sclerosis. Humanmolecular genetics. 1994;3(6):981-987.
[289] Pramatarova A, Figlewicz DA, Krizus A, Han FY, Nicole A, Dib M, et al.identification of New Mutations in the Cu / Zn Superoxide DismutaseGene of Patients with Familial Amyotrophic Lateral Sclerosis. Am J HumGenet. 1995;56(3):592-596.
[290] Andersen PM, Nilsson P, Kera M, Forsgren L, Ha J, KarlsborgM. Phenotypic heterogeneity in motor neuron disease patientswith CuZn-superoxide dismutase mutations in Scandinavia. Brain.1997;120(10):1723-1737.
[291] Gellera C, Castellotti B, Riggio MC, Silani V, Morandi L, Testa D, et al.Superoxide dismutase gene mutations in Italian patients with familial andsporadic amyotrophic lateral sclerosis : identi R cation of three novelmissense mutations. Neuromuscular Disorders. 2001;11(4):404-410.
[292] Gellera C. Genetics of ALS in Italian families. Amyotrophic lateral sclerosisand other motor neuron disorders. 2001;2 Suppl 1:S43-6.
[293] Stewart HG, Andersen PM, Eisen A, Weber M. Corticomotoneuronal dysfunctionin ALS patients with dierent SOD1 mutations. Clinical Neurophysiology.2006;117(8):1850-1861.
[294] Eisen A, Mezei MM, Stewart HG, Fabros M, Gibson G, Andersen PM,et al. SOD1 gene mutations in ALS patients from British Columbia,Canada: clinical features, neurophysiology and ethical issues in management.Amyotrophic lateral sclerosis : ocial publication of the WorldFederation of Neurology Research Group on Motor Neuron Diseases. 2008;9(2):108-119.
[295] Salameh JS, Atassi N, David WS. SOD1 (A4V)-mediated ALS presentingwith lower motor neuron facial diplegia and unilateral vocal cord paralysis.Muscle Nerve. 2009;40(5):880-882.
[296] Tang L, Ma Y, Liu X, Chen L, Fan D. identification of an A4V SOD1mutation in a Chinese patient with amyotrophic lateral sclerosis withoutthe A4V founder eect common in North America. Amyotrophic lateralsclerosis & frontotemporal degeneration. 2018;19(5-6):466-468.
[297] Weber M, Neuwirth C, Thierbach J, Schweikert K, Czaplinski A, PetersenJ, et al. ALS patients with SOD1 mutations in Switzerland show verydiverse phenotypes and extremely long survival.; 2012.
[298] Kohno S, Takahashi Y, Miyajima H, Serizawa M, Mizoguchi K. A novelmutation (Cys6Gly) in the Cu/Zn superoxide dismutase gene associatedwith rapidly progressive familial amyotrophic lateral sclerosis. Neuroscienceletters. 1999;276(2):135-137.
[299] Brotherton T, Polak M, Kelly C, Birve A, Andersen P, Marklund SL,et al. A novel ALS SOD1 C6S mutation with implications for aggregationrelated toxicity and genetic counseling. Amyotrophic lateral sclerosis. 2011;12(3):215-219.
[300] Morita M, Aoki M, Abe K, Hasegawa T, Sakuma R, Onodera Y, et al.A novel two-base mutation in the Cu/Zn superoxide dismutase gene associatedwith familial amyotrophic lateral sclerosis in Japan. Neuroscienceletters. 1996;205(2):79-82.
[301] Zhao G, Yin X, Wu D, Mao S, Yin H, Zhang B. Clinical features andCu/Zn superoxide dismutase gene mutations in two mainland Chinesefamilies with amyotrophic lateral sclerosis. The International journal ofneuroscience. 2011;121(4):191-195.
[302] Wang Z, Cai W, Cui F, Cai T, Chen Z, Mao F, et al. identification of anovel missense (C7W) mutation of SOD1 in a large familial amyotrophiclateral sclerosis pedigree. Neurobiology of aging. 2014;35(3):725.e11-5
[303] Hirano M, Fujii J, Nagai Y, Sonobe M, Okamoto K, Araki H, et al. A newvariant Cu/Zn superoxide dismutase (Val7->Glu) deduced from lymphocytemRNA sequences from Japanese patients with familial amyotrophiclateral sclerosis. Biochemical and biophysical research communications.1994;204(2):572-577.
[304] Nishiyama A, Warita H, Takahashi T, Suzuki N, Nishiyama S, Tano O,et al. Prominent sensory involvement in a case of familial amyotrophiclateral sclerosis carrying the L8V SOD1 mutation. Clinical neurology andneurosurgery. 2016;150:194-196.
[305] Bereznai B, Winkler A, Borasio GD, Gasser T. A novel SOD1 mutationin an Austrian family with amyotrophic lateral sclerosis. Neuromusculardisorders : NMD. 1997;7(2):113-116.
[306] Ricci C, Benigni M, Battistini S, Greco G, Torzini A, Giannini F. A novelexon 1 mutation (G10R) in the SOD1 gene in a patient with familialALS. Amyotrophic lateral sclerosis : ocial publication of the WorldFederation of Neurology Research Group on Motor Neuron Diseases. 2010;11(5):481-485.
[307] Kim NH, Kim HJ, Kim M, Lee KW. A novel SOD1 gene mutation in a Koreanfamily with amyotrophic lateral sclerosis. Journal of the neurologicalsciences. 2003;206(1):65-69.
[308] Kim W, Kim JS, Lee KS, Gwoun YJ, Kim JM, Lee KH. Anticipation andphenotypic heterogeneity in korean familial amyotrophic lateral sclerosiswith superoxide dismutase 1 gene mutation. Journal of clinical neurology(Seoul, Korea). 2007;3(1):38-44.
[309] Georgoulopoulou E, Gellera C, Bragato C, Sola P, Chiari A, Bernabei C,et al. A novel SOD1 mutation in a young amyotrophic lateral sclerosispatient with a very slowly progressive clinical course. Muscle & nerve.2010;42(4):596-597.
[310] Del Grande A, Conte A, Lattante S, Luigetti M, Marangi G, ZollinoM, et al. D11Y SOD1 mutation and benign ALS: a consistentgenotype-phenotype correlation. Journal of the neurological sciences. 2011;309(1-2):31-33.
[311] Penco S, Schenone A, Bordo D, Bolognesi M, Abbruzzese M, Bugiani O,et al. A SOD1 gene mutation in a patient with slowly progressing familialALS. Neurology. 1999;53(2):404-406.
[312] Skvortsova VI, Limborskaia SA, Slominskii PA, Levitskii GN, LevitskaiaNI, Shadrina MI, et al. Peculiarities of sporadic motor neuron disease associatedwith D90A and G12R mutations in Russian population. Zhurnalnevrologii i psikhiatrii imeni SS Korsakova. 2003;103(11):46-52.
[313] Battistini S, Giannini F, Greco G, Bibbo G, Ferrera L, Marini V, et al.SOD1 mutations in amyotrophic lateral sclerosis. Results from a multicenterItalian study. Journal of neurology. 2005;252(7):782-788.
[314] Kim MJ, Bae JH, Kim JM, Kim HR, Yoon BN, Sung JJ, et al. RapidProgression of Sporadic ALS in a Patient Carrying SOD1 p.Gly13ArgMutation.; 2016.
[315] Liu X, Chen J, Li X, Gao S, Deng M. Generation of induced pluripotentstem cells from amyotrophic lateral sclerosis patientcarrying SOD1-V14Mmutation. Zhonghua yi xue za zhi. 2014;94(27):2143-2147.
[316] Vrabec K, Koritnik B, Leonardis L, Dolenc-Groselj L, Zidar J, Smith B,et al. Genetic analysis of amyotrophic lateral sclerosis in the Slovenianpopulation. Neurobiology of aging. 2015;36(3):1601.e17-20.
[317] Tripolszki K, Csanyi B, Nagy D, Ratti A, Tiloca C, Silani V, et al. Geneticanalysis of the SOD1 and C9ORF72 genes in Hungarian patients withamyotrophic lateral sclerosis. Neurobiology of aging. 2017;53:195.e1-195.e5.
[318] Kawamata J, Shimohama S, Takano S, Harada K, Ueda K, Kimura J.Novel G16S (GGC-AGC) mutation in the SOD-1 gene in a patient withapparently sporadic young-onset amyotrophic lateral sclerosis. Humanmutation. 1997;9(4):356-358.
[319] Gromicho M, Pinto S, Gisca E, Pronto-Laborinho AC, Andersen PM,de Carvalho M. Frequency of C9orf72 hexanucleotide repeat expansionand SOD1 mutations in Portuguese patients with amyotrophic lateral sclerosis. Neurobiology of Aging. 2018;70:325.e7-325.e15.
[320] Diard-Detoeuf C, Dangoumau A, Limousin N, Biberon J, Vourc'h P, AndresCR, et al. Association of a paraneoplastic motor neuron disease withanti-Ri antibodies and a novel SOD1 I18del mutation. Journal of theneurological sciences. 2014;337(1-2):212-214.
[321] Mayeux V, Corcia P, Besson G, Jafari-Schluep HF, Briolotti V, Camu W.N19S, a new SOD1 mutation in sporadic amyotrophic lateral sclerosis: noevidence for disease causation. Annals of neurology. 2003;53(6):815-818
[322] Chio A, Traynor BJ, Lombardo F, Fimognari M, Calvo A, Ghiglione P,et al. Prevalence of SOD1 mutations in the Italian ALS population. Neurology.2008;70(7):533-537.
[323] Kim HY, Ki CS, Koh SH, Park KH, Sunwoo IN, Kim SH. Clinical characteristicsof familial amyotrophic lateral sclerosis with a Phe20Cys mutationin the SOD1 gene in a Korean family. Amyotrophic lateral sclerosis. 2007;8(2):73-78.
[324] Liu ZJ, Li HF, Tan GH, Tao QQ, Ni W, Cheng XW, et al. Identify mutationin amyotrophic lateral sclerosis cases using HaloPlex target enrichmentsystem. Neurobiology of aging. 2014;35(12):2881.e11-2881.e15.
[325] Jones CT, Swingler RJ, Brock DJ. identification of a novel SOD1 mutationin an apparently sporadic amyotrophic lateral sclerosis patient and thedetection of Ile113Thr in three others. Human molecular genetics. 1994;3(4):649-650.
[326] Jones CT, Swingler RJ, Simpson SA, Brock DJ. Superoxide dismutasemutations in an unselected cohort of Scottish amyotrophic lateral sclerosispatients. Journal of medical genetics. 1995;32(4):290-292.
[327] Boukaftane Y, Khoris J, Moulard B, Salachas F, Meininger V, MalafosseA, et al. identification of six novel SOD1 gene mutations in familial amyotrophiclateral sclerosis. The Canadian journal of neurological sciencesLe journal canadien des sciences neurologiques. 1998;25(3):192-196.
[328] Syriani E, Morales M, Gamez J. The p.E22G mutation in the Cu/Znsuperoxide-dismutase gene predicts a long survival time: clinical and geneticcharacterization of a seven-generation ALS1 Spanish pedigree. Journalof the neurological sciences. 2009;285(1-2):46-53.
[329] Rabe M, Felbecker A, Waibel S, Steinbach P, Winter P, Muller U, et al.The epidemiology of CuZn-SOD mutations in Germany: a study of 217families. Journal of neurology. 2010;257(8):1298-1302.
[330] Corti S, Donadoni C, Ronchi D, Bordoni A, Fortunato F, Santoro D,et al. Amyotrophic lateral sclerosis linked to a novel SOD1 mutation withmuscle mitochondrial dysfunction. Journal of the neurological sciences.2009;276(1-2):170-174.
[331] Zinman L, Liu HN, Sato C, Wakutani Y, Marvelle AF, Moreno D, et al.A mechanism for low penetrance in an ALS family with a novel SOD1deletion. Neurology. 2009;72(13):1153-1159.
[332] Shi Sg, Li Ls, Chen Kn, Liu X. identification of the mutation of SOD1gene in a familial amyotrophic lateral sclerosis. Zhonghua yi xue yi chuanxue za zhi = Zhonghua yixue yichuanxue zazhi = Chinese journal of medicalgenetics. 2004;21(2):149-152.
[333] Hu J, Chen K, Ni B, Li L, Chen G, Shi S. A novel SOD1 mutation in amyotrophiclateral sclerosis with a distinct clinical phenotype. Amyotrophiclateral sclerosis : ocial publication of the World Federation of NeurologyResearch Group on Motor Neuron Diseases. 2012;13(1):149-154.
[334] Dangoumau A, Verschueren A, Hammouche E, Papon MA, Blasco H,Cherpi-Antar C, et al. Novel SOD1 mutation p.V31A identied with aslowly progressive form of amyotrophic lateral sclerosis. Neurobiology ofaging. 2014;35(1):266.e1-4.
[335] Sakamoto H, Akamatsu M, Hirano M, Saigoh K, Ueno S, Isono C, et al.Multiple system involvement in a Japanese patient with a V31A mutationin the SOD1 gene. Amyotrophic lateral sclerosis & frontotemporaldegeneration. 2014;15(3-4):312-314.
[336] Rosen DR. Mutations in Cu/Zn superoxide dismutase gene are associatedwith familial amyotrophic lateral sclerosis. Nature. 1993;364(6435):362.
[337] Cudkowicz ME, McKenna-Yasek D, Sapp PE, Chin W, Geller B, HaydenDL, et al. Epidemiology of mutations in superoxide dismutase inamyotrophic lateral sclerosis. Ann Neurol.;(2):210-221.
[338] Garcia-Redondo A, Bustos F, Juan Y Seva B, Del Hoyo P, Jimenez S,Campos Y, et al. Molecular analysis of the superoxide dismutase 1 genein Spanish patients with sporadic or familial amyotrophic lateral sclerosis.Muscle & nerve. 2002;26(2):274-278.
[339] Gamez J, Corbera-Bellalta M, Nogales G, Raguer N, Garcia-Arumi E,Badia-Canto M, et al. Mutational analysis of the Cu/Zn superoxide dismutasegene in a Catalan ALS population: should all sporadic ALS casesalso be screened for SOD1? J Neurol Sci. 2006;247(1):21-28.
[340] Kobayashi J, Kuroda M, Kawata A, Mochizuki Y, Mizutani T, KomoriT, et al. Novel G37V mutation of SOD1 gene in autopsied patient withfamilial amyotrophic lateral sclerosis. Amyotrophic lateral sclerosis. 2012;13(6):570-572.
[341] Aguirre T, Matthijs G, Robberecht W, Tilkin P, Cassiman JJ. Mutationalanalysis of the Cu/Zn superoxide dismutase gene in 23 familial and69 sporadic cases of amyotrophic lateral sclerosis in Belgium. Europeanjournal of human genetics : EJHG. 1999;7(5):599-602.
[342] Wei Q, Zhou Q, Chen Y, Ou R, Cao B, Xu Y, et al. Analysis of SOD1 mutationsin a Chinese population with amyotrophic lateral sclerosis: a casecontrolstudy and literature review. Scientic reports. 2017;7:44606.
[343] Rainero I, Pinessi L, Tsuda T, Vignocchi MG, Vaula G, Calvi L, et al.SOD1 missense mutation in an Italian family with ALS. Neurology. 1994;44(2):347-349.
[344] Battistini S, Ricci C, Giannini F, Calzavara S, Greco G, Del Corona A,et al. G41S SOD1 mutation: A common ancestor for six ALS Italianfamilies with an aggressive phenotype. Amyotrophic lateral sclerosis :ocial publication of the World Federation of Neurology Research Groupon Motor Neuron Diseases. 2010;11(1-2):210-215.
[345] Berdynski M, Kuzma-Kozakiewicz M, Ricci C, Kubiszewska J, MillecampsS, Salachas F, et al. Recurrent G41S mutation in Cu/Zn superoxide dismutasegene (SOD1) causing familial amyotrophic lateral sclerosis in alarge Polish family. Amyotrophic lateral sclerosis : ocial publicationof the World Federation of Neurology Research Group on Motor NeuronDiseases. 2012;13(1):132-136.
[346] Oh SI, Hong JH, Choi BW, Oh KW, Park CK, Kwon MJ, et al. A NovelF45S SOD1 Mutation in Amyotrophic Lateral Sclerosis Coexisting withBullous Pemphigoid. Journal of clinical neurology (Seoul, Korea). 2015;11(4):390-394.
[347] Aoki M, Ogasawara M, Matsubara Y, Narisawa K, Nakamura S, ItoyamaY, et al. Mild ALS in Japan associated with novel SOD mutation.; 1993.
[348] Abe K, Aoki M, Ikeda M, Watanabe M, Hirai S, Itoyama Y. Clinicalcharacteristics of familial amyotrophic lateral sclerosis with Cu/Zn superoxidedismutase gene mutations. Journal of the neurological sciences. 1996;136(1-2):108-116.
[349] Niemann S, Joos H, Meyer T, Vielhaber S, Reuner U, Gleichmann M,et al. Familial ALS in Germany: origin of the R115G SOD1 mutation bya founder eect. Journal of neurology, neurosurgery, and psychiatry. 2004;75(8):1186-1188.
[350] Zou ZY, Liu MS, Li XG, Cui LY. H46R SOD1 mutation is consistentlyassociated with a relatively benign form of amyotrophic lateral sclerosiswith slow progression. Amyotrophic lateral sclerosis & frontotemporaldegeneration. 2016;17(7-8):610-613.
[351] Alavi A, Khani M, Nassi S, Shamshiri H, Elahi E. An Iranian familialamyotrophic lateral sclerosis pedigree with p.Val48Phe causing mutationin SOD1: a genetic and clinical report. Iranian journal of basic medicalsciences. 2014;17(10):735-739.
[352] Enayat ZE, Orrell RW, Claus A, Ludolph A, Bachus R, Brockmuller J,et al. Two novel mutations in the gene for copper zinc superoxide dismutasein UK families with amyotrophic lateral sclerosis. Human moleculargenetics. 1995;4(7):1239-1240.
[353] Orrell RW, Habgood JJ, Gardiner I, King AW, Bowe FA, Hallewell RA,et al. Clinical and functional investigation of 10 missense mutations and anovel frameshift insertion mutation of the gene for copper-zinc superoxidedismutase in UK families with amyotrophic lateral sclerosis. Neurology.1997;48(3):746-751.
[354] Orrell RW, Habgood JJ, Malaspina A, Mitchell J, Greenwood J, Lane RJ,et al. Clinical characteristics of SOD1 gene mutations in UK families withALS. Journal of the neurological sciences. 1999;169(1-2):56-60.
[355] Conforti FL, Barone R, Fermo SL, Giliberto C, Patti F, Gambardella A,et al. Sporadic motor neuron disease in a familial novel SOD1 mutation:incomplete penetrance or chance association? Amyotrophic lateral sclerosis: ocial publication of the World Federation of Neurology ResearchGroup on Motor Neuron Diseases. 2011;12(3):220-222.
[356] Klein CJ, Wu Y, Duan X, Middha S, Dawson BD, Kocher JP, et al. NovelSOD1 mutation discovered in atypical ALS by whole exome sequencing.;2013
[357] Corrado L, D'Alfonso S, Bergamaschi L, Testa L, Leone M, Nasuelli N,et al. SOD1 gene mutations in Italian patients with Sporadic AmyotrophicLateral Sclerosis (ALS). Neuromuscular disorders : NMD. 2006;16(11):800-804.
[358] Baek W, Koh SH, Kim YS, Kim HY, Kwon MJ, Ki CS, et al. A novel exon3 mutation (P66S) in the SOD1 gene in familial ALS. The Canadian journalof neurological sciences Le journal canadien des sciences neurologiques.2012;39(2):245-246.
[359] Keckarevic D, Stevic Z, Keckarevic-Markovic M, Kecmanovic M, RomacS. A novel P66S mutation in exon 3 of the SOD1 gene with early onsetand rapid progression. Amyotrophic lateral sclerosis : ocial publicationof the World Federation of Neurology Research Group on Motor NeuronDiseases. 2012;13(2):237-240.
[360] del Grande A, Luigetti M, Conte A, Mancuso I, Lattante S, MarangiG, et al. A novel L67P SOD1 mutation in an Italian ALS patient.Amyotrophic lateral sclerosis : ocial publication of the World Federationof Neurology Research Group on Motor Neuron Diseases. 2011;12(2):150-152.
[361] Orrell RW, Marklund SL, DeBelleroche JS. Familial ALS is associatedwith mutations in all exons of SOD1: a novel mutation in exon 3(Gly72Ser). Journal of the neurological sciences. 1997;153(1):46-49.
[362] Shaw CE, Enayat ZE, Chioza BA, Al-Chalabi A, Radunovic A, PowellJF, et al. Mutations in all five exons of SOD-1 may cause ALS. Annals of neurology. 1998;43(3):390-394.
[363] Kobayashi Z, Tsuchiya K, Kubodera T, Shibata N, Arai T, Miura H,et al. FALS with Gly72Ser mutation in SOD1 gene: report of a familyincluding the rst autopsy case. Journal of the neurological sciences. 2011;300(1-2):9-13.
[364] Stewart HG, Mackenzie IR, Eisen A, Brannstrom T, Marklund SL, AndersenPM. Clinicopathological phenotype of ALS with a novel G72C SOD1 gene mutation mimicking a myopathy. Muscle & nerve. 2006;33(5):701-706.
[365] Segovia-Silvestre T, Andreu AL, Vives-Bauza C, Garcia-Arumi E, CerveraC, Gamez J. A novel exon 3 mutation (D76V) in the SOD1 gene associatedwith slowly progressive ALS. Amyotrophic lateral sclerosis and othermotor neuron disorders. 2002;3(2):69-74.
[366] Birve A, Neuwirth C, Weber M, Marklund SL, Nilsson AC, JonssonPA, et al. A novel SOD1 splice site mutation associated with familialALS revealed by SOD activity analysis. Human molecular genetics. 2010;19(21):4201-4206.
[367] Alexander MD, Traynor BJ, Miller N, Corr B, Frost E, McQuaid S, et al."True" sporadic ALS associated with a novel SOD-1 mutation. Annals ofneurology. 2002;52(5):680-683.
[368] Aoki M, Abe K, Houi K, Ogasawara M, Matsubara Y, Kobayashi T, et al.Variance of age at onset in a Japanese family with amyotrophic lateralsclerosis associated with a novel Cu/Zn superoxide dismutase mutation.Annals of neurology. 1995;37(5):676-679.
[369] Curti D, Rognoni F, Alimonti D, Malaspina A, Feletti F, Tessera S, et al.SOD1 activity and protective factors in familial ALS patients with L84FSOD1 mutation. Amyotrophic lateral sclerosis and other motor neurondisorders : ocial publication of the World Federation of Neurology, ResearchGroup on Motor Neuron Diseases. 2002;3(3):115-122.
[370] Alavi A, Nassi S, Rohani M, Zamani B, Sedighi B, Shamshiri H, et al.Genetic analysis and SOD1 mutation screening in Iranian amyotrophiclateral sclerosis patients. Neurobiology of aging. 2013;34(5):1516.e1-8
[371] Vats A, Gourie-Devi M, Verma M, Ramachandran S, Taneja B, KukretiR, et al. identification of L84F mutation with a novel nucleotide changec.255G > T in the superoxide dismutase gene in a North Indian familywith amyotrophic lateral sclerosis. Amyotrophic lateral sclerosis & frontotemporaldegeneration. 2016;17(3-4):253-259.
[372] Takazawa T, Ikeda K, Hirayama T, Kawabe K, Nakamura Y, Ito H, et al.Familial amyotrophic lateral sclerosis with a novel G85S mutation of superoxidedismutase 1 gene: clinical features of lower motor neuron disease.Internal medicine (Tokyo, Japan). 2010;49(2):183-186.
[373] Maeda T, Kurahashi K, Matsunaga M, Inoue K, Inoue M. On intrafamilialclinical diversities of a familial amyotrophic lateral sclerosis witha point mutation of Cu/Zn superoxide dismutase (Asn 86-Ser]. No toshinkei = Brain and nerve. 1997;49(9):847-851.
[374] Hayward C, Brock DJ, Minns RA, Swingler RJ. Homozygosity forAsn86Ser mutation in the CuZn-superoxide dismutase gene produces asevere clinical phenotype in a juvenile onset case of familial amyotrophiclateral sclerosis.; 1998.
[375] Khani M, Alavi A, Nassi S, Elahi E. Observation of c.260A > G mutationin superoxide dismutase 1 that causes p.Asn86Ser in Iranian amyotrophiclateral sclerosis patient and absence of genotype/phenotype correlation.Iranian journal of neurology. 2015;14(3):152-157.
[376] Beck M, Sendtner M, Toyka KV. Novel SOD1 N86K mutation is associatedwith a severe phenotype in familial ALS. Muscle & nerve. 2007;36(1):111-114.
[377] Jacobsson J, Jonsson PA, Andersen PM, Forsgren L, Marklund SL. Superoxidedismutase in CSF from amyotrophic lateral sclerosis patients withand without CuZn-superoxide dismutase mutations. Brain : a journal ofneurology. 2001;124(Pt 7):1461-1466.
[378] Rezania K, Yan J, Dellefave L, Deng HX, Siddique N, Pascuzzi RT, et al. Arare Cu/Zn superoxide dismutase mutation causing familial amyotrophiclateral sclerosis with variable age of onset, incomplete penetrance and asensory neuropathy. Amyotrophic lateral sclerosis and other motor neurondisorders : ocial publication of the World Federation of Neurology,Research Group on Motor Neuron Diseases…
[379] Wuolikainen A, Andersen PM, Moritz T, Marklund SL, Antti H. ALSpatients with mutations in the SOD1 gene have an unique metabolomicprole in the cerebrospinal uid compared with ALS patients withoutmutations. Molecular genetics and metabolism. 2012;105(3):472-478.
[380] Calvo A, Ilardi A, Moglia C, Canosa A, Carrara G, Valentini C, et al.An ALS case with a novel D90N-SOD1 heterozygous missense mutation.Amyotrophic lateral sclerosis : ocial publication of the WorldFederation of Neurology Research Group on Motor Neuron Diseases. 2012;13(4):393-395.
[381] Li Y, Sun B, Chen S, Ren Y, Cui F, Yang F, et al. A novel D90 K91insNmutation in exon 4 of the SOD1 gene caused familial amyotrophic lateralsclerosis in a Chinese pedigree. Amyotrophic lateral sclerosis & frontotemporaldegeneration. 2018;p. 1-6.
[382] Andersen PM, Nilsson P, Ala-Hurula V, Keranen ML, Tarvainen I, HaltiaT, et al. Amyotrophic lateral sclerosis associated with homozygosity foran Asp90Ala mutation in CuZn-superoxide dismutase. Nat Genet. 1995;10(1):61-66.
[383] Sjalander A, Beckman G, Deng HX, Iqbal Z, Tainer JA, Siddique T. TheD90A mutation results in a polymorphism of Cu,Zn superoxide dismutasethat is prevalent in northern Sweden and Finland. Human moleculargenetics. 1995;4(6):1105-1108.
[384] Andersen PM, Forsgren L, Binzer M, Nilsson P, Ala-Hurula V, KeranenML, et al. Autosomal recessive adult-onset amyotrophic lateral sclerosisassociated with homozygosity for Asp90Ala CuZn-superoxide dismutasemutation. A clinical and genealogical study of 36 patients. Brain. 1996;119 ( Pt 4:1153-1172.
[385] Robberecht W, Aguirre T, Van den Bosch L, Tilkin P, Cassiman JJ,Matthijs G. D90A heterozygosity in the SOD1 gene is associated withfamilial and apparently sporadic amyotrophic lateral sclerosis. Neurology.1996;47(5):1336-1339.
[386] Jackson M, Al-Chalabi A, Enayat ZE, Chioza B, Leigh PN, MorrisonKE. Copper/zinc superoxide dismutase 1 and sporadic amyotrophic lateralsclerosis: analysis of 155 cases and identification of a novel insertionmutation. Annals of neurology. 1997;42(5):803-807.
[387] Mancuso M, Filosto M, Naini A, Rocchi A, Del Corona A, Sartucci F, et al.A screening for superoxide dismutase-1 D90A mutation in Italian patientswith sporadic amyotrophic lateral sclerosis. Amyotrophic lateral sclerosisand other motor neuron disorders : ocial publication of the World Federationof Neurology, Research Group on Motor Neuron Diseases. 2002;3(4):215-218.
[388] Jonsson PA, Gramo KS, Andersen PM, Marklund SL, Brannstrom T. Superoxidedismutase in amyotrophic lateral sclerosis patients homozygousfor the D90A mutation. Neurobiology of disease. 2009;36(3):421-424.
[389] Luigetti M, Conte A, Madia F, Marangi G, Zollino M, Mancuso I, et al.Heterozygous SOD1 D90A mutation presenting as slowly progressive predominantupper motor neuron amyotrophic lateral sclerosis. Neurologicalsciences : ocial journal of the Italian Neurological Society and of theItalian Society of Clinical Neurophysiology. 2009;30(6):517-520.
[390] Luisa Conforti F, Sprovieri T, Mazzei R, Patitucci A, Ungaro C, ZoccolellaS, et al. Further evidence that D90A-SOD1 mutation is recessivelyinherited in ALS patients in Italy. Amyotrophic lateral sclerosis : o-cial publication of the World Federation of Neurology Research Group onMotor Neuron Diseases. 2009;10(1):58-60.
[391] Origone P, Caponnetto C, Mascolo M, Mandich P. Heterozygous D90ASOD1mutation in an Italian ALS patient with atypical presentation.;2009
[392] Giannini F, Battistini S, Mancuso M, Greco G, Ricci C, Volpi N, et al.D90A-SOD1 mutation in ALS: The rst report of heterozygous Italianpatients and unusual ndings. Amyotrophic lateral sclerosis : ocial publicationof the World Federation of Neurology Research Group on MotorNeuron Diseases. 2010;11(1-2):216-219.
[393] Morita M, Abe K, Takahashi M, Onodera Y, Okumura H, Niino M, et al.A novel mutation Asp90Val in the SOD1 gene associated with Japanesefamilial ALS. European Journal of Neurology. 1998;5:389-392.
[394] Elshafey A, Lanyon WG, Connor JM. identification of a new missensepoint mutation in exon 4 of the Cu/Zn superoxide dismutase (SOD-1)gene in a family with amyotrophic lateral sclerosis. Human moleculargenetics. 1994;3(2):363-364.
[395] Orrell R, de Belleroche J, Marklund S, Bowe F, Hallewell R. A novel SODmutant and ALS.; 1995.
[396] Kawata A, Kato S, Hayashi H, Hirai S. Prominent sensory and autonomicdisturbances in familial amyotrophic lateral sclerosis with a Gly93Sermutation in the SOD1 gene. Journal of the neurological sciences. 1997;153(1):82-85.
[397] Hosler BA, Nicholson GA, Sapp PC, Chin W, Orrell RW, de BellerocheJS, et al. Three novel mutations and two variants in the gene for Cu/Znsuperoxide dismutase in familial amyotrophic lateral sclerosis. Neuromusculardisorders : NMD. 1996;6(5):361-366.
[398] Esteban J, Rosen DR, Bowling AC, Sapp P, McKenna-Yasek D, O'ReganJP, et al. identification of two novel mutations and a new polymorphismin the gene for Cu/Zn superoxide dismutase in patients with amyotrophiclateral sclerosis. Human molecular genetics. 1994;3(6):997-998.
[399] Restagno G, Lombardo F, Sbaiz L, Mari C, Gellera C, Alimonti D, et al.The rare G93D mutation causes a slowly progressing lower motor neurondisease. Amyotrophic lateral sclerosis. 2008;9(1):35-39.
[400] Luigetti M, Madia F, Conte A, Marangi G, Zollino M, Del Grande A,et al. SOD1 G93D mutation presenting as paucisymptomatic amyotrophiclateral sclerosis. Amyotrophic lateral sclerosis : ocial publication ofthe World Federation of Neurology Research Group on Motor NeuronDiseases. 2009;10(5-6):479-482.
[401] Penco S, Lunetta C, Mosca L, Maestri E, Avemaria F, Tarlarini C, et al.Phenotypic heterogeneity in a SOD1 G93D Italian ALS family: an exampleof human model to study a complex disease. Journal of molecularneuroscience : MN. 2011;44(1):25-30.
[402] Traynor BJ, Codd MB, Corr B, Forde C, Frost E, Hardiman O. Incidenceand prevalence of ALS in Ireland, 1995-1997: a population-based study.Neurology. 1999;52(3):504-509.
[403] Hand CK, Mayeux-Portas V, Khoris J, Briolotti V, Clavelou P, Camu W,et al. Compound heterozygous D90A and D96N SOD1 mutations in arecessive amyotrophic lateral sclerosis family. Annals of neurology. 2001;49(2):267-271.
[404] van Es MA, Dahlberg C, Birve A, Veldink JH, van den Berg LH, AndersenPM. Large-scale SOD1 mutation screening provides evidence forgenetic heterogeneity in amyotrophic lateral sclerosis. J Neurol NeurosurgPsychiatr.;(5):562-566.
[405] Siddique T, Deng HX. Genetics of amyotrophic lateral sclerosis. Humanmolecular genetics. 1996;5 Spec No:1465-1470.
[406] Siddique T, Nijhawan D, Hentati A. Molecular genetic basis of familialALS. Neurology. 1996;47(4 Suppl 2):S27-34; discussion S34-5.
[407] Jones CT, Shaw PJ, Chari G, Brock DJ. identification of a novel exon 4 SOD1 mutation in a sporadic amyotrophic lateral sclerosis patient. Molecularand cellular probes. 1994;8(4):329-330.
[408] Calder VL, Domigan NM, George PM, Donaldson IM, Winterbourn CC.Superoxide dismutase (glu100->gly) in a family with inherited motor neurondisease: detection of mutant superoxide dismutase activity and thepresence of heterodimers. Neuroscience letters. 1995;189(3):143-146.
[409] Yulug IG, Katsanis N, de Belleroche J, Collinge J, Fisher EM. An improvedprotocol for the analysis of SOD1 gene mutations, and a new mutationin exon 4. Human molecular genetics. 1995;4(6):1101-1104.
[410] Orrell RW, Habgood J, Rudge P, Lane RJ, de Belleroche JS. Diculties indistinguishing sporadic from familial amyotrophic lateral sclerosis. Annalsof neurology. 1996;39(6):810-812.
[411] Tan CF, Piao YS, Hayashi S, Obata H, Umeda Y, Sato M, et al. Familialamyotrophic lateral sclerosis with bulbar onset and a novel Asp101TyrCu/Zn superoxide dismutase gene mutation. Acta neuropathologica. 2004;108(4):332-336.
[412] Sato T, Yamamoto Y, Nakanishi T, Fukada K, Sugai F, Zhou Z, et al.identification of two novel mutations in the Cu/Zn superoxide dismutasegene with familial amyotrophic lateral sclerosis: mass spectrometric andgenomic analyses. Journal of the neurological sciences. 2004;218(1-2):79-83.
[413] Ince PG, Shaw PJ, Slade JY, Jones C, Hudgson P. Familial amyotrophiclateral sclerosis with a mutation in exon 4 of the Cu/Zn superoxide dismutasegene: pathological and immunocytochemical changes. Acta neuropathologica.1996;92(4):395-403.
[414] Ikeda M, Abe K, Aoki M, Sahara M,Watanabe M, Shoji M, et al. Variableclinical symptoms in familial amyotrophic lateral sclerosis with a novelpoint mutation in the Cu/Zn superoxide dismutase gene. Neurology. 1995;45(11):2038-2042.
[415] Battistini S, Ricci C, Lotti EM, Benigni M, Gagliardi S, Zucco R, et al.Severe familial ALS with a novel exon 4 mutation (L106F) in the SOD1gene. Journal of the neurological sciences. 2010;293(1-2):112-115.
[416] Canosa A, De Marco G, Lomartire A, Rinaudo MT, Di Cunto F, TurcoE, et al. A novel p.Ser108LeufsTer15 SOD1 mutation leading to the formationof a premature stop codon in an apparently sporadic ALS patient:insights into the underlying pathomechanisms. Neurobiology of aging.2018;72:189.e11-189.e17.
[417] Orrell RW, Habgood JJ, Shepherd DI, Donnai D, de Belleroche J. A novelmutation of SOD-1 (Gly 108 Val) in familial amyotrophic lateral sclerosis.European journal of neurology. 1997;4(1):48-51.
[418] Naini A, Mehrazin M, Lu J, Gordon P, Mitsumoto H. identification ofa novel D109Y mutation in Cu/Zn superoxide dismutase (sod1) gene associatedwith amyotrophic lateral sclerosis. Journal of the neurologicalsciences. 2007;254(1-2):17-21.
[419] Niu YF, Xiong HL, Wu JJ, Chen Y, Qiao K, Wu ZY. Screening ofmutations in SOD1 gene and analysis of genotype-phenotype correlationin Chinese patients with amyotrophic lateral sclerosis]. Yi chuan. 2011;33(7):720-724.
[420] Gamez J, Caponnetto C, Ferrera L, Syriani E, Marini V, Morales M, et al.I112M SOD1 mutation causes ALS with rapid progression and reducedpenetrance in four Mediterranean families. Amyotrophic lateral sclerosis :ocial publication of the World Federation of Neurology Research Groupon Motor Neuron Diseases. 2011;12(1):70-75.
[421] Hermann A, Reuner U, Ziethe G, Brauer A, Golnitz U, Rolfs A, et al.Vocal cord paralysis and rapid progressive motor neuron disease by theI113F mutation in SOD1 gene. Amyotrophic lateral sclerosis : ocial publicationof the World Federation of Neurology Research Group on MotorNeuron Diseases. 2011;12(5):382-384.
[422] Suthers G, Laing N, Wilton S, Dorosz S, Waddy H. "Sporadic" motoneurondisease due to familial SOD1 mutation with low penetrance.; 1994.
[423] Orrell RW, King AW, Hilton DA, Campbell MJ, Lane RJ, de BellerocheJS. Familial amyotrophic lateral sclerosis with a point mutation of SOD-1:intrafamilial heterogeneity of disease duration associated with neurobrillarytangles. Journal of neurology, neurosurgery, and psychiatry. 1995;59(3):266-270.
[424] Rouleau GA, Clark AW, Rooke K, Pramatarova A, Krizus A, SuchowerskyO, et al. SOD1 mutation is associated with accumulation of neurolamentsin amyotrophic lateral sclerosis. Annals of neurology. 1996;39(1):128-131
[425] Kikugawa K, Nakano R, Inuzuka T, Kokubo Y, Narita Y, Kuzuhara S,et al. A missense mutation in the SOD1 gene in patients with amyotrophiclateral sclerosis from the Kii Peninsula and its vicinity, Japan. Neurogenetics.1997;1(2):113-115.
[426] Hays AP, Naini A, He CZ, Mitsumoto H, Rowland LP. Sporadic amyotrophiclateral sclerosis and breast cancer: Hyaline conglomerate inclusionslead to identification of SOD1 mutation. Journal of the neurologicalsciences. 2006;242(1-2):67-69.
[427] Lopate G, Baloh RH, Al-Lozi MT, Miller TM, Fernandes Filho JA, NiO, et al. Familial ALS with extreme phenotypic variability due to theI113T SOD1 mutation. Amyotrophic lateral sclerosis : ocial publicationof the World Federation of Neurology Research Group on Motor NeuronDiseases. 2010;11(1-2):232-236.
[428] Nakamura S, Wate R, Kaneko S, Ito H, Oki M, Tsuge A, et al. An autopsycase of sporadic amyotrophic lateral sclerosis associated with the I113TSOD1 mutation. Neuropathology : ocial journal of the Japanese Societyof Neuropathology. 2014;34(1):58-63.
[429] Kostrzewa M, Burck-Lehmann U, Muller U. Autosomal dominant amyotrophiclateral sclerosis: a novel mutation in the Cu/Zn superoxidedismutase-1 gene. Human molecular genetics. 1994;3(12):2261-2262.
[430] Tortelli R, Conforti FL, Cortese R, D'Errico E, Distaso E, Mazzei R, et al.Amyotrophic lateral sclerosis: a new missense mutation in the SOD1 gene. Neurobiology of Aging. 2013;34(6):1709.e3-5.
[431] Shimizu T, Kawata A, Kato S, Hayashi M, Takamoto K, Hayashi H, et al.Autonomic failure in ALS with a novel SOD1 gene mutation. Neurology.2000;54(7):1534-1537.
[432] Valdmanis PN, Belzil VV, Lee J, Dion PA, St-Onge J, Hince P, et al. Amutation that creates a pseudoexon in SOD1 causes familial ALS. Annalsof human genetics. 2009;73(Pt 6):652-657.
[433] Zu JS, Deng HX, Lo TP, Mitsumoto H, Ahmed MS, Hung WY, et al. Exon5 encoded domain is not required for the toxic function of mutant SOD1but essential for the dismutase activity: identification and characterizationof two new SOD1 mutations associated with familial amyotrophic lateralsclerosis. Neurogenetics. 1997;1(1):65-71.
[434] Sapp PC, Rosen DR, Hosler BA, Esteban J, McKenna-Yasek D, O'ReganJP, et al. identification of three novel mutations in the gene for Cu/Zn superoxidedismutase in patients with familial amyotrophic lateral sclerosis.Neuromuscular disorders: NMD. 1995;5(5):353-357.
[435] Canosa A, Calvo A, Moglia C, Barberis M, Brunetti M, Cammarosano S,et al. A novel p.E121G heterozygous missense mutation of SOD1 in anapparently sporadic ALS case with a 14-year course. Amyotrophic lateralsclerosis & frontotemporal degeneration. 2015;16(1-2):127-128.
[436] Pramatarova A, Goto J, Nanba E, Nakashima K, Takahashi K, TakagiA, et al. A two basepair deletion in the SOD 1 gene causes familial amyotrophiclateral sclerosis. Human molecular genetics. 1994;3(11):2061-2062
[437] Nakashima K,Watanabe Y, Kuno N, Nanba E, Takahashi K. Abnormalityof Cu/Zn superoxide dismutase (SOD1) activity in Japanese familial amyotrophiclateral sclerosis with two base pair deletion in the SOD1 gene.Neurology. 1995;45(5):1019-1020.
[438] Kato S, Shimoda M, Watanabe Y, Nakashima K, Takahashi K, OhamaE. Familial amyotrophic lateral sclerosis with a two base pair deletion insuperoxide dismutase 1: gene multisystem degeneration with intracytoplasmichyaline inclusions in astrocytes. Journal of neuropathology andexperimental neurology. 1996;55(10):1089-1101.
[439] Kadekawa J, Fujimura H, Ogawa Y, Hattori N, Kaido M, NishimuraT, et al. A clinicopathological study of a patient with familial amyotrophiclateral sclerosis associated with a two base pair deletion in thecopper/zinc superoxide dismutase (SOD1) gene. Acta neuropathologica.1997;94(6):617-622.
[440] Murakami T, Warita H, Hayashi T, Sato K, Manabe Y, Mizuno S, et al. Anovel SOD1 gene mutation in familial ALS with low penetrance in females.Journal of the neurological sciences. 2001;189(1-2):45-47.
[441] Takehisa Y, Ujike H, Ishizu H, Terada S, Haraguchi T, Tanaka Y, et al.Familial amyotrophic lateral sclerosis with a novel Leu126Ser mutationin the copper/zinc superoxide dismutase gene showing mild clinical featuresand lewy body-like hyaline inclusions. Archives of neurology. 2001;58(5):736-740.
[442] Holmoy T, Wilson JA, von der Lippe C, Andersen PM, Berg-Hansen P.G127R: A novel SOD1 mutation associated with rapidly evolving ALS andsevere pain syndrome. Amyotrophic lateral sclerosis : ocial publicationof the World Federation of Neurology Research Group on Motor NeuronDiseases. 2010;11(5):478-480.
[443] Hansen C, Gredal O, Werdelin L, Andersen PM, Marklund SL, NilssonP, et al. Novel 4-bp insertion in exon 5 of the CuZn-superoxidedismutase (SOD1) gene associated with familial amyotrophic lateralsclerosis. Human Mutation. 1998;11(S1):S327-S328.
[444] Zhou L, Pioro EP. Familial ALS with SOD1 mutation misdiagnosed withpolyradiculopathy and myopathy. Amyotrophic lateral sclerosis : ocialpublication of the World Federation of Neurology Research Group on MotorNeuron Diseases. 2009;10(5-6):476-478.
[445] Watanabe M, Aoki M, Abe K, Shoji M, Iizuka T, Ikeda Y, et al. Anovel missense point mutation (S134N) of the Cu/Zn superoxide dismutasegene in a patient with familial motor neuron disease. Human mutation.1997;9(1):69-71.
[446] Cui F, Cai W, Wang Z, Ren Y, Li M, Sun Z, et al. New mutation inthe SOD1 (copper/zinc superoxide dismutase-1) gene in a Chinese amyotrophiclateral sclerosis (ALS) patient. Amyotrophic lateral sclerosis &frontotemporal degeneration. 2013;14(7-8):635-637.
[447] Visani M, de Biase D, Bartolomei I, Plasmati R, Morandi L, Cenacchi G,et al. A novel T137A SOD1 mutation in an Italian family with two subjectsaected by amyotrophic lateral sclerosis. Amyotrophic lateral sclerosis :ocial publication of the World Federation of Neurology Research Groupon Motor Neuron Diseases. 2011;12(5):385-388.
[448] Nogales-Gadea G, Garcia-Arumi E, Andreu AL, Cervera C, Gamez J. Anovel exon 5 mutation (N139H) in the SOD1 gene in a Spanish family associatedwith incomplete penetrance. Journal of the neurological sciences.2004;219(1-2):1-6.
[449] Naini A, Musumeci O, Hayes L, Pallotti F, Del Bene M, Mitsumoto H.identification of a novel mutation in Cu/Zn superoxide dismutase geneassociated with familial amyotrophic lateral sclerosis. Journal of the neurologicalsciences. 2002;198(1-2):17-19.
[450] Nakamura M, Bieniek KF, Lin WL, Gra-Radford NR, Murray ME,Castanedes-Casey M, et al. A truncating SOD1 mutation, p.Gly141X, isassociated with clinical and pathologic heterogeneity, including frontotemporallobar degeneration. Acta neuropathologica. 2015;130(1):145-157.
[451] Ioannides ZA, Henderson RD, Robertson T, Davis M, McCombe PA.When does ALS start? A novel SOD-1 p.Gly142Arg mutation causingmotor neurone disease with prominent premorbid cramps and spasms.;2016
[452] Mase G, Ros S, Gemma A, Bongli L, Carraro N, Cazzato G, et al. ALSwith variable phenotypes in a six-generation family caused by leu144phemutation in the SOD1 gene. Journal of the neurological sciences. 2001;191(1-2):11-18.
[453] Ferrera L, Caponnetto C, Marini V, Rizzi D, Bordo D, Penco S, et al. AnItalian dominant FALS Leu144Phe SOD1 mutation: genotype-phenotypecorrelation. Amyotrophic lateral sclerosis and other motor neuron disorders: ocial publication of the World Federation of Neurology, ResearchGroup on Motor Neuron Diseases. 2003;4(3):167-170.
[454] Corcia P, Petiot P, Stevic Z, Vourc'h P, Morales R, Gordon PH, et al.Respiratory onset in an ALS family with L144F SOD1 mutation. Journalof neurology, neurosurgery, and psychiatry. 2011;82(7):747-749.
[455] Hayashi K, Mochizuki Y, Koide R, Kawata A, Homma T, Shimizu T,et al. A Japanese familial ALS patient with autonomic failure and ap.Cys146Arg mutation in the gene for SOD1 (SOD1).; 2016.
[456] Wu J, Shen E, Shi D, Sun Z, Cai T. identification of a novel Cys146Xmutation of SOD1 in familial amyotrophic lateral sclerosis by whole-exomesequencing. Genetics in medicine : ocial journal of the American Collegeof Medical Genetics. 2012;14(9):823-826.
[457] Origone P, Caponnetto C, Mantero V, Cichero E, Fossa P, Geroldi A,et al. Fast course ALS presenting with vocal cord paralysis: clinical features,bioinformatic and modelling analysis of the novel SOD1 Gly147Sermutation. Amyotrophic lateral sclerosis : ocial publication of the WorldFederation of Neurology Research Group on Motor Neuron Diseases. 2012;13(1):144-148.
[458] Canosa A, Calvo A, Moglia C, Iazzolino B, Brunetti M, Restagno G,et al. A familial ALS case carrying a novel p.G147C SOD1 heterozygousmissense mutation with non-executive cognitive impairment.; 2014.
[459] Ikeda M, Abe K, Aoki M, Ogasawara M, Kameya T,Watanabe M, et al. Anovel point mutation in the Cu/Zn superoxide dismutase gene in a patientwith familial amyotrophic lateral sclerosis. Human molecular genetics.1995;4(3):491-492.
[460] Fong GCY, Kwok KHH, Song YQ, Cheng TS, Ho PWL, Chu ACY, et al.Clinical phenotypes of a large Chinese multigenerational kindred withautosomal dominant familial ALS due to Ile149Thr SOD1 gene mutation.Amyotrophic lateral sclerosis : ocial publication of the WorldFederation of Neurology Research Group on Motor Neuron Diseases. 2006;7(3):142-149.
[461] Trojsi F, Monsurro MR, Tedeschi G. Exposure to environmental toxicantsand pathogenesis of amyotrophic lateral sclerosis: state of the art andresearch perspectives. Int J Mol Sci.;(8):15286-15311.
[462] Kostrzewa M, Damian MS, Muller U. Superoxide dismutase 1: identification of a novel mutation in a case of familial amyotrophic lateral sclerosis.Human genetics. 1996;98(1):48-50.
